# Supplementary material for: De novo antibody identification in human blood from full-length single B cell transcriptomics and matching haplotype-resolved germline assemblies
Source: Genome Res. 2025 Apr;35(4):929–41. doi: 10.1101/gr.279392.124 (PMC12047243; doi:10.1101/gr.279392.124)
Supplement: Supplement 1 [file Supplemental_Table_S3.xlsx]

## Sheet: README
Transcripts whose expression in one cluster was significantly different from the expression in all cells outside of that cluster. Calculated using the FindAllMarkers function in Seurat. Only showing a sample of the table; full table available in p8_isoform_markers.v3.genes tab.

## Sheet: p8_isoform_markers.v3.genes
p_val	avg_log2FC	pct.1	pct.2	p_val_adj	cluster	negative_log_pval_adj	transcript	gene
0	1.71312	0.873	0.425	1e-300	0	300	ENST00000390237	IGKC
0	-3.82734	0.238	0.712	1e-300	1	300	ENST00000390237	IGKC
0	1.45942	0.805	0.325	1e-300	0	300	ENST00000390239	IGKJ4
0	-4.6448	0.126	0.632	1e-300	1	300	ENST00000390239	IGKJ4
0	5.22116	0.926	0.046	1e-300	4	300	ENST00000390243	IGKV4-1
0	7.60726	0.435	0.003	1e-300	6	300	ENST00000390282	IGLV4-69
0	9.72601	0.831	0.002	1e-300	11	300	ENST00000390287	IGLV10-54
0	6.25624	0.278	0.006	1e-300	5	300	ENST00000390295	IGLV7-46
0	6.34821	0.774	0.062	1e-300	5	300	ENST00000390298	IGLV7-43
0	8.88879	0.928	0.015	1e-300	7	300	ENST00000390310	IGLV2-18
0	6.78862	0.404	0.006	1e-300	7	300	ENST00000390314	IGLV2-11
0	5.78534	1	0.089	1e-300	7	300	ENST00000390321	IGLC1
0	-4.11526	0.16	0.622	1e-300	0	300	ENST00000390323	IGLC2
0	2.7772	0.9	0.289	1e-300	1	300	ENST00000390323	IGLC2
0	-3.95664	0.167	0.589	1e-300	0	300	ENST00000390325	IGLC3
0	2.56088	0.848	0.282	1e-300	1	300	ENST00000390325	IGLC3
0	6.98524	0.935	0.037	1e-300	6	300	ENST00000390331	IGLC7
0	7.62038	0.96	0.017	1e-300	10	300	ENST00000390556	IGHD
0	8.40055	0.932	0.004	1e-300	8	300	ENST00000448155	IGKV1D-39
0	8.63828	0.778	0.003	1e-300	9	300	ENST00000468494	IGKV2-30
0	8.99867	0.713	0.001	1e-300	9	300	ENST00000474213	IGKV2D-30
0	1.81024	0.84	0.307	1e-300	2	300	ENST00000507116	PDE4D
0	7.03122	0.848	0.011	1e-300	10	300	ENST00000613640
3.40111e-299	2.03095	0.615	0.156	1.75671e-294	2	293.755	ENST00000340635	PDE4D
1.31227e-253	1.88415	0.707	0.26	6.778e-249	2	248.169	ENST00000475724	LYPLAL1
3.63203e-241	1.88461	0.65	0.22	1.87598e-236	2	235.727	ENST00000503258	PDE4D
4.42507e-215	-3.5799	0.614	0.999	2.28559e-210	3	209.641	ENST00000428791
1.22014e-213	-3.27343	0.491	1	6.30213e-209	3	208.201	ENST00000321153	RPLP2
3.08807e-213	-3.39679	0.605	1	1.59502e-208	3	207.797	ENST00000394665	RPL34
1.08962e-211	-3.62266	0.429	0.999	5.62801e-207	3	206.25	ENST00000583011	RPL26
2.20472e-211	-3.31734	0.619	0.999	1.13876e-206	3	205.944	ENST00000287038	RPL30
3.35861e-211	-3.58678	0.315	0.998	1.73476e-206	3	205.761	ENST00000647225	RPS27AP5
5.11166e-211	-3.40333	0.619	1	2.64022e-206	3	205.578	ENST00000260379	RPLP1
1.22202e-210	-3.54577	0.403	0.999	6.31184e-206	3	205.2	ENST00000532567	RPS25
3.08778e-210	-3.282	0.52	0.998	1.59487e-205	3	204.797	ENST00000648006	B2M
3.26456e-209	-3.47652	0.585	1	1.68618e-204	3	203.773	ENST00000230050	RPS12
4.63042e-208	-3.38749	0.466	0.999	2.39166e-203	3	202.621	ENST00000225430	RPL19
6.3389e-208	-3.37636	0.418	0.999	3.2741e-203	3	202.485	ENST00000381298	IL6ST
5.60577e-207	-3.19819	0.494	0.999	2.89544e-202	3	201.538	ENST00000492356	RPS21
8.04614e-207	-3.18333	0.545	0.999	4.15591e-202	3	201.381	ENST00000233143	TMSB10
8.22292e-207	-3.7265	0.236	0.994	4.24722e-202	3	201.372	ENST00000549920	RPL18
9.01709e-207	-3.49212	0.33	0.998	4.65742e-202	3	201.332	ENST00000272317	RPS27A
1.67739e-206	-3.44536	0.401	0.999	8.66389e-202	3	201.062	ENST00000525634	RPS13
2.91665e-206	-3.26904	0.477	0.999	1.50648e-201	3	200.822	ENST00000274242	RPL37
4.52464e-206	-3.54701	0.264	0.997	2.33702e-201	3	200.631	ENST00000531188	RPS3
7.62131e-206	-3.2896	0.432	0.998	3.93648e-201	3	200.405	ENST00000429437	RPL35A
1.02345e-205	-3.61817	0.224	0.995	5.28622e-201	3	200.277	ENST00000370367	KHDC3L
1.40166e-205	-3.31763	0.438	0.999	7.23972e-201	3	200.14	ENST00000563390	RPS15A
4.46029e-205	-3.44922	0.276	0.994	2.30378e-200	3	199.638	ENST00000395388	HLA-DRA
5.94227e-205	-3.29631	0.409	0.999	3.06924e-200	3	199.513	ENST00000473595	LINC02067
9.67933e-205	-3.37698	0.364	0.998	4.99947e-200	3	199.301	ENST00000648437	RPS10
1.11871e-204	-3.30391	0.375	0.998	5.77823e-200	3	199.238	ENST00000251453	RPS16
2.24229e-204	-3.12725	0.446	0.998	1.15816e-199	3	198.936	ENST00000394580	RPL36
4.1505e-204	-3.15913	0.568	1	2.14378e-199	3	198.669	ENST00000245458	RPS29
4.19174e-204	-3.41097	0.358	0.998	2.16508e-199	3	198.665	ENST00000616679	KIZ
6.11874e-204	1.78077	0.586	0.197	3.16039e-199	2	198.5	ENST00000612282
8.80416e-204	-3.33238	0.352	0.996	4.54744e-199	3	198.342	ENST00000316084	RPS4X
1.81349e-203	-3.47362	0.244	0.996	9.36687e-199	3	198.028	ENST00000322203	RPL10A
4.21916e-203	-3.32753	0.378	0.999	2.17924e-198	3	197.662	ENST00000289547	NPC1L1
1.01115e-202	-3.4059	0.312	0.998	5.22269e-198	3	197.282	ENST00000274065	RPS3A
1.02426e-202	-3.50193	0.341	0.997	5.29038e-198	3	197.277	ENST00000451311	TMSB4X
6.9973e-202	-3.53024	0.227	0.995	3.61417e-197	3	196.442	ENST00000610057
6.18836e-201	-3.53408	0.25	0.996	3.19635e-196	3	195.495	ENST00000445350	OOEP-AS1
4.65266e-200	-3.57874	0.236	0.992	2.40315e-195	3	194.619	ENST00000392222	EEF1B2
2.82459e-199	-3.38997	0.247	0.993	1.45893e-194	3	193.836	ENST00000671287	MIR4300HG
3.48581e-199	-3.49225	0.207	0.991	1.80046e-194	3	193.745	ENST00000216146	RPL3
4.58865e-198	-3.21165	0.278	0.995	2.37008e-193	3	192.625	ENST00000348462	RPL35
6.74458e-198	-3.1067	0.384	0.997	3.48364e-193	3	192.458	ENST00000009589	RPS20
5.81938e-197	-3.48703	0.19	0.987	3.00577e-192	3	191.522	ENST00000196551	RPS5
5.5233e-196	-3.19609	0.29	0.995	2.85284e-191	3	190.545	ENST00000253788	RPL27
1.03301e-195	-3.45204	0.193	0.992	5.33559e-191	3	190.273	ENST00000549807
1.22298e-195	-3.63947	0.165	0.991	6.31683e-191	3	190.2	ENST00000561157	RPS17
1.62527e-195	-3.41985	0.182	0.993	8.39468e-191	3	190.076	ENST00000370363	OOEP
1.35192e-194	-3.35973	0.213	0.993	6.9828e-190	3	189.156	ENST00000645300	RPL5
1.42109e-194	-3.1957	0.278	0.993	7.34007e-190	3	189.134	ENST00000394077	RPL24
4.27391e-194	-3.36549	0.199	0.989	2.20752e-189	3	188.656	ENST00000355451	NUDCD3
1.91742e-193	-2.94264	0.438	0.997	9.90367e-189	3	188.004	ENST00000374213	CD52
2.19973e-192	-3.52047	0.168	0.986	1.13618e-187	3	186.945	ENST00000444914	SLC13A2
2.24745e-192	1.73149	0.537	0.17	1.16083e-187	2	186.935	ENST00000663591
4.48752e-191	-3.54417	0.153	0.985	2.31785e-186	3	185.635	ENST00000391753	RPS9
2.07385e-190	-3.48715	0.145	0.982	1.07116e-185	3	184.97	ENST00000645674	RPS7
1.17176e-189	-3.23018	0.21	0.988	6.05227e-185	3	184.218	ENST00000533498	RPL38
8.01792e-189	-3.04451	0.267	0.992	4.14133e-184	3	183.383	ENST00000430157	UBA52
7.07784e-188	-3.00852	0.227	0.99	3.65578e-183	3	182.437	ENST00000439590	RPL38
1.40637e-187	-3.67572	0.114	0.982	7.26403e-183	3	182.139	ENST00000463284	TOMM7
1.50502e-187	1.87335	1	1	7.77357e-183	3	182.109	ENST00000362079	MT-CO3
1.48675e-185	-3.29118	0.173	0.986	7.67923e-181	3	180.115	ENST00000392385
1.56914e-185	3.24075	0.375	0.114	8.10476e-181	1	180.091	ENST00000390312	IGLV2-14
3.58268e-185	-3.11389	0.241	0.986	1.85049e-180	3	179.733	ENST00000243997	ATP5F1E
3.74836e-185	-3.4304	0.145	0.984	1.93607e-180	3	179.713	ENST00000234875	RPL22
2.82716e-184	-4.22383	0.071	0.377	1.46025e-179	1	178.836	ENST00000498435	IGKV1-27
2.88539e-183	-3.18764	0.179	0.986	1.49033e-178	3	177.827	ENST00000511900	RACK1
3.76656e-183	-3.20699	0.159	0.987	1.94546e-178	3	177.711	ENST00000369965	WDR47
5.42854e-183	-3.24496	0.168	0.988	2.80389e-178	3	177.552	ENST00000599944
1.31161e-182	1.94822	1	0.999	6.77459e-178	3	177.169	ENST00000361899	MT-ATP6
1.70231e-180	-2.82786	0.284	0.989	8.79263e-176	3	175.056	ENST00000416804	HLA-DPB1
1.22561e-179	-3.41234	0.131	0.972	6.33038e-175	3	174.199	ENST00000643754	RPL11
1.44666e-179	1.67694	1	1	7.47212e-175	3	174.127	ENST00000361624	MT-CO1
1.476e-179	-3.56638	0.082	0.968	7.62368e-175	3	174.118	ENST00000652205
7.30601e-179	-3.09354	0.19	0.981	3.77363e-174	3	173.423	ENST00000391752	RPS9
2.48242e-178	-3.12758	0.151	0.98	1.28219e-173	3	172.892	ENST00000453654	DGKI
4.58618e-174	1.73117	1	0.999	2.36881e-169	3	168.625	ENST00000361739	MT-CO2
1.84496e-173	-3.47649	0.114	0.963	9.52943e-169	3	168.021	ENST00000228825	ARPC3
3.05553e-173	-3.51432	0.102	0.961	1.57821e-168	3	167.802	ENST00000407193	RPS14
3.50777e-173	-3.24389	0.122	0.966	1.8118e-168	3	167.742	ENST00000247655	COX7C
5.81329e-173	-3.62102	0.085	0.948	3.00262e-168	3	167.522	ENST00000460355	NBEAL1
2.0899e-172	1.87187	0.903	0.258	1.07945e-167	4	166.967	ENST00000498435	IGKV1-27
2.80493e-171	-3.26388	0.131	0.965	1.44878e-166	3	165.839	ENST00000551018	PFDN5
3.17145e-171	2.4849	0.988	0.457	1.63809e-166	4	165.786	ENST00000390239	IGKJ4
8.53049e-170	-3.52695	0.077	0.951	4.40608e-165	3	164.356	ENST00000520041
1.49048e-168	1.75207	1	0.999	7.6985e-164	3	163.114	ENST00000361227	MT-ND3
4.81402e-167	2.41241	0.465	0.197	2.48649e-162	0	161.604	ENST00000496168	IGKV1-5
1.13326e-166	-3.98001	0.08	0.371	5.85341e-162	1	161.233	ENST00000390247	IGKV3-7
2.18731e-166	-3.12048	0.131	0.965	1.12977e-161	3	160.947	ENST00000556230	RPS29
3.58689e-166	-4.14792	0.062	0.917	1.85266e-161	3	160.732	ENST00000311672	UQCRH
5.54269e-166	-3.40141	0.065	0.935	2.86286e-161	3	160.543	ENST00000370812	PIGK
1.93322e-165	-3.44386	0.082	0.94	9.98529e-161	3	160.001	ENST00000335895	BTF3
1.08576e-164	-3.26336	0.097	0.957	5.60804e-160	3	159.251	ENST00000651669	RPS27
2.90739e-164	-3.44523	0.099	0.94	1.5017e-159	3	158.823	ENST00000547649	MYL6
4.61918e-164	1.75223	0.997	0.999	2.38585e-159	3	158.622	ENST00000361789	MT-CYB
2.98633e-162	-3.44002	0.088	0.934	1.54247e-157	3	156.812	ENST00000217652	MYL12A
1.7094e-161	-3.23083	0.114	0.949	8.82924e-157	3	156.054	ENST00000508495	HINT1
3.2595e-161	2.16123	0.33	0.072	1.68357e-156	2	155.774	ENST00000556614	HOPX
4.49916e-161	-2.49107	0.327	0.981	2.32386e-156	3	155.634	ENST00000360004	HLA-DRB1
1.14272e-160	-3.24168	0.082	0.94	5.90226e-156	3	155.229	ENST00000491306	RPL37A
2.6789e-159	-2.79875	0.207	0.97	1.38368e-154	3	153.859	ENST00000221972	CD79A
4.41778e-158	-3.3276	0.068	0.929	2.28183e-153	3	152.642	ENST00000262584	RPL8
4.69363e-158	1.86355	0.357	0.11	2.42431e-153	1	152.615	ENST00000390309	IGLV3-19
6.98386e-158	-3.26059	0.082	0.931	3.60723e-153	3	152.443	ENST00000253452	COX4I1
2.97228e-157	-2.81975	0.159	0.963	1.53521e-152	3	151.814	ENST00000438607	TMA7
3.62521e-157	-3.38278	0.068	0.922	1.87246e-152	3	151.728	ENST00000439602	RPS18
7.98233e-156	-2.87167	0.139	0.953	4.12295e-151	3	150.385	ENST00000355801	COMMD6
1.22348e-154	-3.19956	0.08	0.921	6.31938e-150	3	149.199	ENST00000456793	OST4
3.88252e-154	-3.5024	0.065	0.912	2.00536e-149	3	148.698	ENST00000602676	OAZ1
5.9263e-152	-3.09756	0.077	0.919	3.061e-147	3	146.514	ENST00000409115	PTMA
3.90622e-148	-3.37776	0.094	0.907	2.0176e-143	3	142.695	ENST00000377803	H4C3
1.21696e-147	-3.62075	0.06	0.879	6.28572e-143	3	142.202	ENST00000248342	EIF3K
2.95997e-147	-2.96658	0.097	0.928	1.52885e-142	3	141.816	ENST00000267884	SRP14
5.26105e-147	-3.09121	0.097	0.911	2.71738e-142	3	141.566	ENST00000649813	COX6B1
7.056e-147	1.62082	1	0.999	3.64449e-142	3	141.438	ENST00000361381	MT-ND4
4.07114e-146	-3.27692	0.074	0.898	2.10279e-141	3	140.677	ENST00000602554
4.67826e-146	-3.18798	0.071	0.894	2.41637e-141	3	140.617	ENST00000616760	CLIC1
2.02866e-145	-4.06892	0.031	0.846	1.04783e-140	3	139.98	ENST00000586895	UBL5
8.95044e-142	-4.97403	0.026	0.821	4.62299e-137	3	136.335	ENST00000302182	UBB
1.25863e-140	-4.35107	0.028	0.829	6.50097e-136	3	135.187	ENST00000237500	MYL12B
5.79158e-140	-3.11094	0.108	0.894	2.99141e-135	3	134.524	ENST00000250784	RPS4Y1
2.97515e-139	-2.47278	0.162	0.942	1.5367e-134	3	133.813	ENST00000457942	CHCHD3
8.50655e-139	-3.42249	0.054	0.858	4.39372e-134	3	133.357	ENST00000589417	H3-3B
2.24496e-138	-3.70897	0.04	0.841	1.15954e-133	3	132.936	ENST00000395119	EEF1D
5.67252e-136	-3.74329	0.057	0.844	2.92992e-131	3	130.533	ENST00000229239	GAPDH
1.6583e-135	2.12634	0.304	0.073	8.56527e-131	2	130.067	ENST00000371497	TSHZ2
1.80791e-133	-3.47426	0.048	0.835	9.33805e-129	3	128.03	ENST00000370089	COX7A2
5.51898e-132	-3.54717	0.045	0.827	2.85061e-127	3	126.545	ENST00000548577	RNASEK
1.43854e-131	4.161	0.983	0.197	7.43022e-127	8	126.129	ENST00000498574	IGKV1-39
2.15041e-130	1.59309	0.991	0.99	1.11071e-125	3	124.954	ENST00000361390	MT-ND1
1.9372e-129	1.7796	0.447	0.205	1.00058e-124	0	124	ENST00000390247	IGKV3-7
3.32527e-129	-2.53737	0.116	0.895	1.71753e-124	3	123.765	ENST00000228945	ARHGDIB
3.66375e-129	-3.81997	0.11	0.359	1.89236e-124	1	123.723	ENST00000496168	IGKV1-5
1.97007e-128	-3.06796	0.077	0.85	1.01756e-123	3	122.992	ENST00000371437	NDUFA1
1.68002e-127	-4.61124	0.037	0.255	8.67745e-123	0	122.062	ENST00000390309	IGLV3-19
1.8219e-127	-2.73941	0.105	0.88	9.41031e-123	3	122.026	ENST00000377795	CD74
3.06914e-126	-3.56707	0.034	0.799	1.58524e-121	3	120.8	ENST00000270142	SOD1
5.03806e-126	-3.48291	0.04	0.801	2.60221e-121	3	120.585	ENST00000335890	UXT
1.11556e-125	-3.79262	0.043	0.8	5.76196e-121	3	120.239	ENST00000314675	UBXN11
3.4295e-125	-3.92642	0.04	0.791	1.77137e-120	3	119.752	ENST00000595207	GMFG
4.37168e-123	-3.22604	0.057	0.813	2.25802e-118	3	117.646	ENST00000229379	COX6A1
5.63671e-122	-3.45175	0.051	0.798	2.91142e-117	3	116.536	ENST00000366815	H3-3A
1.02704e-121	-4.69917	0.023	0.759	5.30478e-117	3	116.275	ENST00000249786	SERF2
3.23946e-121	-3.67537	0.026	0.77	1.67321e-116	3	115.776	ENST00000443003	RPSA
5.66546e-121	-3.51615	0.028	0.771	2.92627e-116	3	115.534	ENST00000526895	RPS13
2.27198e-119	-3.82661	0.026	0.764	1.1735e-114	3	113.931	ENST00000376285	PCCA
3.94219e-119	2.10399	0.279	0.069	2.03618e-114	2	113.691	ENST00000435168	SMAP2
1.18067e-118	1.98056	0.288	0.074	6.0983e-114	2	113.215	ENST00000420237
1.85081e-118	-2.78755	0.057	0.81	9.55963e-114	3	113.02	ENST00000561775	RPL4
2.99807e-118	-3.6239	0.037	0.773	1.54853e-113	3	112.81	ENST00000409906	ELOB
3.13018e-118	-3.20939	0.057	0.799	1.61677e-113	3	112.791	ENST00000613788	CD48
2.23779e-117	2.08988	0.252	0.057	1.15584e-112	2	111.937	ENST00000541715	IFNG-AS1
2.86151e-117	-2.48209	0.085	0.842	1.478e-112	3	111.83	ENST00000216281	HSP90AA1
4.71785e-117	-3.34951	0.037	0.772	2.43682e-112	3	111.613	ENST00000579374	RPL19
2.97057e-115	-3.40969	0.045	0.767	1.53433e-110	3	109.814	ENST00000242577	DYNLL1
8.75884e-115	-3.24916	0.04	0.77	4.52403e-110	3	109.344	ENST00000420826	SUMO2
1.24076e-113	3.97524	1	0.176	6.40863e-109	11	108.193	ENST00000390309	IGLV3-19
5.75079e-113	-2.0895	0.134	0.883	2.97034e-108	3	107.527	ENST00000309311	EEF2
8.35633e-113	-2.48694	0.099	0.828	4.31613e-108	3	107.365	ENST00000374050	ATP6V1G1
1.17077e-112	-3.50555	0.04	0.753	6.04715e-108	3	107.218	ENST00000286953	ATP5MJ
1.24778e-112	-2.50468	0.054	0.789	6.44489e-108	3	107.191	ENST00000330029	UQCR10
2.53915e-111	-3.77636	0.017	0.723	1.31149e-106	3	105.882	ENST00000401695	RPS14
7.83002e-111	-3.32864	0.048	0.764	4.04428e-106	3	105.393	ENST00000573283	ACTG1
1.67585e-110	1.341	0.443	0.171	8.65593e-106	2	105.063	ENST00000330540	CD86
1.94003e-109	-3.9327	0.028	0.729	1.00205e-104	3	103.999	ENST00000491560	ATP5MF
1.98522e-109	1.9009	0.923	0.822	1.02538e-104	3	103.989	ENST00000508653	BANK1
4.98877e-109	-3.33337	0.051	0.758	2.57675e-104	3	103.589	ENST00000322989	RPS15A
1.63906e-108	-2.64947	0.071	0.79	8.46589e-104	3	103.072	ENST00000304312	ATP5ME
4.76825e-108	-4.19058	0.023	0.717	2.46285e-103	3	102.609	ENST00000290299	ATP5PO
1.84297e-107	2.49909	0.865	0.119	9.51915e-103	11	102.021	ENST00000390305	IGLV3-25
2.43146e-107	-3.03949	0.074	0.779	1.25587e-102	3	101.901	ENST00000309579	ATP5MK
4.54863e-107	-2.86836	0.045	0.756	2.34941e-102	3	101.629	ENST00000308162	CFL1
1.37265e-104	1.58897	0.977	0.982	7.0899e-100	3	99.1494	ENST00000361567	MT-ND5
2.40447e-104	1.74672	0.938	0.952	1.24193e-99	3	98.9059	ENST00000361851	MT-ATP8
1.49604e-103	-4.09126	0.023	0.701	7.72717e-99	3	98.112	ENST00000588234	C19orf53
1.76342e-103	-2.53904	0.062	0.768	9.10822e-99	3	98.0406	ENST00000306072	ISG20
3.24119e-103	-2.8054	0.057	0.751	1.67411e-98	3	97.7762	ENST00000520944	SNHG6
7.02649e-103	-2.90275	0.045	0.737	3.62925e-98	3	97.4402	ENST00000652167	FAM153CP
8.88935e-103	-2.80135	0.043	0.735	4.59144e-98	3	97.3381	ENST00000584164	RPL26
2.0303e-101	-2.88359	0.051	0.741	1.04867e-96	3	95.9794	ENST00000654795	SNHG5
4.80003e-101	-2.86712	0.054	0.743	2.47926e-96	3	95.6057	ENST00000233893	HSPE1
3.58347e-100	-3.01235	0.048	0.731	1.8509e-95	3	94.7326	ENST00000328848	NOP10
4.76092e-100	-2.63273	0.08	0.767	2.45907e-95	3	94.6092	ENST00000274787	HIGD2A
8.48078e-100	1.52062	0.994	0.994	4.38041e-95	3	94.3585	ENST00000361453	MT-ND2
8.8025e-100	-3.09069	0.128	0.772	4.54658e-95	3	94.3423	ENST00000368716	S100A4
2.38992e-99	-2.7364	0.057	0.735	1.23442e-94	3	93.9085	ENST00000419277	HLA-DPA1
2.87035e-99	-2.91159	0.045	0.726	1.48257e-94	3	93.829	ENST00000544844	TRMT112
3.75791e-99	-3.29682	0.048	0.721	1.941e-94	3	93.712	ENST00000295682	KRTCAP2
7.44852e-99	-3.01208	0.054	0.73	3.84724e-94	3	93.4149	ENST00000273258	ARL6IP5
1.35946e-98	-3.50205	0.037	0.702	7.02174e-94	3	93.1536	ENST00000287022	UQCRB
2.05685e-98	-3.70616	0.026	0.688	1.06238e-93	3	92.9737	ENST00000537328	TMEM258
2.25908e-98	1.46219	0.434	0.214	1.16684e-93	0	92.933	ENST00000498435	IGKV1-27
4.72911e-98	-2.70587	0.062	0.743	2.44264e-93	3	92.6121	ENST00000374843	HLA-DMA
1.9877e-97	-2.95167	0.04	0.703	1.02667e-92	3	91.9886	ENST00000441722	ZFAS1
2.37696e-97	-4.18698	0.017	0.67	1.22772e-92	3	91.9109	ENST00000449573
2.30474e-96	-1.56129	0.243	0.464	1.19042e-91	0	90.9243	ENST00000507116	PDE4D
6.16358e-96	-2.73737	0.045	0.708	3.18355e-91	3	90.4971	ENST00000256644	LAMTOR5
9.08985e-96	-2.98254	0.051	0.714	4.695e-91	3	90.3284	ENST00000496817	S100A6
1.55579e-95	-2.72362	0.045	0.709	8.03579e-91	3	90.095	ENST00000223641	SEC61B
3.87803e-95	-3.37389	0.031	0.684	2.00304e-90	3	89.6983	ENST00000184266	NDUFB4
4.06403e-95	-3.8723	0.031	0.68	2.09911e-90	3	89.678	ENST00000396070	RPL30
4.33204e-95	-3.35717	0.037	0.692	2.23754e-90	3	89.6502	ENST00000547130	PFDN5
1.94577e-94	-3.77496	0.026	0.669	1.00501e-89	3	88.9978	ENST00000355857	DBI
3.41572e-94	-2.69912	0.043	0.696	1.76425e-89	3	88.7534	ENST00000521861	EIF3H
3.75353e-94	-2.83023	0.043	0.701	1.93874e-89	3	88.7125	ENST00000300026	PPIB
7.16294e-94	-3.63657	0.031	0.678	3.69973e-89	3	88.4318	ENST00000250495	NEDD8
2.08606e-93	-3.69069	0.034	0.675	1.07747e-88	3	87.9676	ENST00000652974	CALM2
4.26219e-93	-2.9158	0.045	0.697	2.20146e-88	3	87.6573	ENST00000604183
5.36213e-93	-3.50588	0.066	0.253	2.76959e-88	0	87.5576	ENST00000390312	IGLV2-14
6.97649e-93	-2.73457	0.031	0.678	3.60343e-88	3	87.4433	ENST00000543796	RAN
1.19579e-92	-2.55349	0.074	0.742	6.17638e-88	3	87.2093	ENST00000392795	CD79B
1.53332e-92	-3.26626	0.037	0.683	7.91974e-88	3	87.1013	ENST00000361575	RPL39
7.19962e-92	-2.69752	0.088	0.741	3.71868e-87	3	86.4296	ENST00000330927	EVI2B
1.02625e-91	-1.85546	0.182	0.863	5.30069e-87	3	86.2757	ENST00000374859	PSMB9
1.04123e-91	0.70819	0.869	0.64	5.37805e-87	2	86.2694	ENST00000549727	ATP2B1
1.23394e-90	-2.98181	0.028	0.663	6.37341e-86	3	85.1956	ENST00000294189	RPL29
1.43299e-90	-2.8903	0.037	0.678	7.40154e-86	3	85.1307	ENST00000518218	TBCA
1.93428e-89	-2.59287	0.068	0.716	9.99074e-85	3	84.0004	ENST00000322028	POLR2L
1.21392e-88	-2.51372	0.08	0.733	6.27001e-84	3	83.2027	ENST00000519374	ATP6V0E1
1.27892e-88	-2.93744	0.048	0.679	6.60573e-84	3	83.1801	ENST00000475947	SNHG29
2.22446e-88	-3.49886	0.076	0.266	1.14895e-83	1	82.9397	ENST00000498574	IGKV1-39
6.48314e-86	1.23333	0.442	0.196	3.34861e-81	2	80.4751	ENST00000372734	ADK
2.30515e-85	-2.67844	0.054	0.681	1.19063e-80	3	79.9242	ENST00000381401	SLC25A6
3.13854e-85	-4.24514	0.023	0.624	1.62109e-80	3	79.7902	ENST00000557016	ERH
5.20674e-85	-3.14701	0.034	0.648	2.68933e-80	3	79.5704	ENST00000398881	TOMM6
9.98315e-85	-2.71065	0.065	0.693	5.1564e-80	3	79.2877	ENST00000557154	SRSF5
1.4195e-84	-3.38211	0.037	0.647	7.33189e-80	3	79.1348	ENST00000247866	NDUFB2
6.01993e-84	-3.02083	0.062	0.675	3.10935e-79	3	78.5073	ENST00000368097	TAGLN2
8.12205e-84	-3.97818	0.02	0.616	4.19512e-79	3	78.3773	ENST00000319248	PRDX1
2.34141e-82	-2.54768	0.043	0.652	1.20936e-77	3	76.9174	ENST00000621421	SAP18
4.03609e-82	-2.21995	0.077	0.702	2.08468e-77	3	76.681	ENST00000376414	GPR183
1.69498e-81	-3.33697	0.026	0.618	8.75475e-77	3	76.0578	ENST00000477812	ACTB
4.73979e-81	1.69625	0.915	0.938	2.44815e-76	3	75.6112	ENST00000361681	MT-ND6
4.77747e-81	-2.9561	0.045	0.646	2.46761e-76	3	75.6077	ENST00000329559	NDUFB1
8.35067e-80	-2.79206	0.045	0.645	4.3132e-75	3	74.3652	ENST00000284971	ATP5PF
4.38155e-79	-2.32133	0.071	0.682	2.26312e-74	3	73.6453	ENST00000230568	LY86
1.82524e-77	0.754677	0.822	0.594	9.42757e-73	2	72.0256	ENST00000574081	SCIMP
2.08092e-77	0.759928	0.718	0.457	1.07481e-72	2	71.9687	ENST00000372195	RAPGEF1
2.18294e-77	1.34625	0.461	0.228	1.12751e-72	2	71.9479	ENST00000373408	CCDC167
2.47342e-77	1.3395	0.32	0.119	1.27755e-72	2	71.8936	ENST00000397833	PLEKHG7
4.16068e-77	-2.83037	0.045	0.632	2.14903e-72	3	71.6678	ENST00000302386	GABARAP
5.98561e-77	0.875852	0.633	0.359	3.09163e-72	2	71.5098	ENST00000368811	S100A10
2.69766e-76	-2.80351	0.045	0.629	1.39337e-71	3	70.8559	ENST00000530758	BRK1
4.14668e-76	0.733787	0.746	0.263	2.1418e-71	4	70.6692	ENST00000390247	IGKV3-7
1.77064e-75	-3.39821	0.014	0.573	9.14552e-71	3	70.0388	ENST00000619426	PSMB3
2.62317e-75	-2.71106	0.043	0.62	1.35489e-70	3	69.8681	ENST00000266735	SNRPF
9.13411e-75	-3.12215	0.028	0.594	4.71786e-70	3	69.3263	ENST00000379060	TPT1
1.60832e-74	1.60301	0.282	0.1	8.30713e-70	2	69.0805	ENST00000369485	RNGTT
2.69169e-74	-2.55765	0.054	0.63	1.39028e-69	3	68.8569	ENST00000317881	SLC25A5
5.87155e-74	-2.91641	0.026	0.585	3.03271e-69	3	68.5182	ENST00000263864	VAMP8
6.17612e-74	-2.87456	0.028	0.59	3.19003e-69	3	68.4962	ENST00000542077	DTL
2.89178e-73	-3.21217	0.031	0.588	1.49363e-68	3	67.8258	ENST00000511472	COX7C
3.79765e-73	-4.78759	0.009	0.551	1.96153e-68	3	67.7074	ENST00000224073	EDF1
1.43212e-72	1.26108	0.347	0.143	7.39705e-68	2	67.1309	ENST00000220597	PAG1
2.06257e-72	-2.75044	0.028	0.582	1.06534e-67	3	66.9725	ENST00000357156	DYNLRB1
2.2445e-72	-2.33942	0.068	0.647	1.15931e-67	3	66.9358	ENST00000267115	TMBIM6
2.44807e-72	-3.81162	0.023	0.569	1.26446e-67	3	66.8981	ENST00000368719	S100A6
5.34659e-72	-2.8576	0.031	0.585	2.76157e-67	3	66.5588	ENST00000301587	ATP5PD
1.0844e-71	-2.61639	0.043	0.604	5.60103e-67	3	66.2517	ENST00000373212	SH3BGRL
1.73914e-71	-2.73146	0.04	0.597	8.98281e-67	3	66.0466	ENST00000616316	IFITM2
7.25766e-71	-3.29347	0.023	0.564	3.74865e-66	3	65.4261	ENST00000237889	NDUFB3
2.22076e-70	-3.22563	0.034	0.581	1.14705e-65	3	64.9404	ENST00000308961	NDUFA11
3.12493e-70	1.09557	0.378	0.163	1.61406e-65	2	64.7921	ENST00000281821	EPHA4
4.94133e-70	-2.36299	0.065	0.625	2.55224e-65	3	64.5931	ENST00000261070	COX17
1.05779e-69	-2.09911	0.043	0.599	5.46358e-65	3	64.2625	ENST00000250498	DAD1
9.56179e-69	-3.30433	0.026	0.56	4.93876e-64	3	63.3064	ENST00000361436	RPL12
3.02471e-68	1.42914	0.258	0.09	1.5623e-63	2	62.8062	ENST00000514231	PDE4D
7.78401e-68	-1.7084	0.116	0.284	4.02052e-63	0	62.3957	ENST00000340635	PDE4D
9.73532e-68	1.16412	0.386	0.173	5.02839e-63	2	62.2986	ENST00000489654	GSTK1
1.07478e-67	-3.11197	0.037	0.571	5.55137e-63	3	62.2556	ENST00000248566	SEM1
1.14554e-67	-2.94406	0.034	0.569	5.91685e-63	3	62.2279	ENST00000596731	WDR83OS
1.22954e-67	-4.2702	0.011	0.529	6.35071e-63	3	62.1972	ENST00000252102	NDUFA2
3.06657e-67	0.670601	0.982	0.552	1.58391e-62	4	61.8003	ENST00000390237	IGKC
4.83524e-67	-5.00995	0.011	0.524	2.49745e-62	3	61.6025	ENST00000474582	RPS8
4.03699e-66	-3.7479	0.014	0.528	2.08515e-61	3	60.6809	ENST00000311549	RPL21
4.83501e-66	-2.23895	0.062	0.611	2.49733e-61	3	60.6025	ENST00000376327	PLP2
5.91515e-66	-3.78015	0.017	0.528	3.05523e-61	3	60.515	ENST00000374517	TXN
1.11367e-65	-2.99568	0.026	0.544	5.7522e-61	3	60.2402	ENST00000261735	ERP29
1.75227e-65	0.782151	0.663	0.41	9.05067e-61	2	60.0433	ENST00000318066	UBE2N
2.51308e-65	-3.68159	0.017	0.527	1.29803e-60	3	59.8867	ENST00000371646	HSP90AB1
2.56159e-65	-2.8024	0.045	0.575	1.32308e-60	3	59.8784	ENST00000299166	NDUFB8
1.34405e-64	1.88968	0.801	0.793	6.94217e-60	3	59.1585	ENST00000552641	ARHGAP15
3.76034e-64	-2.79809	0.034	0.548	1.94226e-59	3	58.7117	ENST00000281031	NDUFC2
3.90051e-64	-2.82083	0.034	0.55	2.01465e-59	3	58.6958	ENST00000321301	TOMM5
1.42943e-63	0.317242	0.999	0.976	7.38315e-59	2	58.1318	ENST00000233143	TMSB10
2.12961e-63	-2.64297	0.031	0.543	1.09997e-58	3	57.9586	ENST00000399817	IFITM2
2.51346e-63	-4.20318	0.014	0.512	1.29823e-58	3	57.8866	ENST00000272348	SNRPG
5.257e-63	-1.41261	0.17	0.757	2.7153e-58	3	57.5662	ENST00000322723	NCL
6.189e-63	-2.32057	0.045	0.568	3.19668e-58	3	57.4953	ENST00000262193	PSMB1
7.62739e-63	1.28956	0.282	0.109	3.93962e-58	2	57.4045	ENST00000382374	MICU2
2.6404e-62	-2.26252	0.043	0.561	1.36379e-57	3	56.8653	ENST00000236273	SYF2
5.04146e-62	-3.09733	0.017	0.512	2.60397e-57	3	56.5844	ENST00000233468	SF3B6
5.14329e-62	-1.51245	0.176	0.343	2.65656e-57	0	56.5757	ENST00000503258	PDE4D
5.29835e-62	1.09243	0.355	0.158	2.73665e-57	2	56.5628	ENST00000611116	TRAC
8.31562e-62	-1.97997	0.085	0.623	4.2951e-57	3	56.367	ENST00000360270	MSN
2.10358e-61	-1.59185	0.108	0.66	1.08652e-56	3	55.964	ENST00000376802	HLA-A
4.17257e-61	-1.47137	0.122	0.68	2.15517e-56	3	55.6665	ENST00000249071	RAC2
1.01011e-60	-2.40898	0.04	0.546	5.2173e-56	3	55.2826	ENST00000372967	NDUFS5
1.02521e-60	-3.40876	0.028	0.519	5.29531e-56	3	55.2761	ENST00000271638	S100A11
2.33017e-60	-3.11392	0.034	0.529	1.20356e-55	3	54.9195	ENST00000548925	BLOC1S1
3.55208e-60	1.21594	0.311	0.16	1.83469e-55	0	54.7364	ENST00000498574	IGKV1-39
9.38936e-60	-3.00875	0.028	0.52	4.8497e-55	3	54.3143	ENST00000607357	COPS9
1.09657e-59	-2.55018	0.037	0.536	5.66391e-55	3	54.2469	ENST00000376630	HLA-E
1.97228e-59	-2.84542	0.04	0.535	1.0187e-54	3	53.992	ENST00000327772	NDUFA12
1.25388e-58	1.10937	0.36	0.166	6.47641e-54	2	53.1887	ENST00000539019	SSPN
1.38992e-58	-2.97822	0.026	0.508	7.17906e-54	3	53.1439	ENST00000367075	EZR
3.67373e-58	-2.29132	0.051	0.55	1.89752e-53	3	52.7218	ENST00000339647	UBC
5.24861e-58	-1.85741	0.06	0.564	2.71096e-53	3	52.5669	ENST00000418115	RHOA
1.00561e-57	-4.05904	0.011	0.477	5.19406e-53	3	52.2845	ENST00000228306	RPLP0
1.47164e-57	-3.1654	0.023	0.497	7.60115e-53	3	52.1191	ENST00000466254	TRBC2
1.73853e-57	1.06405	0.336	0.15	8.97967e-53	2	52.0467	ENST00000344636	PLEKHG7
2.3413e-57	1.27153	0.28	0.113	1.2093e-52	2	51.9175	ENST00000246551	HCST
3.10763e-57	-1.54084	0.124	0.279	1.60512e-52	0	51.7945	ENST00000663591
3.51776e-56	-2.79309	0.026	0.496	1.81696e-51	3	50.7407	ENST00000295702	SSR2
3.53038e-56	-2.90703	0.028	0.498	1.82348e-51	3	50.7391	ENST00000524270	SPSB2
3.57295e-56	1.87908	0.776	0.766	1.84546e-51	3	50.7339	ENST00000367364	PTPRC
1.39434e-55	-1.38328	0.202	0.738	7.2019e-51	3	50.1426	ENST00000234313	PLEK
2.36594e-55	0.567576	0.745	0.522	1.22203e-50	2	49.9129	ENST00000356136	UVRAG
3.85482e-55	-2.62557	0.023	0.485	1.99106e-50	3	49.7009	ENST00000673047	LDHB
2.25469e-54	-2.49158	0.04	0.511	1.16457e-49	3	48.9338	ENST00000215829	SNRPD3
2.36051e-54	-3.92329	0.017	0.469	1.21923e-49	3	48.9139	ENST00000303731	TRAPPC1
2.73919e-54	-1.71001	0.082	0.583	1.41482e-49	3	48.8493	ENST00000428008	ZFAS1
2.97374e-54	-2.36058	0.023	0.48	1.53596e-49	3	48.8136	ENST00000550487	COX14
3.91194e-54	-1.19863	0.22	0.384	2.02055e-49	0	48.6945	ENST00000475724	LYPLAL1
6.35791e-54	0.895391	0.378	0.184	3.28392e-49	2	48.4836	ENST00000468626	LYST
7.30424e-54	-2.55604	0.034	0.499	3.77271e-49	3	48.4233	ENST00000311604	LSP1
1.20231e-53	-3.52749	0.02	0.47	6.21005e-49	3	48.2069	ENST00000318066	UBE2N
9.3221e-53	-4.25314	0.009	0.445	4.81496e-48	3	47.3174	ENST00000229238	MRPL51
9.91627e-53	-1.10128	0.131	0.662	5.12185e-48	3	47.2906	ENST00000253039	EIF2S3
1.1014e-52	-3.58466	0.017	0.456	5.68884e-48	3	47.245	ENST00000304414	ARL6IP1
1.39586e-52	-2.66745	0.034	0.487	7.20976e-48	3	47.1421	ENST00000367569	SF3B5
1.73616e-52	-2.04774	0.048	0.515	8.96745e-48	3	47.0473	ENST00000370873	PSMA7
2.49519e-52	0.674303	0.652	0.432	1.28879e-47	2	46.8898	ENST00000279873	ARID5B
2.80464e-52	-2.85637	0.031	0.483	1.44863e-47	3	46.839	ENST00000376806	HLA-A
3.99506e-52	-2.55617	0.045	0.507	2.06349e-47	3	46.6854	ENST00000341942	LAMTOR4
4.78638e-52	-1.31785	0.068	0.551	2.47221e-47	3	46.6069	ENST00000237654	CCNI
5.77332e-52	-2.90027	0.028	0.476	2.98198e-47	3	46.5255	ENST00000306024	LSM3
8.25845e-52	-2.37854	0.043	0.501	4.26557e-47	3	46.37	ENST00000549115	CHURC1
8.67487e-52	0.744954	0.54	0.324	4.48066e-47	2	46.3487	ENST00000264170	KYNU
1.42391e-51	-3.97921	0.011	0.444	7.35465e-47	3	46.1334	ENST00000602890
3.48475e-51	-1.28792	0.168	0.677	1.79991e-46	3	45.7447	ENST00000311507	PLAC8
6.21487e-51	0.689625	0.569	0.354	3.21004e-46	2	45.4935	ENST00000238738	RHOQ
1.06413e-50	-4.1613	0.011	0.438	5.49634e-46	3	45.2599	ENST00000355938	ATP5MC1
1.49519e-50	-3.77441	0.011	0.437	7.72282e-46	3	45.1122	ENST00000557342	SLIRP
2.16891e-50	0.303588	0.998	0.964	1.12027e-45	2	44.9507	ENST00000451311	TMSB4X
3.02221e-50	-2.76127	0.028	0.468	1.561e-45	3	44.8066	ENST00000270586	PSMB6
3.23489e-50	-3.15835	0.051	0.484	1.67086e-45	3	44.7771	ENST00000443565	LINC01781
4.02542e-50	-2.92247	0.028	0.464	2.07917e-45	3	44.6821	ENST00000380842	POMP
5.63767e-50	-3.96076	0.014	0.438	2.91191e-45	3	44.5358	ENST00000352861	SEC61G
8.24965e-50	-3.7441	0.009	0.428	4.26103e-45	3	44.3705	ENST00000528433	RPL38
9.41931e-50	0.699311	0.592	0.376	4.86517e-45	2	44.3129	ENST00000648608	CD53
3.27861e-49	-2.32814	0.031	0.468	1.69343e-44	3	43.7712	ENST00000396386	CBX3
3.61809e-49	0.827564	0.373	0.189	1.86878e-44	2	43.7284	ENST00000472022	KLF12
9.15004e-49	0.537595	0.673	0.455	4.72609e-44	2	43.3255	ENST00000463255
2.11001e-48	-1.95584	0.045	0.486	1.08984e-43	3	42.9626	ENST00000303305	PA2G4
2.16904e-48	-2.40834	0.026	0.451	1.12033e-43	3	42.9507	ENST00000493678	PARK7
2.38839e-48	1.80361	0.736	0.694	1.23363e-43	3	42.9088	ENST00000505091
7.99179e-48	-8.0869	0.003	0.402	4.12784e-43	3	42.3843	ENST00000409753	JPT1
1.52971e-47	3.98888	0.303	0.03	7.90109e-43	11	42.1023	ENST00000390285	IGLV6-57
1.62147e-47	-4.59868	0.009	0.413	8.37505e-43	3	42.077	ENST00000357790	RPLP1
2.18624e-47	-4.35729	0.009	0.413	1.12922e-42	3	41.9472	ENST00000375040	GPSM3
2.25499e-47	-2.35635	0.031	0.453	1.16473e-42	3	41.9338	ENST00000368003	UFC1
2.33974e-47	-3.7187	0.011	0.418	1.2085e-42	3	41.9178	ENST00000488746	SELENOK
2.73548e-47	-2.78665	0.017	0.429	1.4129e-42	3	41.8499	ENST00000567229	RPL4
2.86744e-47	0.802073	0.501	0.298	1.48106e-42	2	41.8294	ENST00000629847	MEF2C
3.39048e-47	-2.08143	0.048	0.486	1.75122e-42	3	41.7567	ENST00000447686	LIX1L-AS1
8.72038e-47	-1.56078	0.065	0.513	4.50416e-42	3	41.3464	ENST00000216225	RBX1
1.65668e-46	-0.732789	0.599	0.713	8.55691e-42	0	41.0677	ENST00000549727	ATP2B1
1.77648e-46	1.00447	0.254	0.108	9.17571e-42	2	41.0374	ENST00000659116	MEF2C-AS2
2.9191e-46	1.02629	0.633	0.184	1.50774e-41	7	40.8217	ENST00000390312	IGLV2-14
3.32439e-46	-5.47135	0.006	0.4	1.71708e-41	3	40.7652	ENST00000301457	NDUFA7
3.90616e-46	-1.47145	0.077	0.53	2.01757e-41	3	40.6952	ENST00000468822	SRRM1
5.98918e-46	-1.15348	0.162	0.305	3.09347e-41	0	40.5096	ENST00000612282
9.18663e-46	-1.86413	0.043	0.464	4.74499e-41	3	40.3238	ENST00000396776	GAPT
9.46518e-46	-4.97396	0.006	0.397	4.88886e-41	3	40.3108	ENST00000467681	SSBP1
9.74975e-46	-2.85339	0.023	0.43	5.03584e-41	3	40.2979	ENST00000369722	ATP5PB
1.29439e-45	-3.08102	0.014	0.413	6.68567e-41	3	40.1749	ENST00000435844	SMIM26
1.87454e-45	-1.35913	0.077	0.527	9.68219e-41	3	40.014	ENST00000318607	PABPC1
2.50162e-45	-2.69144	0.02	0.423	1.29211e-40	3	39.8887	ENST00000011691	SS18L2
2.63948e-45	-2.11561	0.048	0.471	1.36332e-40	3	39.8654	ENST00000379638	REEP5
2.71765e-45	-4.97485	0.006	0.395	1.40369e-40	3	39.8527	ENST00000229281	C12orf57
3.44553e-45	-4.89596	0.006	0.394	1.77965e-40	3	39.7497	ENST00000526319	MRPL49
3.94785e-45	-3.61251	0.009	0.4	2.0391e-40	3	39.6906	ENST00000338970	RPL14
4.33432e-45	-4.18591	0.006	0.393	2.23872e-40	3	39.65	ENST00000237858	GLRX
6.49515e-45	-2.97636	0.017	0.414	3.35481e-40	3	39.4743	ENST00000276689	NDUFB9
6.90362e-45	-2.06641	0.048	0.469	3.56579e-40	3	39.4478	ENST00000282032	ARL14EP
8.33244e-45	-3.2444	0.011	0.403	4.30379e-40	3	39.3661	ENST00000233025	SPCS1
8.41887e-45	2.12609	0.963	0.564	4.34843e-40	9	39.3617	ENST00000390237	IGKC
9.21182e-45	0.807234	0.347	0.174	4.758e-40	2	39.3226	ENST00000377669	KLF12
1.09469e-44	-2.24063	0.037	0.449	5.6542e-40	3	39.2476	ENST00000341423	HMGB1
1.13504e-44	0.693027	0.564	0.363	5.86257e-40	2	39.2319	ENST00000230056	GMNN
1.25276e-44	-1.34017	0.099	0.557	6.47061e-40	3	39.1891	ENST00000393085	MTPN
1.88576e-44	1.30602	0.872	0.948	9.74013e-40	3	39.0114	ENST00000361335	MT-ND4L
2.0828e-44	-1.42605	0.099	0.556	1.07579e-39	3	38.9683	ENST00000428908	BANK1
2.50789e-44	0.905404	0.378	0.201	1.29535e-39	2	38.8876	ENST00000376544	TLE4
3.9615e-44	0.585653	0.6	0.393	2.04615e-39	2	38.6891	ENST00000406263	CDK14
4.07131e-44	-3.03896	0.02	0.414	2.10287e-39	3	38.6772	ENST00000223136	FIS1
4.25509e-44	-2.14794	0.054	0.473	2.1978e-39	3	38.658	ENST00000294507	LAPTM5
4.79757e-44	-1.68908	0.068	0.498	2.478e-39	3	38.6059	ENST00000327839	CLECL1P
6.49449e-44	-2.82992	0.014	0.403	3.35447e-39	3	38.4744	ENST00000648513
7.33151e-44	-3.72221	0.014	0.401	3.7868e-39	3	38.4217	ENST00000305786	CYCS
7.95219e-44	1.08918	0.262	0.115	4.10739e-39	2	38.3864	ENST00000462804	EVI2A
8.23901e-44	2.50737	0.333	0.102	4.25553e-39	5	38.371	ENST00000637539	IGHM
9.96063e-44	0.761097	0.469	0.27	5.14477e-39	2	38.2886	ENST00000472053
1.00748e-43	-3.65128	0.011	0.395	5.20373e-39	3	38.2837	ENST00000343139	HLA-DQA1
1.11165e-43	-3.03654	0.02	0.411	5.7418e-39	3	38.241	ENST00000434651	HLA-DQB1
1.12062e-43	0.724952	0.402	0.216	5.78809e-39	2	38.2375	ENST00000389793	LYST
1.29094e-43	-2.53741	0.02	0.412	6.66784e-39	3	38.176	ENST00000314133	COX8A
1.51433e-43	-2.60371	0.028	0.427	7.82169e-39	3	38.1067	ENST00000549388	TNS2-AS1
2.19406e-43	-2.31733	0.04	0.444	1.13325e-38	3	37.9457	ENST00000342192	UBE2L3
2.52191e-43	-1.92822	0.045	0.456	1.30259e-38	3	37.8852	ENST00000534605	EIF4G2
2.95394e-43	-3.16346	0.017	0.404	1.52574e-38	3	37.8165	ENST00000312175	BANF1
3.01754e-43	-4.07385	0.014	0.395	1.55859e-38	3	37.8073	ENST00000408968	IFITM1
3.4837e-43	1.06935	0.265	0.119	1.79937e-38	2	37.7449	ENST00000508569	MEF2C
3.50699e-43	-1.66136	0.077	0.511	1.81139e-38	3	37.742	ENST00000330899	DNAJA1
4.11281e-43	-3.03372	0.028	0.42	2.12431e-38	3	37.6728	ENST00000368811	S100A10
1.54261e-42	-2.9462	0.017	0.399	7.96773e-38	3	37.0987	ENST00000360656	ATP6AP1-DT
1.92155e-42	0.812231	0.378	0.203	9.92502e-38	2	37.0033	ENST00000372718	SMAP2
4.20194e-42	0.68686	0.835	0.438	2.17034e-37	5	36.6635	ENST00000390325	IGLC3
6.82393e-42	-3.00808	0.017	0.394	3.52463e-37	3	36.4529	ENST00000409921	CAPG
8.60154e-42	-1.55827	0.074	0.497	4.44278e-37	3	36.3523	ENST00000232905	EIF1B
1.21522e-41	-2.49033	0.02	0.399	6.27672e-37	3	36.2023	ENST00000302422	TMEM256
1.61135e-41	-2.43139	0.037	0.429	8.32278e-37	3	36.0797	ENST00000372447	C9orf78
2.0172e-41	-3.11677	0.026	0.402	1.0419e-36	3	35.9822	ENST00000379542	TMEM14B
2.58462e-41	-2.58147	0.02	0.396	1.33498e-36	3	35.8745	ENST00000614145	MRPS21
3.01559e-41	-0.853263	0.156	0.627	1.55758e-36	3	35.8075	ENST00000337147	EZR
3.38729e-41	2.33415	0.611	0.462	1.74957e-36	3	35.7571	ENST00000333681	BCL2
7.92895e-41	-3.61265	0.108	0.495	4.09538e-36	3	35.3877	ENST00000390239	IGKJ4
1.02032e-40	-2.05092	0.034	0.42	5.27008e-36	3	35.2782	ENST00000610426	NSA2
1.02995e-40	-1.39008	0.08	0.5	5.31981e-36	3	35.2741	ENST00000314583	HCLS1
1.32082e-40	-2.36534	0.031	0.411	6.82217e-36	3	35.1661	ENST00000591899	UQCR11
1.52862e-40	0.651715	0.637	0.445	7.89549e-36	2	35.1026	ENST00000498020	HLA-DMB
2.19386e-40	-0.678588	0.625	0.748	1.13315e-35	2	34.9457	ENST00000511653	COPS4
2.25947e-40	-3.19159	0.02	0.389	1.16704e-35	3	34.9329	ENST00000376755	RBM3
2.80621e-40	-2.8609	0.011	0.374	1.44944e-35	3	34.8388	ENST00000368305	LAMTOR2
3.53722e-40	-2.23461	0.028	0.405	1.82701e-35	3	34.7383	ENST00000248451	PNKD
4.21128e-40	-3.13953	0.011	0.372	2.17517e-35	3	34.6625	ENST00000268220	SEC11A
4.78112e-40	-2.9734	0.014	0.376	2.4695e-35	3	34.6074	ENST00000555558	IFI27L2
4.99887e-40	-4.63815	0.006	0.361	2.58197e-35	3	34.588	ENST00000374077	ROMO1
9.03123e-40	0.463132	0.843	0.688	4.66472e-35	2	34.3312	ENST00000330927	EVI2B
1.43238e-39	-3.41111	0.011	0.369	7.39838e-35	3	34.1309	ENST00000335514	ATP5IF1
1.51743e-39	-2.14537	0.026	0.396	7.83769e-35	3	34.1058	ENST00000344843	MRPL20
1.61149e-39	0.845448	0.346	0.184	8.32353e-35	2	34.0797	ENST00000464301	SLC39A10
2.31796e-39	-1.83428	0.045	0.43	1.19725e-34	3	33.9218	ENST00000337002	SEC62
2.49815e-39	-2.5851	0.02	0.384	1.29032e-34	3	33.8893	ENST00000581232
2.87395e-39	-2.92804	0.251	0.582	1.48442e-34	5	33.8284	ENST00000390237	IGKC
4.3292e-39	-2.17872	0.043	0.421	2.23608e-34	3	33.6505	ENST00000256441	MRPS36
5.54777e-39	0.915552	0.912	0.737	2.86548e-34	4	33.5428	ENST00000368716	S100A4
6.06768e-39	-1.12472	0.129	0.255	3.13402e-34	0	33.5039	ENST00000330540	CD86
6.18232e-39	-2.39334	0.026	0.391	3.19323e-34	3	33.4958	ENST00000361365	EIF1AY
7.7746e-39	0.749429	0.371	0.2	4.01566e-34	2	33.3962	ENST00000327492	TOB2
1.33247e-38	-2.27662	0.048	0.427	6.88234e-34	3	33.1623	ENST00000648608	CD53
1.65498e-38	-3.31106	0.011	0.362	8.54813e-34	3	33.0681	ENST00000292614	POLR2J
1.94069e-38	-2.30821	0.026	0.388	1.00239e-33	3	32.999	ENST00000461708	SSB
2.64075e-38	-2.14817	0.026	0.387	1.36397e-33	3	32.8652	ENST00000380394	RPS6
3.10572e-38	-0.84563	0.304	0.482	1.60414e-33	2	32.7948	ENST00000390325	IGLC3
3.31518e-38	-3.34802	0.014	0.364	1.71232e-33	3	32.7664	ENST00000338639	PARK7
3.60462e-38	-3.58261	0.011	0.359	1.86182e-33	3	32.7301	ENST00000374202	IL2RG
3.81639e-38	-2.55419	0.023	0.38	1.9712e-33	3	32.7053	ENST00000395535	SEC61G
3.93988e-38	-2.30533	0.017	0.371	2.03499e-33	3	32.6914	ENST00000318388	NDUFV2
3.98789e-38	-3.03777	0.017	0.37	2.05978e-33	3	32.6862	ENST00000380635	TMSB4X
4.19765e-38	-2.90926	0.023	0.38	2.16813e-33	3	32.6639	ENST00000392246	SUMO1
5.07722e-38	-1.3454	0.088	0.499	2.62244e-33	3	32.5813	ENST00000582401	TXNIP
5.79044e-38	-2.44975	0.02	0.375	2.99082e-33	3	32.5242	ENST00000601419	SELENOW
5.81032e-38	0.628742	0.408	0.236	3.00109e-33	2	32.5227	ENST00000533454	UVRAG
5.976e-38	0.794296	0.895	0.442	3.08666e-33	6	32.5105	ENST00000390325	IGLC3
6.38055e-38	-1.51168	0.048	0.424	3.29562e-33	3	32.4821	ENST00000343677	H1-2
7.53138e-38	-1.87818	0.034	0.4	3.89003e-33	3	32.41	ENST00000594708	SMC5-DT
1.52858e-37	-5.26454	0.006	0.343	7.89526e-33	3	32.1026	ENST00000396060	GTF2A2
1.59854e-37	-1.57425	0.062	0.447	8.2566e-33	3	32.0832	ENST00000337859	ZC3H15
1.64621e-37	-2.99498	0.017	0.366	8.50286e-33	3	32.0704	ENST00000261700	RTRAF
3.61098e-37	-3.84008	0.011	0.352	1.86511e-32	3	31.7293	ENST00000549970	VPS29
4.21439e-37	-2.42447	0.02	0.369	2.17678e-32	3	31.6622	ENST00000215565	NDUFB7
5.36646e-37	-5.8734	0.003	0.335	2.77183e-32	3	31.5572	ENST00000290541	PSMB4
7.36393e-37	0.624001	0.51	0.318	3.80355e-32	2	31.4198	ENST00000422622	SSPN
1.05571e-36	-5.46208	0.003	0.333	5.45285e-32	3	31.2634	ENST00000398884	TOMM6
1.06321e-36	0.449187	0.78	0.616	5.4916e-32	2	31.2603	ENST00000443035	DENND4A
1.35137e-36	-0.257253	0.994	0.953	6.97994e-32	2	31.1561	ENST00000392222	EEF1B2
1.36777e-36	-3.97111	0.009	0.343	7.06466e-32	3	31.1509	ENST00000234301	COX7A2L
1.73855e-36	-3.1508	0.017	0.358	8.97976e-32	3	31.0467	ENST00000617763	NDUFA6
1.96964e-36	-3.92781	0.011	0.347	1.01734e-31	3	30.9925	ENST00000224237	VIM
2.08951e-36	-2.73464	0.017	0.358	1.07925e-31	3	30.9669	ENST00000344063	RPL28
2.51885e-36	-3.22842	0.014	0.352	1.30101e-31	3	30.8857	ENST00000536388	CD27-AS1
2.62967e-36	-0.846399	0.119	0.549	1.35825e-31	3	30.867	ENST00000322953	BANK1
3.79305e-36	-3.49776	0.136	0.489	1.95915e-31	3	30.7079	ENST00000390323	IGLC2
4.60611e-36	0.552652	0.426	0.249	2.3791e-31	2	30.6236	ENST00000254480	SMARCC1
7.10586e-36	-2.31783	0.031	0.379	3.67025e-31	3	30.4353	ENST00000375706
7.80976e-36	-0.675512	0.099	0.509	4.03382e-31	3	30.3943	ENST00000293831	EIF4A1
7.83616e-36	-2.04801	0.02	0.359	4.04745e-31	3	30.3928	ENST00000301522	PRDX2
9.20853e-36	-1.82096	0.017	0.354	4.7563e-31	3	30.3227	ENST00000272102	ARF1
1.73343e-35	0.599071	0.563	0.376	8.95334e-31	2	30.048	ENST00000406337	KAT6A
1.76096e-35	-1.95014	0.04	0.391	9.09555e-31	3	30.0412	ENST00000356978	CALM1
2.24938e-35	-1.72417	0.034	0.384	1.16183e-30	3	29.9349	ENST00000373715	SRSF3
2.42577e-35	-1.82236	0.045	0.403	1.25294e-30	3	29.9021	ENST00000557089	HSP90AA1
2.87966e-35	-2.00689	0.045	0.398	1.48737e-30	3	29.8276	ENST00000433866	HSBP1
3.0494e-35	-3.87915	0.174	0.487	1.57504e-30	4	29.8027	ENST00000390323	IGLC2
3.4928e-35	-3.18155	0.014	0.344	1.80407e-30	3	29.7437	ENST00000411630	DANCR
3.51167e-35	-2.11829	0.02	0.355	1.81381e-30	3	29.7414	ENST00000549370	RPL18
3.75374e-35	-3.8452	0.011	0.338	1.93885e-30	3	29.7125	ENST00000366607	TOMM20
5.49141e-35	-3.37219	0.011	0.337	2.83637e-30	3	29.5472	ENST00000265462	PRDX5
6.05724e-35	-2.2469	0.028	0.369	3.12863e-30	3	29.5046	ENST00000483581	TOMM7
7.0766e-35	-3.51408	0.009	0.331	3.65513e-30	3	29.4371	ENST00000353107	POLR2K
7.34725e-35	-4.07472	0.006	0.326	3.79493e-30	3	29.4208	ENST00000295491	MRPS18C
9.58916e-35	-4.99518	0.006	0.324	4.9529e-30	3	29.3051	ENST00000392508	DYNLL1
1.29283e-34	0.789207	0.38	0.223	6.6776e-30	2	29.1754	ENST00000650983	SELL
1.34885e-34	-2.98651	0.241	0.584	6.96694e-30	3	29.157	ENST00000390237	IGKC
1.63248e-34	-2.53641	0.145	0.466	8.43194e-30	4	29.0741	ENST00000390325	IGLC3
1.6636e-34	-0.481432	0.772	0.851	8.59266e-30	0	29.0659	ENST00000508653	BANK1
1.71253e-34	0.59664	0.526	0.344	8.84541e-30	2	29.0533	ENST00000487145	CDK14
1.92937e-34	0.607314	0.447	0.274	9.96537e-30	2	29.0015	ENST00000646039	CDK13
2.15237e-34	0.743991	0.803	0.277	1.11172e-29	8	28.954	ENST00000498435	IGKV1-27
2.46196e-34	-2.40197	0.02	0.349	1.27163e-29	3	28.8956	ENST00000497519	RPL5
2.87094e-34	2.21162	0.608	0.517	1.48287e-29	3	28.8289	ENST00000313708	EBF1
2.93586e-34	0.871679	0.282	0.144	1.5164e-29	2	28.8192	ENST00000398805	HSDL2
2.98863e-34	-1.81592	0.034	0.375	1.54366e-29	3	28.8114	ENST00000389912	COX16
3.12036e-34	-1.11688	0.082	0.461	1.6117e-29	3	28.7927	ENST00000354480	RBM3
4.15785e-34	-0.691167	0.413	0.54	2.14757e-29	0	28.6681	ENST00000372195	RAPGEF1
5.24368e-34	0.562265	0.727	0.539	2.70841e-29	2	28.5673	ENST00000390237	IGKC
1.02225e-33	-4.37052	0.009	0.322	5.28003e-29	3	28.2774	ENST00000552039	RNASEK
1.02438e-33	-3.05123	0.009	0.323	5.291e-29	3	28.2765	ENST00000271324	CD53
1.5334e-33	0.470129	0.479	0.305	7.92018e-29	2	28.1013	ENST00000460591	MBNL1
2.27819e-33	0.830712	0.258	0.127	1.17671e-28	2	27.9293	ENST00000465522	ITGA4
2.58518e-33	-0.803453	0.207	0.649	1.33527e-28	3	27.8744	ENST00000574081	SCIMP
3.14532e-33	1.33761	1	0.447	1.62459e-28	11	27.7893	ENST00000390325	IGLC3
3.78877e-33	1.53765	0.685	0.688	1.95694e-28	3	27.7084	ENST00000295095	ARHGAP15
3.97201e-33	-2.70996	0.009	0.319	2.05158e-28	3	27.6879	ENST00000296581	LSM6
6.08593e-33	0.811974	0.89	0.463	3.14344e-28	6	27.5026	ENST00000390323	IGLC2
6.17703e-33	0.858607	0.262	0.131	3.1905e-28	2	27.4961	ENST00000490230	PBXIP1
7.8326e-33	-3.41714	0.011	0.322	4.04561e-28	3	27.393	ENST00000309324	MICOS13
9.00225e-33	0.328908	0.653	0.446	4.64975e-28	2	27.3326	ENST00000390239	IGKJ4
9.59908e-33	-1.114	0.074	0.438	4.95802e-28	3	27.3047	ENST00000374980	EIF2S2
1.00311e-32	-1.84686	0.147	0.493	5.18114e-28	5	27.2856	ENST00000390239	IGKJ4
1.79153e-32	-2.46424	0.026	0.346	9.25341e-28	3	27.0337	ENST00000547969	NAP1L1
3.54928e-32	-1.78284	0.034	0.361	1.83324e-27	3	26.7368	ENST00000391959	PPP1R12B
4.47474e-32	-2.20787	0.026	0.343	2.31125e-27	3	26.6362	ENST00000330133	MRPL54
6.32432e-32	-1.55704	0.057	0.395	3.26657e-27	3	26.4859	ENST00000244534	H1-3
7.1948e-32	-2.90509	0.017	0.325	3.71619e-27	3	26.4299	ENST00000342166	DPY30
7.71156e-32	-3.00701	0.006	0.304	3.9831e-27	3	26.3998	ENST00000371470	MAGOH
8.68507e-32	-2.00534	0.017	0.324	4.48593e-27	3	26.3481	ENST00000577407	RPL23
9.11142e-32	0.814973	0.306	0.167	4.70614e-27	2	26.3273	ENST00000666473
1.16107e-31	-3.29109	0.011	0.313	5.99706e-27	3	26.2221	ENST00000367034	MRPL18
1.1767e-31	-3.64208	0.009	0.307	6.07776e-27	3	26.2163	ENST00000370645	GNG5
1.45956e-31	-0.906813	0.156	0.273	7.53876e-27	0	26.1227	ENST00000372734	ADK
2.12293e-31	-3.09978	0.014	0.317	1.09651e-26	3	25.96	ENST00000538142	SSPN
2.17787e-31	-3.77406	0.011	0.311	1.12489e-26	3	25.9489	ENST00000280326	CCT5
2.28814e-31	-1.96989	0.017	0.322	1.18185e-26	3	25.9274	ENST00000548222	PCED1B-AS1
2.63348e-31	-2.81713	0.017	0.321	1.36022e-26	3	25.8664	ENST00000373586	EIF3I
2.94944e-31	0.623411	0.439	0.275	1.52341e-26	2	25.8172	ENST00000603037	FTX
3.33014e-31	-2.84196	0.014	0.314	1.72005e-26	3	25.7645	ENST00000472053
3.68101e-31	-3.03037	0.014	0.315	1.90128e-26	3	25.721	ENST00000244520	SNRPC
4.02207e-31	-3.24755	0.009	0.304	2.07744e-26	3	25.6825	ENST00000531120	EIF3M
4.4153e-31	0.647343	0.44	0.278	2.28055e-26	2	25.642	ENST00000538142	SSPN
4.74831e-31	-3.64654	0.006	0.298	2.45255e-26	3	25.6104	ENST00000379847	NDUFB6
5.25129e-31	-1.6868	0.04	0.362	2.71234e-26	3	25.5667	ENST00000425441	CCDC12
6.55662e-31	-3.9533	0.009	0.302	3.38656e-26	3	25.4702	ENST00000372833	CHCHD1
7.01014e-31	-4.80845	0.006	0.296	3.62081e-26	3	25.4412	ENST00000429243	PRR13
9.15107e-31	0.758606	0.273	0.144	4.72662e-26	2	25.3254	ENST00000273398	ATP6V1A
1.48783e-30	0.321215	0.969	0.864	7.6848e-26	2	25.1144	ENST00000311672	UQCRH
1.76533e-30	-1.8172	0.043	0.363	9.11811e-26	3	25.0401	ENST00000373237	PSMB2
1.7754e-30	-1.33624	0.051	0.379	9.17013e-26	3	25.0376	ENST00000252593	BST2
1.80628e-30	-0.784468	0.131	0.521	9.32964e-26	3	25.0301	ENST00000540870	SP110
2.75909e-30	-3.46553	0.156	0.466	1.4251e-25	3	24.8462	ENST00000390325	IGLC3
2.99195e-30	-1.59507	0.054	0.38	1.54537e-25	3	24.811	ENST00000306368	RNF181
3.24976e-30	0.622837	0.284	0.153	1.67853e-25	2	24.7751	ENST00000436577	CDK14
3.4461e-30	-3.10549	0.011	0.302	1.77994e-25	3	24.7496	ENST00000336023	TUBA1B
3.6078e-30	-1.57707	0.057	0.388	1.86346e-25	3	24.7297	ENST00000248437	TUBA4A
4.32501e-30	2.46645	0.531	0.401	2.23391e-25	3	24.6509	ENST00000367854	RCSD1
5.89254e-30	-3.17015	0.02	0.314	3.04356e-25	3	24.5166	ENST00000301071	TUBA1A
7.91582e-30	-3.22128	0.011	0.3	4.0886e-25	3	24.3884	ENST00000553300	HNRNPC
9.35529e-30	-4.46955	0.003	0.282	4.8321e-25	3	24.3159	ENST00000274606	NHP2
9.74481e-30	-2.10941	0.023	0.32	5.03329e-25	3	24.2981	ENST00000442744	UBA52
1.00234e-29	-5.06181	0.21	0.578	5.17718e-25	6	24.2859	ENST00000390237	IGKC
1.02683e-29	0.420159	0.751	0.58	5.30367e-25	2	24.2754	ENST00000337147	EZR
1.03944e-29	0.755605	0.296	0.159	5.36883e-25	2	24.2701	ENST00000366928	LYPLAL1
1.05398e-29	-5.39127	0.003	0.282	5.44389e-25	3	24.2641	ENST00000414075	GAS5
1.20688e-29	-2.52141	0.014	0.304	6.23366e-25	3	24.2053	ENST00000494074	MGST3
1.22104e-29	0.634419	0.475	0.321	6.30679e-25	2	24.2002	ENST00000511382	PDE4D
1.33478e-29	-2.19856	0.017	0.309	6.89428e-25	3	24.1615	ENST00000600974
1.36175e-29	-2.95348	0.009	0.292	7.03357e-25	3	24.1528	ENST00000394332	RPL23
1.62612e-29	-2.72907	0.017	0.308	8.39908e-25	3	24.0758	ENST00000009530	CD74
1.7202e-29	-0.93464	0.316	0.427	8.88499e-25	1	24.0513	ENST00000507116	PDE4D
1.89908e-29	-3.2978	0.009	0.291	9.80893e-25	3	24.0084	ENST00000450169	LSM5
1.98738e-29	-3.05198	0.014	0.301	1.0265e-24	3	23.9886	ENST00000226798	FRG1
2.01084e-29	-0.538577	0.301	0.778	1.03862e-24	3	23.9835	ENST00000540698	DDX5
2.2448e-29	-3.2298	0.009	0.29	1.15946e-24	3	23.9357	ENST00000246071	SNRPB2
2.25495e-29	0.556974	0.485	0.32	1.16471e-24	2	23.9338	ENST00000357066	MOB3A
3.59884e-29	0.896041	0.407	0.259	1.85884e-24	2	23.7308	ENST00000390247	IGKV3-7
3.60743e-29	-4.02314	0.006	0.283	1.86327e-24	3	23.7297	ENST00000587834	SEC11C
4.8996e-29	-3.50709	0.009	0.288	2.53069e-24	3	23.5968	ENST00000261479	PSMA6
5.43147e-29	0.664936	0.363	0.218	2.80541e-24	2	23.552	ENST00000634222	CPNE5
5.46003e-29	-2.93582	0.014	0.298	2.82016e-24	3	23.5497	ENST00000522209	PNOC
5.65508e-29	-2.39004	0.026	0.32	2.92091e-24	3	23.5345	ENST00000525675	C11orf98
8.1176e-29	0.6908	0.338	0.196	4.19282e-24	2	23.3775	ENST00000504921	MEF2C
8.35025e-29	-3.82549	0.009	0.286	4.31299e-24	3	23.3652	ENST00000555619	NPC2
9.26996e-29	0.622853	0.428	0.269	4.78803e-24	2	23.3198	ENST00000428670	ATP2B1
1.06969e-28	-1.10098	0.091	0.435	5.52506e-24	3	23.2577	ENST00000423313	KIAA0040
1.17417e-28	2.6577	0.438	0.269	6.0647e-24	3	23.2172	ENST00000647309	RIPOR2
1.22113e-28	-3.34979	0.009	0.285	6.30726e-24	3	23.2002	ENST00000300030	CIAO2A
1.31131e-28	-3.23847	0.009	0.285	6.77304e-24	3	23.1692	ENST00000216455	PSMA3
1.53187e-28	-2.52236	0.02	0.305	7.91227e-24	3	23.1017	ENST00000468582	LAMTOR4
1.71224e-28	-3.61377	0.009	0.283	8.84388e-24	3	23.0534	ENST00000579446	RPL36
2.13095e-28	-5.58304	0.003	0.272	1.10066e-23	3	22.9583	ENST00000341369	PTMA
2.56867e-28	-3.73927	0.011	0.287	1.32674e-23	3	22.8772	ENST00000299300	CCT2
2.81064e-28	-2.39342	0.017	0.298	1.45172e-23	3	22.8381	ENST00000401959	SNU13
3.08504e-28	0.318503	0.888	0.745	1.59345e-23	2	22.7977	ENST00000314675	UBXN11
3.11229e-28	-0.651798	0.094	0.442	1.60753e-23	3	22.7938	ENST00000300413	SNRPD1
3.12502e-28	-1.08067	0.077	0.408	1.6141e-23	3	22.7921	ENST00000366794	PARP1
3.18701e-28	-2.48395	0.02	0.301	1.64612e-23	3	22.7835	ENST00000279839	CWC15
4.17528e-28	-0.635612	0.444	0.562	2.15657e-23	0	22.6662	ENST00000643927	PRKCB
4.61708e-28	-2.76448	0.026	0.31	2.38477e-23	3	22.6226	ENST00000543780
5.49059e-28	0.769453	0.288	0.16	2.83594e-23	2	22.5473	ENST00000407008	NLK
5.79127e-28	-2.31204	0.02	0.302	2.99125e-23	3	22.5241	ENST00000395422	CHCHD2
6.46307e-28	-1.27015	0.031	0.323	3.33824e-23	3	22.4765	ENST00000568506	CORO1A-AS1
7.4193e-28	-2.83803	0.003	0.268	3.83214e-23	3	22.4166	ENST00000374206	CDC26
7.86673e-28	-2.83582	0.009	0.278	4.06324e-23	3	22.3911	ENST00000466444	RWDD1
1.47717e-27	-3.35462	0.006	0.271	7.62972e-23	3	22.1175	ENST00000375549	SDHD
1.53146e-27	-4.69988	0.003	0.265	7.91016e-23	3	22.1018	ENST00000404735	RPS27A
1.80717e-27	-3.08473	0.011	0.281	9.33419e-23	3	22.0299	ENST00000343262	RPS2
1.8953e-27	-3.4169	0.006	0.27	9.78942e-23	3	22.0092	ENST00000367660	ABRACL
2.0611e-27	-3.7749	0.006	0.27	1.06458e-22	3	21.9728	ENST00000664196	PIN4
3.7127e-27	-1.95712	0.02	0.295	1.91765e-22	3	21.7172	ENST00000261652	TNFRSF13B
3.87386e-27	-0.682346	0.349	0.498	2.00089e-22	2	21.6988	ENST00000390323	IGLC2
4.04717e-27	-2.43338	0.011	0.279	2.0904e-22	3	21.6798	ENST00000347519	CHMP4A
4.21479e-27	0.410645	0.546	0.38	2.17698e-22	2	21.6621	ENST00000538035	RIPOR2
4.30416e-27	-2.10925	0.023	0.299	2.22314e-22	3	21.653	ENST00000340385	PRDX6
4.35928e-27	0.497259	0.32	0.184	2.25161e-22	2	21.6475	ENST00000513414	PARP8
5.99923e-27	-2.31806	0.017	0.288	3.09866e-22	3	21.5088	ENST00000372692	SET
7.74955e-27	-1.99354	0.02	0.293	4.00272e-22	3	21.3976	ENST00000507606	STMP1
8.45681e-27	-3.77075	0.006	0.265	4.36803e-22	3	21.3597	ENST00000221859	POLR2I
8.80955e-27	1.89776	0.577	0.496	4.55022e-22	3	21.342	ENST00000372195	RAPGEF1
1.09418e-26	-4.49011	0.11	0.488	5.65152e-22	6	21.2478	ENST00000390239	IGKJ4
1.15952e-26	-5.45857	0.003	0.258	5.98906e-22	3	21.2226	ENST00000356708	ATP5F1C
1.37527e-26	0.349651	0.622	0.454	7.10341e-22	2	21.1485	ENST00000429124	FTX
1.46866e-26	0.287704	0.966	0.885	7.58576e-22	2	21.12	ENST00000217652	MYL12A
1.63293e-26	-4.03038	0.006	0.262	8.43427e-22	3	21.074	ENST00000284818	LY96
1.85985e-26	-3.02779	0.009	0.268	9.6063e-22	3	21.0174	ENST00000562929	COX4I1
1.86637e-26	-2.39208	0.028	0.304	9.64001e-22	3	21.0159	ENST00000517490	CPNE3
1.97222e-26	3.26552	0.318	0.151	1.01867e-21	3	20.992	ENST00000460472	TTN
2.27256e-26	2.18573	0.289	0.071	1.1738e-21	7	20.9304	ENST00000390559	IGHM
2.30364e-26	-4.00692	0.006	0.261	1.18985e-21	3	20.9245	ENST00000397261	ARPC4
4.1563e-26	-3.26377	0.009	0.265	2.14677e-21	3	20.6682	ENST00000409393	CRIP1
6.45607e-26	-1.07708	0.068	0.373	3.33462e-21	3	20.477	ENST00000479176	FXR1
6.6583e-26	2.28489	0.517	0.401	3.43908e-21	3	20.4636	ENST00000518552
7.58822e-26	-1.28429	0.031	0.307	3.91939e-21	3	20.4068	ENST00000374358	TMEM50A
9.40641e-26	0.335446	0.661	0.498	4.8585e-21	2	20.3135	ENST00000643927	PRKCB
9.64786e-26	-2.68024	0.011	0.267	4.98322e-21	3	20.3025	ENST00000361564	OSTC
1.50498e-25	0.474252	0.46	0.304	7.77337e-21	2	20.1094	ENST00000369577	ZNF292
1.51855e-25	-1.96462	0.037	0.312	7.84346e-21	3	20.1055	ENST00000530028	EID1
1.83326e-25	-1.89644	0.023	0.285	9.46899e-21	3	20.0237	ENST00000258424	COX5B
2.37654e-25	-1.87364	0.034	0.306	1.22751e-20	3	19.911	ENST00000293860	POLR3K
2.42641e-25	1.54592	0.665	0.671	1.25326e-20	3	19.902	ENST00000415888	RALGPS2
3.52519e-25	-2.7904	0.017	0.272	1.82079e-20	3	19.7397	ENST00000248948	VPREB3
4.06403e-25	-0.567049	0.236	0.642	2.09911e-20	3	19.678	ENST00000367091	FCMR
4.09877e-25	0.603557	0.254	0.137	2.11705e-20	2	19.6743	ENST00000464001	ITGB1
5.22524e-25	-0.290445	0.153	0.52	2.69889e-20	3	19.5688	ENST00000429133	XRCC5
5.25447e-25	0.6435	0.3	0.174	2.71399e-20	2	19.5664	ENST00000261173
5.2811e-25	-3.17175	0.009	0.256	2.72774e-20	3	19.5642	ENST00000374450	EIF6
6.02796e-25	-3.30727	0.009	0.255	3.1135e-20	3	19.5068	ENST00000393033	GIPC1
7.07194e-25	0.436505	0.637	0.482	3.65273e-20	2	19.4374	ENST00000620766	LINC00926
1.258e-24	0.636034	0.342	0.209	6.4977e-20	2	19.1872	ENST00000461422	CFLAR
1.29009e-24	-2.57783	0.011	0.258	6.66345e-20	3	19.1763	ENST00000455385	SYPL1
1.33568e-24	-3.15154	0.023	0.276	6.8989e-20	3	19.1612	ENST00000373408	CCDC167
1.79227e-24	-2.34081	0.017	0.267	9.25725e-20	3	19.0335	ENST00000330914	TUBB
2.01859e-24	0.580647	0.252	0.138	1.04262e-19	2	18.9819	ENST00000469197	DOCK8
2.03597e-24	-2.03962	0.031	0.293	1.0516e-19	3	18.9781	ENST00000379666	MRPL33
2.14815e-24	-1.71586	0.04	0.308	1.10954e-19	3	18.9549	ENST00000602520	SNHG8
2.46709e-24	-1.27033	0.04	0.31	1.27428e-19	3	18.8947	ENST00000412585	HLA-B
2.61079e-24	0.604313	0.483	0.343	1.3485e-19	2	18.8701	ENST00000392246	SUMO1
2.74437e-24	-2.20019	0.023	0.277	1.41749e-19	3	18.8485	ENST00000438763	HLA-DOB
3.10483e-24	-2.93466	0.009	0.25	1.60367e-19	3	18.7949	ENST00000270792	SH3BGRL3
3.30325e-24	-0.555254	0.105	0.427	1.70616e-19	3	18.768	ENST00000221561	TLE5
3.43835e-24	0.485014	0.506	0.351	1.77594e-19	2	18.7506	ENST00000237858	GLRX
3.56897e-24	0.607347	0.318	0.192	1.84341e-19	2	18.7344	ENST00000609692	CELF2
4.00523e-24	-1.34511	0.028	0.287	2.06874e-19	3	18.6843	ENST00000263672	SPCS2
4.03288e-24	0.65831	0.383	0.245	2.08302e-19	2	18.6813	ENST00000438510	HLA-DMB
4.43599e-24	-2.93875	0.017	0.264	2.29123e-19	3	18.6399	ENST00000312547	CHMP2A
5.38036e-24	-2.96625	0.014	0.258	2.77901e-19	3	18.5561	ENST00000313117	SRSF7
5.41628e-24	0.441772	0.588	0.43	2.79756e-19	2	18.5532	ENST00000294507	LAPTM5
5.56638e-24	0.519654	0.318	0.19	2.87509e-19	2	18.5413	ENST00000398398	MBD2
5.67124e-24	2.30758	0.457	0.314	2.92925e-19	3	18.5332	ENST00000421035	UTRN
7.29118e-24	-1.26533	0.065	0.351	3.76597e-19	3	18.4241	ENST00000468747	FAM107B
7.92177e-24	-2.0041	0.026	0.279	4.09167e-19	3	18.3881	ENST00000562726
8.05449e-24	-1.33226	0.045	0.316	4.16022e-19	3	18.3809	ENST00000621663	ANAPC16
8.22726e-24	-2.48135	0.023	0.272	4.24946e-19	3	18.3717	ENST00000304677	RNASE6
8.96813e-24	-1.90066	0.014	0.257	4.63213e-19	3	18.3342	ENST00000194214	IFT25
9.79166e-24	-0.722785	0.065	0.354	5.05749e-19	3	18.2961	ENST00000594442
9.97619e-24	-2.94334	0.017	0.26	5.1528e-19	3	18.288	ENST00000253233	MTRFR
1.08439e-23	-2.18834	0.017	0.26	5.60096e-19	3	18.2517	ENST00000371419	PFDN4
1.08561e-23	-0.941446	0.114	0.429	5.60727e-19	3	18.2512	ENST00000264538	IFT57
1.16263e-23	0.705341	0.273	0.155	6.00508e-19	2	18.2215	ENST00000437473	MEF2C
1.23537e-23	-2.06835	0.026	0.277	6.38083e-19	3	18.1951	ENST00000255764	MED10
1.29576e-23	-1.54156	0.014	0.256	6.69274e-19	3	18.1744	ENST00000595545	FBL
1.30142e-23	0.463305	0.589	0.442	6.72198e-19	2	18.1725	ENST00000443565	LINC01781
1.38902e-23	2.00134	0.557	0.484	7.17441e-19	3	18.1442	ENST00000651074
1.39015e-23	-2.13613	0.02	0.266	7.18025e-19	3	18.1439	ENST00000471696	SELENOT
1.41172e-23	-0.648353	0.604	0.674	7.29169e-19	2	18.1372	ENST00000234816	ANGPTL1
1.563e-23	-0.538889	0.557	0.675	8.07306e-19	2	18.093	ENST00000311507	PLAC8
1.72718e-23	-1.23108	0.045	0.312	8.92108e-19	3	18.0496	ENST00000328649	CIB1
1.73557e-23	-0.733003	0.276	0.379	8.9644e-19	0	18.0475	ENST00000511382	PDE4D
1.77934e-23	-1.62022	0.02	0.265	9.19047e-19	3	18.0367	ENST00000520348	SNHG6
2.10022e-23	0.809484	0.978	0.468	1.08478e-18	11	17.9647	ENST00000390323	IGLC2
2.68217e-23	-1.2489	0.034	0.291	1.38537e-18	3	17.8584	ENST00000302979	POLR1D
2.88927e-23	-4.5812	0.229	0.576	1.49233e-18	7	17.8261	ENST00000390237	IGKC
3.85878e-23	-0.464012	0.578	0.673	1.9931e-18	0	17.7005	ENST00000443035	DENND4A
4.06915e-23	-2.51039	0.014	0.251	2.10175e-18	3	17.6774	ENST00000368884	PSMD4
4.65246e-23	-1.5896	0.031	0.283	2.40304e-18	3	17.6192	ENST00000337682	SINHCAF
4.93168e-23	-0.95631	0.037	0.293	2.54726e-18	3	17.5939	ENST00000612311	TMCO1
4.97509e-23	-2.44153	0.02	0.261	2.56968e-18	3	17.5901	ENST00000520517	COX6C
5.01678e-23	2.29634	0.457	0.328	2.59122e-18	3	17.5865	ENST00000460591	MBNL1
5.35252e-23	1.76419	0.651	0.678	2.76463e-18	3	17.5584	ENST00000549727	ATP2B1
6.45697e-23	0.685823	1	1	3.33509e-18	3	17.4769	ENST00000534336	MALAT1
8.88385e-23	-4.1976	0.048	0.293	4.5886e-18	3	17.3383	ENST00000390247	IGKV3-7
9.73585e-23	0.550694	0.405	0.268	5.02866e-18	2	17.2985	ENST00000371727	EPS15
1.1897e-22	0.641523	0.281	0.163	6.14493e-18	2	17.2115	ENST00000560997	SNX22
1.19663e-22	-0.724458	0.077	0.363	6.18074e-18	3	17.209	ENST00000264192	CYTIP
1.33415e-22	0.704601	0.861	0.678	6.89102e-18	4	17.1617	ENST00000496817	S100A6
1.51091e-22	0.364236	0.393	0.254	7.80399e-18	2	17.1077	ENST00000647309	RIPOR2
1.65547e-22	-0.693853	0.29	0.391	8.55068e-18	0	17.068	ENST00000264170	KYNU
1.84008e-22	0.52008	0.287	0.168	9.5042e-18	2	17.0221	ENST00000229812	STK38
2.11254e-22	-1.326	0.031	0.278	1.09115e-17	3	16.9621	ENST00000361441	APOBEC3C
2.21611e-22	-1.89407	0.031	0.277	1.14464e-17	3	16.9413	ENST00000438510	HLA-DMB
2.55555e-22	-1.26342	0.057	0.323	1.31997e-17	3	16.8794	ENST00000223129	RPA3
2.67762e-22	1.59069	0.656	0.665	1.38302e-17	3	16.8592	ENST00000336755	ZCCHC7
3.17033e-22	0.561842	0.261	0.148	1.63751e-17	2	16.7858	ENST00000489615	RABGAP1L
3.28826e-22	0.382677	0.433	0.294	1.69842e-17	2	16.77	ENST00000493459	MBNL1
3.41884e-22	-1.87459	0.031	0.276	1.76586e-17	3	16.753	ENST00000175091	LAPTM4A
3.46758e-22	0.61735	0.273	0.161	1.79104e-17	2	16.7469	ENST00000319357	STK17A
3.78379e-22	-1.05871	0.065	0.336	1.95437e-17	3	16.709	ENST00000601116
4.1098e-22	-1.09736	0.043	0.296	2.12275e-17	3	16.6731	ENST00000301788	POLR2G
5.72853e-22	-1.10028	0.065	0.336	2.95884e-17	3	16.5289	ENST00000397149	SMU1
6.47646e-22	-0.485455	0.33	0.438	3.34516e-17	0	16.4756	ENST00000368811	S100A10
9.33224e-22	-0.611935	0.357	0.459	4.82019e-17	0	16.3169	ENST00000406263	CDK14
9.64853e-22	-0.339937	0.992	0.989	4.98356e-17	2	16.3025	ENST00000361390	MT-ND1
9.7728e-22	-1.22066	0.057	0.319	5.04775e-17	3	16.2969	ENST00000616787
1.02351e-21	0.450843	0.375	0.244	5.28655e-17	2	16.2768	ENST00000518486	FBXL17
1.09552e-21	-0.984851	0.065	0.332	5.65848e-17	3	16.2473	ENST00000309922	TRMT10C
1.58017e-21	-2.32831	0.023	0.253	8.16174e-17	3	16.0882	ENST00000381342	SNRPB
1.81012e-21	-1.70087	0.023	0.252	9.34943e-17	3	16.0292	ENST00000422453	CNBP
1.81843e-21	-1.1215	0.026	0.259	9.39238e-17	3	16.0272	ENST00000263645	CD81
2.29954e-21	-1.19647	0.166	0.28	1.18774e-16	2	15.9253	ENST00000304677	RNASE6
2.47208e-21	2.2257	0.457	0.342	1.27685e-16	3	15.8939	ENST00000608190
2.61447e-21	-1.93071	0.026	0.257	1.3504e-16	3	15.8695	ENST00000295685	ARPC2
2.63693e-21	-2.55754	0.026	0.255	1.362e-16	3	15.8658	ENST00000356971	CILK1
3.1183e-21	-3.31026	0.057	0.294	1.61063e-16	3	15.793	ENST00000498435	IGKV1-27
3.39999e-21	-0.310627	1	0.999	1.75613e-16	2	15.7554	ENST00000361227	MT-ND3
3.93448e-21	0.318015	0.81	0.704	2.0322e-16	2	15.692	ENST00000378024	AHNAK
4.05461e-21	-2.22237	0.028	0.259	2.09425e-16	3	15.679	ENST00000298299	ZNF22
4.15333e-21	0.668181	0.266	0.157	2.14524e-16	2	15.6685	ENST00000559664	SLC12A6
4.98284e-21	0.280066	0.877	0.787	2.57369e-16	2	15.5894	ENST00000518797	CD74
5.49408e-21	-0.499964	0.495	0.588	2.83775e-16	0	15.547	ENST00000356136	UVRAG
5.55445e-21	1.88651	0.56	0.523	2.86893e-16	3	15.5423	ENST00000643927	PRKCB
5.65387e-21	0.457757	0.496	0.354	2.92028e-16	2	15.5346	ENST00000356978	CALM1
6.00426e-21	-0.838092	0.071	0.338	3.10126e-16	3	15.5085	ENST00000258960	NMT1
6.40959e-21	0.259579	0.944	0.843	3.31062e-16	2	15.4801	ENST00000616760	CLIC1
6.4325e-21	-0.758591	0.266	0.365	3.32245e-16	0	15.4785	ENST00000460591	MBNL1
6.7556e-21	0.523003	0.28	0.166	3.48933e-16	2	15.4573	ENST00000480996	KDM4C
9.12034e-21	-4.17796	0.133	0.486	4.71074e-16	7	15.3269	ENST00000390239	IGKJ4
1.01158e-20	0.292521	0.424	0.286	5.22493e-16	2	15.2819	ENST00000522582
1.05781e-20	1.90626	0.56	0.526	5.46369e-16	3	15.2625	ENST00000477383
1.06439e-20	0.623889	0.283	0.172	5.49767e-16	2	15.2598	ENST00000353267	CREB1
1.26738e-20	0.385331	0.396	0.261	6.54615e-16	2	15.184	ENST00000571289	PAFAH1B1
1.6975e-20	0.267826	0.765	0.635	8.76775e-16	2	15.0571	ENST00000645517	PRKCB
2.0263e-20	-1.15665	0.048	0.292	1.04661e-15	3	14.9802	ENST00000261313	PEBP1
2.09743e-20	-1.34032	0.037	0.27	1.08334e-15	3	14.9652	ENST00000261890	RAB11A
2.53144e-20	0.405298	0.434	0.297	1.30752e-15	2	14.8836	ENST00000616070	HSH2D
2.76698e-20	2.03724	0.494	0.407	1.42917e-15	3	14.8449	ENST00000489243	KDM4C
2.9157e-20	0.667231	0.276	0.168	1.50599e-15	2	14.8222	ENST00000261401	CORO1C
2.91745e-20	-1.49627	0.037	0.269	1.50689e-15	3	14.8219	ENST00000296412	ADH5
3.34593e-20	-0.622244	0.057	0.306	1.72821e-15	3	14.7624	ENST00000361479	MPHOSPH8
3.50743e-20	-0.304247	0.179	0.522	1.81162e-15	3	14.7419	ENST00000620766	LINC00926
4.042e-20	0.274633	0.915	0.79	2.08773e-15	2	14.6803	ENST00000229239	GAPDH
4.59382e-20	-0.77103	0.037	0.268	2.37276e-15	3	14.6247	ENST00000457167	DNAJC7
6.30403e-20	-0.925215	0.169	0.256	3.2561e-15	1	14.4873	ENST00000340635	PDE4D
7.49268e-20	-0.763143	0.057	0.302	3.87004e-15	3	14.4123	ENST00000465139	ANP32A
7.95821e-20	-0.574215	0.43	0.519	4.1105e-15	0	14.3861	ENST00000463255
8.09313e-20	1.98419	0.534	0.488	4.18018e-15	3	14.3788	ENST00000463255
1.07727e-19	0.296589	0.827	0.693	5.56419e-15	2	14.2546	ENST00000374843	HLA-DMA
1.1693e-19	-0.826016	0.074	0.329	6.03954e-15	3	14.219	ENST00000358204	TES
1.33129e-19	-0.905267	0.051	0.29	6.87626e-15	3	14.1626	ENST00000369014	ENSA
1.49712e-19	0.697687	0.259	0.158	7.73276e-15	2	14.1117	ENST00000476717	EGLN1
1.56268e-19	-0.43535	0.094	0.365	8.0714e-15	3	14.0931	ENST00000209875	CBX5
2.15983e-19	0.418983	0.506	0.373	1.11557e-14	2	13.9525	ENST00000303221	EMB
2.27064e-19	-1.13477	0.04	0.265	1.17281e-14	3	13.9308	ENST00000359856	ARPC5
2.50008e-19	0.589808	0.345	0.224	1.29132e-14	2	13.889	ENST00000242607	HVCN1
3.23682e-19	-0.849961	0.215	0.305	1.67185e-14	0	13.7768	ENST00000647309	RIPOR2
3.35314e-19	-0.322069	0.082	0.344	1.73193e-14	3	13.7615	ENST00000220003	CSK
3.93848e-19	0.506178	0.41	0.279	2.03427e-14	2	13.6916	ENST00000530028	EID1
5.12282e-19	2.25116	0.452	0.347	2.64599e-14	3	13.5774	ENST00000672204	AFF3
5.26337e-19	-0.679937	0.074	0.325	2.71858e-14	3	13.5657	ENST00000345317	SKAP2
5.31834e-19	-0.570951	0.102	0.374	2.74698e-14	3	13.5611	ENST00000313368	TAF7
6.75126e-19	0.318282	0.7	0.63	3.48709e-14	0	13.4575	ENST00000475947	SNHG29
8.20398e-19	2.16442	0.506	0.442	4.23744e-14	3	13.3729	ENST00000511245	MARCHF1
8.31081e-19	0.357483	0.463	0.335	4.29262e-14	2	13.3673	ENST00000637532	ARID1B
9.8183e-19	-0.57342	0.065	0.306	5.07125e-14	3	13.2949	ENST00000336273	MTDH
1.24893e-18	-0.912741	0.04	0.259	6.45086e-14	3	13.1904	ENST00000297151	SLU7
1.4436e-18	-1.43501	0.037	0.254	7.45633e-14	3	13.1275	ENST00000396062	FKBP3
1.54107e-18	-0.660458	0.239	0.332	7.95976e-14	0	13.0991	ENST00000646039	CDK13
1.57887e-18	0.300781	0.819	0.692	8.15504e-14	2	13.0886	ENST00000654795	SNHG5
1.58411e-18	-0.631618	0.099	0.36	8.1821e-14	3	13.0871	ENST00000422622	SSPN
1.69738e-18	0.421232	0.5	0.363	8.76716e-14	2	13.0571	ENST00000409753	JPT1
1.83025e-18	0.974832	0.313	0.138	9.45341e-14	4	13.0244	ENST00000390241	IGKJ2
1.97495e-18	0.691728	0.835	0.648	1.02008e-13	5	12.9914	ENST00000311507	PLAC8
2.15974e-18	-1.14209	0.051	0.278	1.11553e-13	3	12.9525	ENST00000266659	GLIPR1
2.3656e-18	0.470563	0.298	0.186	1.22186e-13	2	12.913	ENST00000592052	TMEM259
2.42451e-18	1.59347	0.616	0.644	1.25229e-13	3	12.9023	ENST00000443035	DENND4A
2.48457e-18	0.648437	0.755	0.537	1.2833e-13	4	12.8917	ENST00000368719	S100A6
2.48857e-18	0.296391	0.3	0.188	1.28537e-13	2	12.891	ENST00000522220	PDE7A
2.58255e-18	0.437326	0.324	0.21	1.33391e-13	2	12.8749	ENST00000409220	ARHGAP25
2.93711e-18	2.40822	0.375	0.249	1.51705e-13	3	12.819	ENST00000359570	INPP5D
3.73399e-18	0.405282	0.393	0.27	1.92864e-13	2	12.7147	ENST00000366812	ACBD3
4.30734e-18	-0.611366	0.08	0.326	2.22478e-13	3	12.6527	ENST00000371317	MCTS1
5.22109e-18	-0.396178	0.752	0.77	2.69675e-13	2	12.5692	ENST00000613788	CD48
5.45366e-18	-1.14718	0.04	0.254	2.81687e-13	3	12.5502	ENST00000409600	BZW1
6.12871e-18	1.96782	0.506	0.446	3.16554e-13	3	12.4996	ENST00000464827	ST6GAL1
6.33577e-18	-0.369265	0.58	0.654	3.27249e-13	0	12.4851	ENST00000574081	SCIMP
8.16523e-18	-0.600045	0.326	0.419	4.21743e-13	0	12.375	ENST00000238738	RHOQ
8.21109e-18	-3.70753	0.077	0.292	4.24111e-13	3	12.3725	ENST00000496168	IGKV1-5
8.9047e-18	0.343117	0.745	0.622	4.59936e-13	2	12.3373	ENST00000355857	DBI
9.98342e-18	-0.729582	0.071	0.307	5.15654e-13	3	12.2876	ENST00000393599	CDKN2D
1.16942e-17	0.444372	0.32	0.208	6.04015e-13	2	12.219	ENST00000320220	ZDHHC20
1.19142e-17	0.388687	0.37	0.177	6.15382e-13	5	12.2109	ENST00000390309	IGLV3-19
1.28742e-17	0.40531	0.401	0.282	6.64966e-13	2	12.1772	ENST00000432306	VTI1A
1.30988e-17	-0.67258	0.216	0.306	6.76564e-13	0	12.1697	ENST00000254480	SMARCC1
1.41775e-17	0.337056	0.614	0.476	7.32284e-13	2	12.1353	ENST00000271638	S100A11
1.43164e-17	1.31781	0.648	0.746	7.39457e-13	3	12.1311	ENST00000339875	MARCHF1
1.63882e-17	-0.468095	0.42	0.51	8.46468e-13	0	12.0724	ENST00000429124	FTX
2.23202e-17	0.446727	0.383	0.264	1.15286e-12	2	11.9382	ENST00000496168	IGKV1-5
2.78109e-17	-1.07774	0.163	0.265	1.43646e-12	2	11.8427	ENST00000295958	SMIM14
2.91061e-17	-0.374661	0.384	0.482	1.50336e-12	0	11.8229	ENST00000318066	UBE2N
3.46678e-17	-0.31643	0.179	0.489	1.79063e-12	3	11.747	ENST00000498020	HLA-DMB
3.74745e-17	-0.576748	0.205	0.294	1.93559e-12	0	11.7132	ENST00000373408	CCDC167
3.92786e-17	-0.635918	0.242	0.329	2.02878e-12	0	11.6928	ENST00000603037	FTX
4.31725e-17	-0.499619	0.346	0.436	2.2299e-12	0	11.6517	ENST00000538035	RIPOR2
4.38597e-17	1.68077	0.602	0.658	2.2654e-12	3	11.6449	ENST00000645517	PRKCB
5.43572e-17	2.25052	0.392	0.28	2.8076e-12	3	11.5517	ENST00000589955	BCL2
5.60209e-17	1.80253	0.494	0.423	2.89353e-12	3	11.5386	ENST00000406263	CDK14
5.66918e-17	0.44338	0.259	0.159	2.92819e-12	2	11.5334	ENST00000521786	GALNT10
6.12601e-17	-0.293206	0.998	0.993	3.16415e-12	2	11.4997	ENST00000361453	MT-ND2
7.04529e-17	0.367757	0.303	0.194	3.63896e-12	2	11.439	ENST00000290795	GPBP1L1
9.29195e-17	0.523444	0.29	0.185	4.79939e-12	2	11.3188	ENST00000273668	EAF2
1.21425e-16	-0.459721	0.333	0.425	6.27172e-12	0	11.2026	ENST00000230056	GMNN
1.62253e-16	0.363186	0.396	0.277	8.38053e-12	2	11.0767	ENST00000497571	KLF6
1.95714e-16	-1.1213	0.16	0.256	1.01088e-11	2	10.9953	ENST00000503995	ARHGAP24
1.9941e-16	-0.445025	0.604	0.68	1.02997e-11	0	10.9872	ENST00000645517	PRKCB
2.28447e-16	-0.603033	0.205	0.291	1.17995e-11	0	10.9281	ENST00000533454	UVRAG
2.28529e-16	0.404271	0.428	0.303	1.18038e-11	2	10.928	ENST00000265462	PRDX5
2.43705e-16	0.399456	0.312	0.204	1.25876e-11	2	10.9001	ENST00000555736
4.01181e-16	-0.577138	0.302	0.391	2.07214e-11	0	10.6836	ENST00000649279	SETBP1
5.03373e-16	0.433928	0.434	0.313	2.59997e-11	2	10.585	ENST00000547969	NAP1L1
6.48006e-16	0.469225	0.303	0.199	3.34702e-11	2	10.4753	ENST00000660416	LINC00342
6.48045e-16	-0.29386	0.551	0.189	3.34722e-11	11	10.4753	ENST00000390312	IGLV2-14
6.67999e-16	1.54286	0.588	0.652	3.45028e-11	3	10.4621	ENST00000504771	TNFAIP8
9.05384e-16	0.544371	0.878	0.722	4.6764e-11	5	10.3301	ENST00000511653	COPS4
9.43336e-16	-0.31591	0.697	0.763	4.87242e-11	0	10.3123	ENST00000339875	MARCHF1
9.84225e-16	-0.478741	0.408	0.495	5.08362e-11	0	10.2938	ENST00000279873	ARID5B
1.03651e-15	0.361143	0.345	0.231	5.35366e-11	2	10.2713	ENST00000553754
1.04774e-15	0.356219	0.485	0.357	5.41166e-11	2	10.2667	ENST00000409921	CAPG
1.13458e-15	0.307308	0.574	0.45	5.86024e-11	2	10.2321	ENST00000579003	MIR142HG
1.1731e-15	2.48578	0.349	0.233	6.05918e-11	3	10.2176	ENST00000544715	ETV6
1.27996e-15	-0.857831	0.074	0.29	6.6111e-11	3	10.1797	ENST00000340855	IDS
1.54708e-15	2.59845	0.304	0.18	7.99081e-11	3	10.0974	ENST00000622875
1.5573e-15	2.25839	0.438	0.359	8.04359e-11	3	10.0946	ENST00000649279	SETBP1
1.61208e-15	1.36754	0.301	0.106	8.32657e-11	7	10.0795	ENST00000371497	TSHZ2
1.74004e-15	-0.4746	0.242	0.33	8.98749e-11	0	10.0464	ENST00000472053
2.35713e-15	0.479768	0.276	0.182	1.21748e-10	2	9.91454	ENST00000394518	AKAP13
2.3681e-15	0.460225	0.315	0.122	1.22315e-10	6	9.91252	ENST00000390305	IGLV3-25
2.38806e-15	-0.848762	0.057	0.257	1.23345e-10	3	9.90888	ENST00000298428	SEC61A2
2.59836e-15	-0.278552	0.999	0.999	1.34208e-10	2	9.87222	ENST00000361789	MT-CYB
2.96188e-15	-0.685257	0.192	0.272	1.52984e-10	0	9.81535	ENST00000389793	LYST
3.65332e-15	-0.723809	0.06	0.263	1.88698e-10	3	9.72423	ENST00000225792	DDX5
3.84474e-15	-0.607693	0.065	0.272	1.98585e-10	3	9.70205	ENST00000171757	P2RY10
3.86056e-15	1.84393	0.463	0.404	1.99402e-10	3	9.70027	ENST00000538035	RIPOR2
4.13658e-15	0.548446	0.316	0.237	2.13658e-10	1	9.67028	ENST00000248948	VPREB3
5.36351e-15	1.93432	0.446	0.374	2.77031e-10	3	9.55747	ENST00000325239	WDFY4
7.31184e-15	-0.623433	0.28	0.354	3.77664e-10	1	9.42289	ENST00000475724	LYPLAL1
7.9898e-15	-0.587881	0.301	0.381	4.12681e-10	0	9.38439	ENST00000637532	ARID1B
8.72245e-15	1.76179	0.503	0.48	4.50523e-10	3	9.34628	ENST00000429124	FTX
8.73442e-15	0.488661	0.277	0.18	4.51141e-10	2	9.34569	ENST00000394295	ANXA4
9.96364e-15	-0.554189	0.062	0.262	5.14632e-10	3	9.2885	ENST00000371953	PTEN
1.01051e-14	0.328057	0.275	0.176	5.21936e-10	2	9.28238	ENST00000627864	MECP2
1.10582e-14	1.79958	0.52	0.519	5.71168e-10	3	9.24324	ENST00000409418	FCHSD2
1.13351e-14	0.33985	0.31	0.207	5.8547e-10	2	9.23249	ENST00000558983	MEF2A
1.21073e-14	0.721932	0.413	0.221	6.25354e-10	4	9.20387	ENST00000663591
1.24629e-14	0.407253	0.279	0.182	6.43723e-10	2	9.1913	ENST00000657589	GMDS-DT
1.38793e-14	-0.394701	0.074	0.282	7.1688e-10	3	9.14455	ENST00000323563	MRPS31
1.48966e-14	1.98618	0.303	0.087	7.69426e-10	10	9.11383	ENST00000390298	IGLV7-43
1.49424e-14	-0.724919	0.06	0.256	7.71791e-10	3	9.1125	ENST00000369709	RAP1A
1.52417e-14	-0.675627	0.06	0.254	7.87249e-10	3	9.10389	ENST00000266079	PRPF6
1.54601e-14	-0.308555	0.088	0.305	7.98532e-10	3	9.09771	ENST00000205636	CMTM6
1.70623e-14	-0.511844	0.317	0.4	8.81284e-10	0	9.05488	ENST00000487145	CDK14
1.76725e-14	0.476145	0.295	0.198	9.128e-10	2	9.03962	ENST00000310864	IQCB1
1.84611e-14	-0.569696	0.091	0.308	9.53534e-10	3	9.02066	ENST00000272163	LBR
1.85488e-14	0.393211	0.44	0.326	9.58062e-10	2	9.01861	ENST00000374202	IL2RG
2.14951e-14	-0.74866	0.237	0.312	1.11024e-09	1	8.95458	ENST00000503258	PDE4D
2.25198e-14	0.251646	0.416	0.299	1.16317e-09	2	8.93436	ENST00000399503	MAP3K1
2.58048e-14	2.24424	0.384	0.287	1.33284e-09	3	8.87522	ENST00000442267	TBC1D9
2.93446e-14	-0.405082	0.29	0.377	1.51568e-09	0	8.81939	ENST00000422622	SSPN
3.40051e-14	0.42262	0.336	0.232	1.7564e-09	2	8.75538	ENST00000298428	SEC61A2
4.63802e-14	0.399078	0.994	0.979	2.39558e-09	7	8.62059	ENST00000233143	TMSB10
4.65014e-14	0.395167	0.394	0.281	2.40184e-09	2	8.61946	ENST00000216181	MYH9
5.13213e-14	-0.573582	0.074	0.274	2.6508e-09	3	8.57662	ENST00000398117	BCL2
5.14871e-14	-0.276238	0.883	0.859	2.65936e-09	2	8.57522	ENST00000602554
6.82639e-14	-1.38939	0.104	0.292	3.5259e-09	5	8.45273	ENST00000498435	IGKV1-27
6.93773e-14	-0.264228	0.085	0.294	3.58341e-09	3	8.4457	ENST00000353411	SKP1
7.01632e-14	0.366053	0.292	0.194	3.624e-09	2	8.44081	ENST00000493793	EPS15
7.53911e-14	-0.33867	0.686	0.738	3.89403e-09	0	8.4096	ENST00000378024	AHNAK
8.60515e-14	1.99656	0.426	0.352	4.44465e-09	3	8.35216	ENST00000637532	ARID1B
8.71195e-14	0.399632	0.285	0.191	4.49981e-09	2	8.34681	ENST00000261483	MAN2A1
9.00197e-14	0.285598	0.318	0.218	4.64961e-09	2	8.33258	ENST00000265742	ANKIB1
9.66225e-14	0.361982	0.291	0.193	4.99065e-09	2	8.30184	ENST00000278612	NPAT
9.84946e-14	2.97227	0.25	0.14	5.08734e-09	3	8.29351	ENST00000342992	TTN
1.24545e-13	-0.602864	0.071	0.265	6.43287e-09	3	8.1916	ENST00000394071	MIDEAS
1.25829e-13	0.290502	0.599	0.475	6.4992e-09	2	8.18714	ENST00000370873	PSMA7
1.30608e-13	0.264973	0.599	0.48	6.74604e-09	2	8.17095	ENST00000504403	BANK1
1.33736e-13	-0.527766	0.074	0.272	6.90762e-09	3	8.16067	ENST00000361272	CNOT7
1.49444e-13	-0.56565	0.277	0.356	7.71894e-09	0	8.11244	ENST00000629847	MEF2C
1.51008e-13	0.364921	0.449	0.337	7.79973e-09	2	8.10792	ENST00000380635	TMSB4X
1.74972e-13	0.408494	0.283	0.188	9.03746e-09	2	8.04395	ENST00000591601
1.90164e-13	0.363457	1	0.969	9.82217e-09	7	8.00779	ENST00000451311	TMSB4X
2.49613e-13	0.447733	0.268	0.179	1.28928e-08	2	7.88965	ENST00000547540	OSBPL8
2.53548e-13	-0.471504	0.19	0.265	1.3096e-08	0	7.88286	ENST00000634222	CPNE5
2.6514e-13	0.253971	0.612	0.489	1.36948e-08	2	7.86345	ENST00000368130	AIM2
3.06789e-13	-0.431952	0.706	0.715	1.58459e-08	2	7.80008	ENST00000392795	CD79B
3.6591e-13	-2.60155	0.113	0.29	1.88996e-08	5	7.72355	ENST00000390247	IGKV3-7
3.7074e-13	0.345953	0.425	0.315	1.91491e-08	2	7.71785	ENST00000224237	VIM
4.343e-13	0.264647	0.688	0.574	2.2432e-08	2	7.64913	ENST00000477812	ACTB
4.62092e-13	0.423911	0.388	0.285	2.38675e-08	2	7.62219	ENST00000301071	TUBA1A
8.42239e-13	0.961164	0.315	0.167	4.35025e-08	5	7.36149	ENST00000380490	ALOX5AP
8.75158e-13	0.420641	0.337	0.238	4.52028e-08	2	7.34483	ENST00000409393	CRIP1
9.27162e-13	-0.457918	0.249	0.326	4.78888e-08	0	7.31977	ENST00000432306	VTI1A
1.03435e-12	1.43407	0.289	0.11	5.34254e-08	7	7.27225	ENST00000556614	HOPX
1.08246e-12	-0.508103	0.242	0.319	5.59104e-08	0	7.25251	ENST00000428670	ATP2B1
1.3155e-12	0.260708	0.694	0.568	6.7947e-08	2	7.16783	ENST00000376327	PLP2
1.32381e-12	2.20582	0.386	0.304	6.83763e-08	3	7.16509	ENST00000522582
1.35093e-12	1.05956	0.434	0.21	6.97769e-08	7	7.15629	ENST00000330540	CD86
1.49556e-12	0.380622	0.267	0.179	7.72473e-08	2	7.11212	ENST00000557785	MEF2A
1.78718e-12	0.705299	0.472	0.29	9.23098e-08	4	7.03475	ENST00000543780
1.82537e-12	0.301999	0.55	0.432	9.42824e-08	2	7.02557	ENST00000282032	ARL14EP
2.01242e-12	2.62903	0.253	0.148	1.03943e-07	3	6.9832	ENST00000531807	RRAS2
2.43552e-12	0.555042	0.27	0.184	1.25797e-07	2	6.90033	ENST00000495029	TMEM156
2.99757e-12	-0.510253	0.462	0.533	1.54827e-07	2	6.81015	ENST00000399817	IFITM2
3.00103e-12	0.295104	0.376	0.271	1.55006e-07	2	6.80965	ENST00000506419	CDC42SE2
3.17508e-12	0.348977	0.447	0.344	1.63996e-07	2	6.78517	ENST00000555558	IFI27L2
4.00018e-12	0.514315	0.252	0.17	2.06613e-07	2	6.68484	ENST00000506510	PDE4D
4.32758e-12	-5.08708	0.075	0.29	2.23524e-07	6	6.65068	ENST00000498435	IGKV1-27
4.43315e-12	0.326096	0.427	0.317	2.28977e-07	2	6.64021	ENST00000304385	TMEM154
4.44893e-12	1.99656	0.426	0.371	2.29792e-07	3	6.63867	ENST00000428648	VOPP1
4.50657e-12	-0.576911	0.077	0.256	2.32769e-07	3	6.63308	ENST00000295958	SMIM14
5.38212e-12	0.442732	0.296	0.228	2.77992e-07	1	6.55597	ENST00000295958	SMIM14
5.45343e-12	0.399136	0.396	0.293	2.81675e-07	2	6.55025	ENST00000271324	CD53
5.6504e-12	-2.80043	0.236	0.573	2.91849e-07	11	6.53484	ENST00000390237	IGKC
5.88477e-12	0.385389	0.254	0.171	3.03954e-07	2	6.51719	ENST00000264235	GSK3B
6.23836e-12	-0.849421	0.196	0.277	3.22217e-07	2	6.49185	ENST00000648748	FOXP1
6.33258e-12	0.36404	0.339	0.241	3.27084e-07	2	6.48534	ENST00000562929	COX4I1
6.60275e-12	-0.290048	1	0.999	3.41038e-07	2	6.4672	ENST00000361899	MT-ATP6
6.80045e-12	1.992	0.418	0.358	3.5125e-07	3	6.45438	ENST00000302217
6.82918e-12	-0.410734	0.422	0.498	3.52734e-07	0	6.45255	ENST00000544440	MYCBP2
7.04136e-12	0.979201	0.633	0.398	3.63693e-07	7	6.43926	ENST00000368811	S100A10
8.16986e-12	-6.35691	0.054	0.288	4.21981e-07	7	6.37471	ENST00000390247	IGKV3-7
9.03068e-12	2.64535	0.273	0.173	4.66443e-07	3	6.3312	ENST00000266022	RBM6
9.53931e-12	0.255854	0.59	0.468	4.92715e-07	2	6.3074	ENST00000367075	EZR
1.01151e-11	-0.487853	0.393	0.469	5.22454e-07	0	6.28195	ENST00000511245	MARCHF1
1.06896e-11	0.281282	0.216	0.501	5.52128e-07	3	6.25796	ENST00000393067	POU2AF1
1.33004e-11	0.355779	0.312	0.219	6.86978e-07	2	6.16306	ENST00000618691	NAP1L1
1.39052e-11	0.36529	0.315	0.222	7.1822e-07	2	6.14374	ENST00000547704	NAP1L1
1.56033e-11	-0.479947	0.457	0.517	8.05927e-07	1	6.0937	ENST00000372195	RAPGEF1
1.57253e-11	-0.333376	0.45	0.523	8.12229e-07	0	6.09032	ENST00000504403	BANK1
2.00636e-11	0.350688	0.267	0.182	1.03631e-06	2	5.98451	ENST00000304434	ELOVL5
2.16869e-11	0.30614	0.36	0.256	1.12015e-06	2	5.95072	ENST00000337682	SINHCAF
2.34537e-11	-0.392246	0.511	0.578	1.21141e-06	1	5.91671	ENST00000356136	UVRAG
2.43036e-11	-3.505	0.135	0.289	1.2553e-06	5	5.90125	ENST00000496168	IGKV1-5
2.71449e-11	-3.54665	0.08	0.288	1.40206e-06	6	5.85323	ENST00000390247	IGKV3-7
2.84101e-11	0.447078	0.272	0.188	1.46741e-06	2	5.83345	ENST00000482684	CUTA
3.08297e-11	-4.61029	0.146	0.483	1.59239e-06	11	5.79795	ENST00000390239	IGKJ4
3.26677e-11	0.349456	0.291	0.206	1.68732e-06	2	5.7728	ENST00000371205	ENTPD1
3.44255e-11	1.55621	0.526	0.559	1.77811e-06	3	5.75004	ENST00000356136	UVRAG
4.56829e-11	0.287283	0.566	0.502	2.35957e-06	1	5.62717	ENST00000399817	IFITM2
4.7603e-11	-1.40914	0.235	0.399	2.45874e-06	5	5.60929	ENST00000507116	PDE4D
5.12856e-11	-0.272913	0.561	0.629	2.64895e-06	0	5.57693	ENST00000337147	EZR
5.66283e-11	0.70013	0.693	0.446	2.92491e-06	7	5.53389	ENST00000318066	UBE2N
5.91778e-11	0.304194	0.487	0.377	3.05659e-06	2	5.51476	ENST00000434651	HLA-DQB1
6.40985e-11	0.294975	0.52	0.408	3.31075e-06	2	5.48007	ENST00000229238	MRPL51
6.92259e-11	2.05936	0.321	0.234	3.57559e-06	3	5.44665	ENST00000439701	IKZF1
7.39547e-11	0.259004	0.285	0.197	3.81984e-06	2	5.41796	ENST00000261427	UBE2K
7.76467e-11	2.0907	0.355	0.28	4.01053e-06	3	5.3968	ENST00000571289	PAFAH1B1
8.0657e-11	-2.71977	0.188	0.478	4.16602e-06	8	5.38028	ENST00000390323	IGLC2
8.2283e-11	2.47066	0.264	0.17	4.25e-06	3	5.37161	ENST00000436577	CDK14
8.39439e-11	-0.400299	0.359	0.435	4.33579e-06	0	5.36293	ENST00000489243	KDM4C
9.38592e-11	0.360717	0.255	0.175	4.84792e-06	2	5.31444	ENST00000373845	CNTRL
9.72976e-11	0.333927	0.378	0.281	5.02552e-06	2	5.29882	ENST00000600974
9.89068e-11	1.98096	0.378	0.314	5.10864e-06	3	5.29169	ENST00000493459	MBNL1
1.02513e-10	-0.464081	0.321	0.389	5.2949e-06	0	5.27614	ENST00000621077
1.13314e-10	0.467247	0.266	0.183	5.85278e-06	2	5.23264	ENST00000265404	STAP1
1.15254e-10	-0.294128	0.793	0.84	5.95301e-06	1	5.22526	ENST00000508653	BANK1
1.15416e-10	-0.3307	0.651	0.717	5.96133e-06	0	5.22466	ENST00000505091
1.2568e-10	-0.787168	0.298	0.472	6.49151e-06	4	5.18765	ENST00000443565	LINC01781
1.4219e-10	-4.17823	0.197	0.457	7.34424e-06	8	5.13405	ENST00000390325	IGLC3
1.45628e-10	-0.548464	0.208	0.274	7.52186e-06	0	5.12367	ENST00000409112	SP100
1.67965e-10	-0.58257	0.239	0.304	8.67558e-06	0	5.0617	ENST00000571289	PAFAH1B1
1.68137e-10	2.12369	0.281	0.186	8.68442e-06	3	5.06126	ENST00000657332
1.72067e-10	0.287705	0.327	0.234	8.88745e-06	2	5.05122	ENST00000259006	LIMD2
1.80303e-10	0.367094	0.308	0.219	9.31283e-06	2	5.03092	ENST00000272638	UBXN4
1.80306e-10	0.845941	0.536	0.299	9.31298e-06	7	5.03091	ENST00000538142	SSPN
2.05071e-10	0.369319	0.306	0.218	1.05921e-05	2	4.97502	ENST00000380739	SERPINB1
2.09996e-10	-0.44304	0.312	0.384	1.08465e-05	0	4.96471	ENST00000302217
2.13249e-10	0.291112	0.436	0.334	1.10145e-05	2	4.95803	ENST00000264192	CYTIP
2.20956e-10	-0.396657	0.634	0.656	1.14126e-05	2	4.94262	ENST00000475947	SNHG29
2.31112e-10	-0.534437	0.204	0.27	1.19372e-05	0	4.9231	ENST00000553754
2.61074e-10	2.14326	0.355	0.278	1.34847e-05	3	4.87016	ENST00000505856	ARHGAP24
2.61715e-10	0.897279	0.717	0.494	1.35179e-05	7	4.86909	ENST00000271638	S100A11
2.72834e-10	-2.79068	0.06	0.288	1.40921e-05	7	4.85102	ENST00000496168	IGKV1-5
3.00777e-10	0.333398	0.287	0.207	1.55354e-05	2	4.80868	ENST00000494260	ARID1B
3.6227e-10	-0.431989	0.186	0.251	1.87116e-05	0	4.72789	ENST00000461422	CFLAR
3.777e-10	-0.439275	0.48	0.54	1.95086e-05	0	4.70977	ENST00000313708	EBF1
3.87197e-10	2.32404	0.307	0.224	1.99991e-05	3	4.69899	ENST00000521561	TPD52
3.87682e-10	0.326388	0.357	0.266	2.00242e-05	2	4.69845	ENST00000340855	IDS
4.15542e-10	0.420975	0.302	0.218	2.14631e-05	2	4.66831	ENST00000255688	PLAAT4
4.35307e-10	-0.435665	0.281	0.352	2.24841e-05	0	4.64813	ENST00000369577	ZNF292
4.6448e-10	-0.465379	0.641	0.676	2.39908e-05	2	4.61995	ENST00000415888	RALGPS2
4.75098e-10	0.880314	0.524	0.297	2.45393e-05	7	4.61014	ENST00000472053
4.87421e-10	-2.71072	0.259	0.457	2.51758e-05	7	4.59902	ENST00000390325	IGLC3
4.97263e-10	0.324414	0.308	0.221	2.56841e-05	2	4.59034	ENST00000513458	SREK1IP1
5.00335e-10	-0.462013	0.274	0.34	2.58428e-05	0	4.58766	ENST00000616070	HSH2D
5.16554e-10	-0.318845	0.733	0.783	2.66806e-05	0	4.57381	ENST00000367364	PTPRC
5.34811e-10	1.84107	0.392	0.336	2.76235e-05	3	4.55872	ENST00000536562	DENND5B
5.65099e-10	0.319105	0.26	0.18	2.91879e-05	2	4.5348	ENST00000313349	SERTAD2
5.65814e-10	0.314274	0.355	0.267	2.92249e-05	2	4.53425	ENST00000261313	PEBP1
6.10515e-10	1.2634	0.296	0.108	3.15337e-05	9	4.50122	ENST00000662178	OSTN-AS1
6.27536e-10	0.292723	0.559	0.468	3.24129e-05	2	4.48928	ENST00000314583	HCLS1
6.43452e-10	-3.78	0.078	0.289	3.32349e-05	7	4.47841	ENST00000498435	IGKV1-27
6.74881e-10	0.284852	1	0.973	3.48583e-05	7	4.45769	ENST00000374213	CD52
7.14884e-10	0.636837	0.108	0.289	3.69245e-05	3	4.43269	ENST00000216727	PABPN1
7.63715e-10	-0.678659	0.271	0.351	3.94467e-05	2	4.40399	ENST00000536562	DENND5B
7.7889e-10	0.279709	0.617	0.554	4.02304e-05	1	4.39545	ENST00000616316	IFITM2
7.83083e-10	-0.330562	0.358	0.429	4.0447e-05	0	4.39311	ENST00000406337	KAT6A
7.94209e-10	0.898939	0.385	0.243	4.10217e-05	5	4.38699	ENST00000295958	SMIM14
8.34951e-10	2.25943	0.284	0.2	4.31261e-05	3	4.36526	ENST00000371998	NCOA3
8.66003e-10	-3.75564	0.1	0.288	4.47299e-05	6	4.3494	ENST00000496168	IGKV1-5
8.93817e-10	2.23753	0.301	0.216	4.61665e-05	3	4.33567	ENST00000494260	ARID1B
9.27275e-10	-1.5559	0.147	0.295	4.78947e-05	5	4.31971	ENST00000503258	PDE4D
9.28423e-10	-0.62857	0.219	0.277	4.7954e-05	1	4.31918	ENST00000612282
9.78057e-10	-0.560263	0.324	0.39	5.05176e-05	2	4.29656	ENST00000534668	MS4A1
9.79949e-10	-0.817001	0.219	0.293	5.06153e-05	2	4.29572	ENST00000505856	ARHGAP24
1.00978e-09	-0.351393	0.435	0.512	5.21559e-05	0	4.2827	ENST00000651074
1.05292e-09	0.302487	0.261	0.185	5.43843e-05	2	4.26453	ENST00000565617	ZNNT1
1.07254e-09	-0.364497	0.647	0.69	5.53979e-05	1	4.25651	ENST00000549727	ATP2B1
1.10402e-09	0.75005	0.602	0.372	5.7024e-05	7	4.24394	ENST00000237858	GLRX
1.17079e-09	-2.81597	0.213	0.477	6.04725e-05	9	4.21844	ENST00000390323	IGLC2
1.18743e-09	0.409837	0.099	0.274	6.13321e-05	3	4.21231	ENST00000336133	SARNP
1.39044e-09	-0.448927	0.445	0.51	7.18178e-05	1	4.14377	ENST00000463255
1.39967e-09	-0.383638	0.532	0.581	7.22945e-05	2	4.14089	ENST00000616316	IFITM2
1.48143e-09	2.26183	0.312	0.235	7.65174e-05	3	4.11624	ENST00000521482
1.57288e-09	0.541543	0.555	0.397	8.12408e-05	4	4.09023	ENST00000368811	S100A10
1.59319e-09	0.424137	0.499	0.339	8.229e-05	4	4.08465	ENST00000511382	PDE4D
1.75588e-09	-0.42998	0.207	0.267	9.06928e-05	0	4.04243	ENST00000650983	SELL
1.76649e-09	0.45369	0.357	0.27	9.12409e-05	2	4.03981	ENST00000498435	IGKV1-27
2.03816e-09	2.26985	0.315	0.241	0.000105273	3	3.97768	ENST00000642180	BCL11A
2.05092e-09	0.26326	0.266	0.189	0.000105932	2	3.97497	ENST00000484165	ACTR3
2.08143e-09	-0.574786	0.214	0.274	0.000107508	0	3.96856	ENST00000359570	INPP5D
2.1179e-09	0.328613	0.308	0.224	0.000109391	2	3.96102	ENST00000382159	GNG7
2.36739e-09	-0.619266	0.494	0.534	0.000122278	2	3.91265	ENST00000477383
2.71308e-09	-0.626087	0.226	0.282	0.000140133	1	3.85346	ENST00000518486	FBXL17
3.00602e-09	-0.605635	0.198	0.256	0.000155264	0	3.80893	ENST00000257915	TFCP2
3.22776e-09	1.66295	0.343	0.143	0.000166717	9	3.77802	ENST00000390241	IGKJ2
3.4173e-09	0.269922	0.28	0.198	0.000176507	2	3.75324	ENST00000296953	CREBRF
3.58892e-09	-0.571156	0.29	0.348	0.000185371	1	3.73196	ENST00000629847	MEF2C
4.92106e-09	-0.339641	0.295	0.362	0.000254178	0	3.59486	ENST00000260641	ACTR2
5.07232e-09	0.371955	0.356	0.272	0.00026199	2	3.58171	ENST00000379847	NDUFB6
5.8336e-09	-0.486924	0.359	0.424	0.000301311	2	3.52098	ENST00000337002	SEC62
6.03849e-09	0.376858	0.318	0.234	0.000311894	2	3.50599	ENST00000369709	RAP1A
6.19801e-09	-2.22587	0.194	0.457	0.000320133	9	3.49467	ENST00000390325	IGLC3
6.31856e-09	-0.476934	0.275	0.336	0.00032636	0	3.4863	ENST00000493459	MBNL1
7.12502e-09	0.755643	0.431	0.296	0.000368015	5	3.43413	ENST00000328649	CIB1
7.19267e-09	0.292096	0.264	0.19	0.000371509	2	3.43003	ENST00000505900	ZNF721
7.25803e-09	-0.498782	0.26	0.322	0.000374885	0	3.4261	ENST00000472310	MCUB
7.65415e-09	2.23518	0.293	0.217	0.000395345	3	3.40302	ENST00000444263	LINC00278
8.68831e-09	-0.419334	0.265	0.331	0.00044876	0	3.34799	ENST00000267068	N4BP2L2
1.04802e-08	1.98889	0.364	0.316	0.000541315	3	3.26655	ENST00000399503	MAP3K1
1.07279e-08	-0.506366	0.241	0.301	0.000554106	1	3.25641	ENST00000571289	PAFAH1B1
1.12298e-08	0.2624	0.258	0.185	0.000580031	2	3.23655	ENST00000451407	INPP5D
1.19071e-08	-0.564413	0.374	0.429	0.000615016	2	3.21111	ENST00000423313	KIAA0040
1.22626e-08	0.27216	0.378	0.296	0.000633374	2	3.19834	ENST00000486152	ZBTB20
1.27564e-08	1.23858	0.539	0.295	0.000658881	11	3.18119	ENST00000543780
1.39462e-08	0.882228	0.287	0.169	0.000720335	5	3.14247	ENST00000390549	IGHG1
1.42998e-08	-0.49519	0.276	0.338	0.000738601	0	3.13159	ENST00000399503	MAP3K1
1.45757e-08	0.271892	0.334	0.253	0.00075285	2	3.12329	ENST00000336133	SARNP
1.4663e-08	0.712269	0.56	0.345	0.000757359	7	3.1207	ENST00000422622	SSPN
1.48891e-08	1.97772	0.364	0.315	0.000769036	3	3.11405	ENST00000485326	FOXP1
1.6119e-08	2.22288	0.295	0.224	0.000832563	3	3.07958	ENST00000352689	MKLN1
1.90209e-08	-3.20056	0.343	0.476	0.000982449	7	3.00769	ENST00000390323	IGLC2
2.07074e-08	1.9169	0.392	0.36	0.00106956	3	2.9708	ENST00000540479	CALML4
2.26518e-08	-0.493561	0.199	0.256	0.00116999	0	2.93182	ENST00000521482
2.45291e-08	0.409742	0.81	0.676	0.00126695	5	2.89724	ENST00000223641	SEC61B
2.50136e-08	0.498233	0.448	0.298	0.00129198	4	2.88875	ENST00000538142	SSPN
2.87547e-08	0.268318	0.488	0.399	0.00148521	2	2.82821	ENST00000221561	TLE5
2.88714e-08	0.276078	0.276	0.197	0.00149123	2	2.82645	ENST00000351018	RHOG
3.16003e-08	-0.256089	0.256	0.316	0.00163219	0	2.78723	ENST00000497571	KLF6
3.1775e-08	0.367264	0.165	0.363	0.00164121	3	2.78484	ENST00000369026	MCL1
4.49473e-08	-1.34208	0.13	0.253	0.00232157	4	2.63422	ENST00000295958	SMIM14
4.62589e-08	0.428726	0.295	0.246	0.00238932	0	2.62173	ENST00000304677	RNASE6
4.67892e-08	0.32583	0.291	0.215	0.00241671	2	2.61678	ENST00000265729	SRI
4.98264e-08	-0.43258	0.226	0.283	0.00257358	0	2.58946	ENST00000632133
5.06565e-08	0.287309	0.323	0.244	0.00261646	2	2.58229	ENST00000330914	TUBB
5.6335e-08	-2.27083	0.354	0.202	0.00290976	4	2.53614	ENST00000498574	IGKV1-39
5.69762e-08	0.278594	0.134	0.304	0.00294288	3	2.53123	ENST00000497571	KLF6
5.75495e-08	0.286694	0.259	0.19	0.00297249	2	2.52688	ENST00000511833	ZNF721
6.03058e-08	-0.445029	0.221	0.277	0.00311485	0	2.50656	ENST00000379096	TPD52
7.10632e-08	-0.430731	0.429	0.487	0.00367049	0	2.43528	ENST00000333681	BCL2
7.52021e-08	-0.776554	0.213	0.268	0.00388426	2	2.41069	ENST00000469754	DLEU1
8.5883e-08	1.73342	0.389	0.366	0.00443594	3	2.35301	ENST00000621077
8.67904e-08	-0.435235	0.269	0.326	0.00448281	0	2.34845	ENST00000522582
8.96146e-08	2.39124	0.256	0.185	0.00462868	3	2.33454	ENST00000409544	ZNF638
9.28024e-08	0.342277	0.165	0.356	0.00479334	3	2.31936	ENST00000327134	PAK2
9.5753e-08	0.448633	0.531	0.379	0.00494574	4	2.30577	ENST00000409753	JPT1
9.75261e-08	0.252922	0.407	0.325	0.00503732	2	2.2978	ENST00000549970	VPS29
9.89704e-08	1.06012	0.319	0.163	0.00511192	7	2.29142	ENST00000398805	HSDL2
1.03325e-07	0.33286	0.814	0.683	0.00533682	4	2.27272	ENST00000322028	POLR2L
1.07308e-07	0.283749	0.991	0.936	0.00554256	5	2.25629	ENST00000221972	CD79A
1.13069e-07	-0.413023	0.392	0.442	0.00584014	1	2.23358	ENST00000406263	CDK14
1.1436e-07	-0.51378	0.202	0.254	0.00590682	0	2.22865	ENST00000439701	IKZF1
1.16714e-07	0.70567	0.295	0.141	0.00602837	7	2.2198	ENST00000485762	PALM2AKAP2
1.16778e-07	-0.493753	0.269	0.324	0.00603169	1	2.21956	ENST00000522582
1.25375e-07	2.04327	0.298	0.23	0.00647574	3	2.18871	ENST00000257749	BACH2
1.27693e-07	0.460042	0.309	0.185	0.00659545	5	2.18076	ENST00000657332
1.3057e-07	-0.268567	0.76	0.809	0.00674405	0	2.17108	ENST00000552641	ARHGAP15
1.54424e-07	0.392064	0.139	0.31	0.00797614	3	2.09821	ENST00000617275	PLEKHA2
1.58406e-07	0.716213	0.572	0.361	0.00818183	7	2.08715	ENST00000392246	SUMO1
1.64163e-07	0.600848	0.425	0.296	0.0084792	4	2.07164	ENST00000472053
1.78367e-07	0.369531	0.311	0.258	0.00921283	1	2.03561	ENST00000555619	NPC2
1.94638e-07	2.14455	0.281	0.216	0.0100533	3	1.99769	ENST00000472022	KLF12
1.97258e-07	1.99506	0.284	0.221	0.0101886	3	1.99189	ENST00000558983	MEF2A
1.9823e-07	0.953208	0.283	0.137	0.0102388	7	1.98975	ENST00000246551	HCST
2.20923e-07	-0.370659	0.444	0.497	0.0114109	1	1.94268	ENST00000429124	FTX
2.27562e-07	0.361723	0.628	0.493	0.0117538	4	1.92982	ENST00000271638	S100A11
2.28207e-07	-0.774467	0.311	0.359	0.0117871	2	1.92859	ENST00000672204	AFF3
2.31873e-07	-0.447792	0.249	0.306	0.0119765	0	1.92167	ENST00000506419	CDC42SE2
2.32948e-07	1.91297	0.341	0.3	0.012032	3	1.91966	ENST00000646039	CDK13
2.36493e-07	0.620807	0.53	0.328	0.0122151	7	1.9131	ENST00000475724	LYPLAL1
2.39713e-07	2.20406	0.259	0.19	0.0123814	3	1.90723	ENST00000380916	ZDHHC21
2.49807e-07	1.32119	0.474	0.501	0.0129028	3	1.88932	ENST00000504403	BANK1
2.56755e-07	1.70012	0.401	0.388	0.0132617	3	1.8774	ENST00000238738	RHOQ
2.60838e-07	0.693859	0.287	0.175	0.0134726	5	1.87055	ENST00000512369	DAPP1
2.65879e-07	0.284277	0.42	0.367	0.0137329	1	1.86224	ENST00000302422	TMEM256
2.89935e-07	1.27919	0.281	0.108	0.0149754	11	1.82462	ENST00000662178	OSTN-AS1
3.10389e-07	-0.419552	0.365	0.427	0.0160319	0	1.79501	ENST00000367854	RCSD1
3.29453e-07	0.272555	0.288	0.215	0.0170166	2	1.76913	ENST00000329970	GTF3C6
3.37539e-07	0.566246	0.151	0.322	0.0174342	3	1.7586	ENST00000397885	PUM3
3.68888e-07	-0.266866	0.263	0.323	0.0190534	0	1.72003	ENST00000538142	SSPN
3.84925e-07	0.273975	0.267	0.201	0.0198817	2	1.70155	ENST00000486330	PIBF1
4.52446e-07	0.280646	0.299	0.227	0.0233693	2	1.63135	ENST00000366790	PARP1
4.61141e-07	-0.432186	0.431	0.484	0.0238184	1	1.62309	ENST00000333681	BCL2
4.96732e-07	-0.610071	0.207	0.264	0.0256567	2	1.5908	ENST00000520348	SNHG6
5.01392e-07	-0.357605	0.271	0.325	0.0258974	0	1.58674	ENST00000638232	FTX
5.06538e-07	-0.27479	0.473	0.523	0.0261632	0	1.58231	ENST00000620766	LINC00926
5.52246e-07	0.550172	0.926	0.742	0.0285241	9	1.54479	ENST00000368716	S100A4
5.70327e-07	2.03105	0.341	0.309	0.029458	3	1.5308	ENST00000267068	N4BP2L2
5.84706e-07	0.302293	0.278	0.209	0.0302007	2	1.51998	ENST00000242465	SRGN
5.89011e-07	0.484217	0.62	0.407	0.030423	7	1.5168	ENST00000648608	CD53
5.89824e-07	-0.353797	0.494	0.528	0.030465	2	1.5162	ENST00000261735	ERP29
5.95584e-07	-0.298828	0.207	0.261	0.0307625	0	1.51198	ENST00000242607	HVCN1
6.20436e-07	0.305076	0.777	0.666	0.0320461	5	1.49422	ENST00000415888	RALGPS2
6.23008e-07	1.16702	0.557	0.668	0.032179	3	1.49243	ENST00000234816	ANGPTL1
6.4441e-07	-5.01992	0.045	0.286	0.0332844	11	1.47776	ENST00000496168	IGKV1-5
6.49033e-07	0.449908	0.17	0.358	0.0335232	3	1.47465	ENST00000488618	STK4
6.59194e-07	-0.460184	0.3	0.348	0.0340481	1	1.46791	ENST00000460591	MBNL1
6.74778e-07	-0.274682	0.752	0.773	0.0348529	1	1.45776	ENST00000367364	PTPRC
6.78199e-07	-0.310491	0.485	0.536	0.0350297	0	1.45556	ENST00000409418	FCHSD2
6.84958e-07	-0.38948	0.323	0.379	0.0353788	0	1.45126	ENST00000540479	CALML4
7.89084e-07	-0.330662	0.271	0.326	0.040757	0	1.3898	ENST00000554360	PSMA3-AS1
8.00727e-07	-0.344258	0.248	0.302	0.0413583	0	1.38344	ENST00000589955	BCL2
8.73525e-07	2.16358	0.256	0.193	0.0451184	3	1.34565	ENST00000526274
8.83238e-07	0.424268	0.625	0.501	0.0456201	4	1.34084	ENST00000374517	TXN
9.38402e-07	0.499702	0.807	0.639	0.0484694	7	1.31453	ENST00000355857	DBI
9.38995e-07	0.473707	0.904	0.741	0.0485001	7	1.31426	ENST00000368716	S100A4
9.39485e-07	0.566789	0.257	0.156	0.0485254	4	1.31403	ENST00000641095	IGHG2
1.00682e-06	0.564935	0.663	0.503	0.0520034	7	1.28397	ENST00000374517	TXN
1.01244e-06	0.585166	0.286	0.177	0.0522933	4	1.28155	ENST00000463592	CNTNAP2
1.07588e-06	2.01885	0.253	0.19	0.0555701	3	1.25516	ENST00000618586
1.27832e-06	0.326643	0.285	0.241	0.0660267	0	1.18028	ENST00000520348	SNHG6
1.28057e-06	-0.336459	0.358	0.402	0.0661425	1	1.17952	ENST00000238738	RHOQ
1.2893e-06	0.598818	0.372	0.254	0.0665936	4	1.17657	ENST00000367660	ABRACL
1.36313e-06	0.353478	0.257	0.193	0.0704069	2	1.15238	ENST00000548580	MYL6
1.43206e-06	0.524586	0.723	0.542	0.0739672	7	1.13096	ENST00000368719	S100A6
1.56763e-06	0.306408	0.779	0.644	0.0809696	4	1.09168	ENST00000368097	TAGLN2
1.59302e-06	-0.322335	0.267	0.322	0.0822812	0	1.0847	ENST00000381297	P2RY8
1.61309e-06	-0.390025	0.257	0.304	0.0833177	1	1.07926	ENST00000366812	ACBD3
1.61799e-06	-0.696653	0.349	0.472	0.083571	5	1.07794	ENST00000279873	ARID5B
1.63378e-06	-0.41585	0.49	0.534	0.0843863	1	1.07373	ENST00000313708	EBF1
1.7576e-06	0.826127	0.295	0.153	0.0907817	7	1.042	ENST00000399916	RUNX3
1.75804e-06	-0.377714	0.312	0.36	0.0908047	1	1.04189	ENST00000511382	PDE4D
1.94048e-06	0.397807	0.843	0.726	0.100228	7	0.999012	ENST00000249786	SERF2
2.05256e-06	0.32813	0.829	0.717	0.106017	4	0.974625	ENST00000378024	AHNAK
2.17079e-06	-0.326325	0.215	0.265	0.112123	0	0.950304	ENST00000613507	RIPOR2
2.18209e-06	0.606397	0.333	0.226	0.112707	4	0.948048	ENST00000275036	HMGN3
2.44908e-06	0.730835	0.476	0.298	0.126498	7	0.897918	ENST00000301071	TUBA1A
2.53859e-06	1.35539	0.27	0.113	0.131121	11	0.882329	ENST00000390545	IGHG2
2.54138e-06	-0.271323	0.309	0.364	0.131265	0	0.881852	ENST00000357066	MOB3A
2.55563e-06	-0.568635	0.247	0.302	0.132001	2	0.879423	ENST00000454498	CSGALNACT1
2.64132e-06	0.364205	0.116	0.255	0.136427	3	0.8651	ENST00000259006	LIMD2
2.97431e-06	-0.360372	0.285	0.336	0.153626	0	0.813535	ENST00000421035	UTRN
3.09869e-06	-0.350295	0.256	0.306	0.160051	0	0.795743	ENST00000371727	EPS15
3.40452e-06	0.387042	0.734	0.617	0.175847	5	0.754866	ENST00000247866	NDUFB2
3.43834e-06	0.384035	0.159	0.317	0.177594	3	0.750572	ENST00000390547	IGHA1
3.62733e-06	0.364621	0.261	0.495	0.187355	3	0.727334	ENST00000368985	CTSS
3.77459e-06	0.945455	0.271	0.142	0.194961	7	0.710051	ENST00000435200	EMC8
3.91782e-06	0.448194	0.873	0.731	0.202359	7	0.693877	ENST00000573283	ACTG1
3.95467e-06	-0.396611	0.311	0.364	0.204263	0	0.689811	ENST00000608190
3.96143e-06	2.14782	0.284	0.236	0.204612	3	0.68907	ENST00000257915	TFCP2
3.98275e-06	0.275061	0.418	0.373	0.205713	1	0.686739	ENST00000379542	TMEM14B
4.31436e-06	0.383449	0.873	0.766	0.222841	7	0.652004	ENST00000314675	UBXN11
4.51698e-06	-1.08336	0.229	0.336	0.233306	5	0.632074	ENST00000475724	LYPLAL1
4.65781e-06	0.479969	0.495	0.369	0.240581	5	0.618739	ENST00000376755	RBM3
4.70561e-06	0.653631	0.717	0.544	0.24305	10	0.614305	ENST00000368719	S100A6
4.98705e-06	0.433361	0.892	0.757	0.257586	7	0.589078	ENST00000595207	GMFG
5.22642e-06	0.306858	0.31	0.249	0.26995	2	0.568717	ENST00000367660	ABRACL
5.2606e-06	-0.423289	0.342	0.387	0.271715	1	0.565886	ENST00000487145	CDK14
5.52174e-06	-0.498245	0.228	0.283	0.285203	2	0.544846	ENST00000555619	NPC2
5.7353e-06	-5.27166	0.079	0.287	0.296234	11	0.528365	ENST00000498435	IGKV1-27
6.02255e-06	1.67823	0.332	0.3	0.311071	3	0.507141	ENST00000432306	VTI1A
6.03643e-06	0.410869	0.759	0.589	0.311787	7	0.506141	ENST00000477812	ACTB
6.05323e-06	2.27196	0.259	0.204	0.312655	3	0.504934	ENST00000513414	PARP8
6.07043e-06	-0.252397	0.45	0.502	0.313544	0	0.503702	ENST00000453677	KMT2E-AS1
6.90858e-06	1.82908	0.312	0.276	0.356835	3	0.447532	ENST00000254480	SMARCC1
6.91214e-06	0.780772	0.38	0.237	0.357019	7	0.447309	ENST00000270792	SH3BGRL3
7.26629e-06	-0.26669	0.643	0.673	0.375311	1	0.425609	ENST00000336755	ZCCHC7
7.47539e-06	0.315909	0.783	0.675	0.386111	5	0.413287	ENST00000256644	LAMTOR5
7.54863e-06	0.267638	0.844	0.756	0.389894	4	0.409053	ENST00000595207	GMFG
7.74796e-06	-0.275885	1	1	0.40019	5	0.397734	ENST00000362079	MT-CO3
8.04446e-06	-0.393405	0.233	0.28	0.415504	0	0.381424	ENST00000518486	FBXL17
8.29931e-06	0.271414	0.77	0.655	0.428668	4	0.367879	ENST00000537328	TMEM258
8.71761e-06	0.294194	0.318	0.253	0.450273	2	0.346524	ENST00000171757	P2RY10
9.21891e-06	-0.259245	0.361	0.41	0.476166	0	0.322242	ENST00000303221	EMB
9.33755e-06	0.508428	0.554	0.382	0.482294	7	0.316688	ENST00000409753	JPT1
9.72029e-06	0.259049	1	0.979	0.502063	10	0.299242	ENST00000233143	TMSB10
9.79145e-06	0.260545	0.273	0.214	0.505738	2	0.296074	ENST00000377384	ZNG1E
9.80493e-06	-0.344408	0.412	0.465	0.506434	0	0.295477	ENST00000464827	ST6GAL1
9.94055e-06	0.281227	0.256	0.197	0.513439	2	0.289511	ENST00000371471	ZNF217
1.00349e-05	0.662499	0.251	0.163	0.518314	4	0.285407	ENST00000398805	HSDL2
1.08169e-05	-0.342667	0.339	0.39	0.558706	0	0.252817	ENST00000428648	VOPP1
1.137e-05	-0.376579	0.247	0.291	0.587272	1	0.231161	ENST00000254480	SMARCC1
1.14238e-05	-0.265904	0.675	0.705	0.590049	1	0.229112	ENST00000505091
1.15821e-05	-0.295774	0.37	0.417	0.598225	0	0.223135	ENST00000452345	SP100
1.35744e-05	0.549815	0.185	0.351	0.70113	3	0.154202	ENST00000399788	KDM5A
1.3893e-05	-3.18278	0.079	0.285	0.717588	11	0.144125	ENST00000390247	IGKV3-7
1.41741e-05	-1.71301	0.139	0.284	0.732105	7	0.135427	ENST00000505856	ARHGAP24
1.47722e-05	0.584392	0.506	0.341	0.763	7	0.117476	ENST00000374202	IL2RG
1.55546e-05	0.404949	0.813	0.683	0.803411	7	0.0950623	ENST00000496817	S100A6
1.56434e-05	0.833335	0.404	0.262	0.807997	7	0.0925902	ENST00000373408	CCDC167
1.5878e-05	0.41824	0.675	0.487	0.820117	7	0.0861244	ENST00000272348	SNRPG
1.66983e-05	-0.350507	0.259	0.305	0.862484	0	0.0642491	ENST00000366812	ACBD3
1.67439e-05	0.313503	0.602	0.473	0.864839	4	0.063065	ENST00000524270	SPSB2
1.67753e-05	0.464184	0.56	0.377	0.86646	7	0.0622513	ENST00000467681	SSBP1
1.78268e-05	0.796191	0.398	0.221	0.920774	9	0.0358469	ENST00000602252	RPS11
1.81178e-05	-0.336123	0.498	0.536	0.935804	1	0.0288153	ENST00000643927	PRKCB
1.84048e-05	0.258061	0.268	0.213	0.950626	2	0.0219903	ENST00000367535	NCF2
1.87739e-05	-0.548457	0.245	0.289	0.969691	1	0.0133667	ENST00000647309	RIPOR2
1.88527e-05	0.562787	0.265	0.174	0.97376	4	0.0115482	ENST00000513374	TNFAIP8
1.90855e-05	0.622807	0.272	0.182	0.985784	5	0.00621844	ENST00000398606	GSTP1
0.00118101	0.439554	0.51	0.403	1	6	0	ENST00000011691	SS18L2
0.00152755	0.543996	0.373	0.261	1	7	0	ENST00000171757	P2RY10
0.000135727	0.280664	0.825	0.653	1	7	0	ENST00000184266	NDUFB4
0.00326049	0.298758	0.316	0.244	1	4	0	ENST00000194214	IFT25
0.00203734	0.514509	0.355	0.244	1	7	0	ENST00000194214	IFT25
0.00272024	0.343117	0.425	0.351	1	4	0	ENST00000215565	NDUFB7
0.00631118	0.310753	0.26	0.194	1	4	0	ENST00000215570	TIMM13
0.00401815	0.596168	0.299	0.195	1	8	0	ENST00000215570	TIMM13
0.00743228	0.45615	0.319	0.229	1	7	0	ENST00000215754	MIF
5.37199e-05	-0.25963	0.286	0.331	1	0	0	ENST00000216297	SUPT16H
0.00103671	0.27573	0.36	0.269	1	4	0	ENST00000216455	PSMA3
0.00188302	0.614396	0.427	0.271	1	11	0	ENST00000216455	PSMA3
0.000405561	0.286669	0.375	0.278	1	4	0	ENST00000216727	PABPN1
0.000250997	0.25464	0.976	0.896	1	7	0	ENST00000217652	MYL12A
0.00385428	0.30249	0.929	0.897	1	10	0	ENST00000217652	MYL12A
0.000597052	0.507064	0.313	0.174	1	10	0	ENST00000220597	PAG1
0.00133085	0.252567	0.49	0.41	1	4	0	ENST00000221561	TLE5
0.0050877	0.365289	0.518	0.411	1	7	0	ENST00000221561	TLE5
0.000456094	0.490725	0.596	0.411	1	11	0	ENST00000221561	TLE5
0.0012976	0.362444	0.33	0.251	1	4	0	ENST00000221859	POLR2I
0.000488941	0.340893	0.49	0.393	1	4	0	ENST00000223136	FIS1
0.000958996	0.289197	0.687	0.524	1	7	0	ENST00000224073	EDF1
0.00484839	0.475299	0.652	0.526	1	11	0	ENST00000224073	EDF1
3.32949e-05	0.606073	0.47	0.33	1	7	0	ENST00000224237	VIM
0.00748134	0.419377	0.31	0.227	1	6	0	ENST00000225504	SUPT4H1
0.00516837	0.587377	0.359	0.252	1	8	0	ENST00000225792	DDX5
0.0051601	0.482806	0.38	0.287	1	7	0	ENST00000226798	FRG1
0.00658929	0.501549	0.343	0.229	1	9	0	ENST00000228740	LTA4H
0.000155852	0.27393	0.891	0.807	1	4	0	ENST00000229239	GAPDH
0.00785964	-0.285469	0.379	0.402	1	1	0	ENST00000230056	GMNN
0.00160447	0.912391	0.236	0.402	1	3	0	ENST00000230056	GMNN
0.00496547	0.31373	0.494	0.393	1	7	0	ENST00000230056	GMNN
0.00168153	0.283656	0.755	0.713	1	5	0	ENST00000234313	PLEK
0.000276262	-0.677535	0.608	0.664	1	7	0	ENST00000234816	ANGPTL1
0.00127075	0.30916	0.618	0.527	1	5	0	ENST00000237654	CCNI
0.00854799	0.282723	0.645	0.539	1	7	0	ENST00000237889	NDUFB3
0.00120502	0.379258	0.401	0.319	1	5	0	ENST00000238892	CRIPT
0.000997097	0.372376	0.298	0.217	1	4	0	ENST00000242465	SRGN
0.000156279	0.278423	0.813	0.733	1	5	0	ENST00000242577	DYNLL1
0.000729322	0.311061	0.861	0.734	1	7	0	ENST00000242577	DYNLL1
0.00836178	0.627877	0.269	0.172	1	9	0	ENST00000246747	ARL2
0.000328105	0.448294	0.301	0.218	1	4	0	ENST00000247665	PHPT1
0.00856258	0.371906	0.744	0.62	1	8	0	ENST00000247866	NDUFB2
0.00300086	0.376424	0.48	0.387	1	6	0	ENST00000248451	PNKD
0.00501358	0.347778	0.657	0.546	1	7	0	ENST00000248566	SEM1
7.33742e-05	-0.987946	0.174	0.265	1	4	0	ENST00000248948	VPREB3
3.70657e-05	-0.89344	0.168	0.265	1	5	0	ENST00000248948	VPREB3
0.00300969	-1.1488	0.169	0.263	1	7	0	ENST00000248948	VPREB3
0.00214372	0.317902	0.778	0.655	1	8	0	ENST00000249071	RAC2
0.00282287	0.58944	0.385	0.265	1	8	0	ENST00000255764	MED10
0.00535779	0.419799	0.265	0.203	1	4	0	ENST00000256433	IER3IP1
0.00373357	0.25605	0.493	0.401	1	4	0	ENST00000256441	MRPS36
0.00348718	0.255039	0.536	0.402	1	7	0	ENST00000256441	MRPS36
0.00546849	0.30313	0.26	0.196	1	4	0	ENST00000256545	EMC7
0.00992836	0.379173	0.283	0.197	1	7	0	ENST00000256545	EMC7
0.000304844	-0.254069	0.691	0.677	1	2	0	ENST00000256644	LAMTOR5
0.00115287	0.333282	0.336	0.254	1	4	0	ENST00000256854	NARS1
0.000835499	0.528454	0.251	0.179	1	4	0	ENST00000257857	CD63
0.000694765	0.405917	0.257	0.179	1	5	0	ENST00000257857	CD63
0.00769609	0.312564	0.278	0.168	1	9	0	ENST00000260408	ADAM10
0.000294624	0.764306	0.193	0.347	1	3	0	ENST00000260641	ACTR2
6.3799e-05	0.482941	0.44	0.336	1	5	0	ENST00000260641	ACTR2
0.00422503	0.267563	0.357	0.28	1	4	0	ENST00000261652	TNFRSF13B
0.000193966	0.331237	0.627	0.518	1	5	0	ENST00000261735	ERP29
0.00157209	0.387919	0.336	0.257	1	5	0	ENST00000261890	RAB11A
0.00570831	0.338538	0.367	0.258	1	7	0	ENST00000261890	RAB11A
0.00864687	0.462741	0.376	0.277	1	8	0	ENST00000263253	EP300
0.00709498	0.34913	0.349	0.273	1	5	0	ENST00000263672	SPCS2
0.00705356	0.399819	0.389	0.274	1	9	0	ENST00000263672	SPCS2
0.000125984	-0.327411	0.332	0.37	1	1	0	ENST00000264170	KYNU
0.00206067	0.334285	0.431	0.347	1	4	0	ENST00000264192	CYTIP
0.00536814	0.3074	0.47	0.348	1	7	0	ENST00000264192	CYTIP
0.00321486	0.764233	0.263	0.15	1	10	0	ENST00000264202	CAPZB
0.000179101	0.774351	0.269	0.141	1	9	0	ENST00000264211	EIF4G3
4.07631e-05	-0.296172	0.305	0.349	1	0	0	ENST00000264710	RAB10
5.75494e-05	0.456445	0.251	0.161	1	5	0	ENST00000265070	GOLPH3
0.00975308	0.45572	0.419	0.322	1	8	0	ENST00000265462	PRDX5
0.00034116	0.258635	0.702	0.62	1	4	0	ENST00000267115	TMBIM6
0.000893696	0.321751	0.783	0.62	1	7	0	ENST00000267115	TMBIM6
0.00132482	0.298146	0.28	0.204	1	4	0	ENST00000267859
0.00456093	0.263485	0.566	0.447	1	7	0	ENST00000270586	PSMB6
2.80191e-05	0.633068	0.624	0.447	1	8	0	ENST00000270586	PSMB6
0.00046159	0.459592	0.428	0.307	1	7	0	ENST00000271324	CD53
0.00243094	0.495293	0.626	0.497	1	10	0	ENST00000271638	S100A11
6.65233e-05	0.591983	0.394	0.295	1	5	0	ENST00000272163	LBR
0.0011054	0.271353	0.825	0.699	1	7	0	ENST00000273258	ARL6IP5
0.00965673	0.266689	0.472	0.394	1	4	0	ENST00000276689	NDUFB9
0.00545638	0.462345	0.308	0.208	1	8	0	ENST00000278612	NPAT
0.00287617	0.253579	0.381	0.294	1	4	0	ENST00000280326	CCT5
0.000328094	0.26319	0.283	0.194	1	4	0	ENST00000281821	EPHA4
0.000328887	0.408552	0.319	0.195	1	7	0	ENST00000281821	EPHA4
0.00695351	0.288499	0.25	0.149	1	9	0	ENST00000281923	MGAT5
0.00418834	0.250877	0.398	0.317	1	4	0	ENST00000290541	PSMB4
0.00848947	0.363408	0.255	0.179	1	6	0	ENST00000293777	MED11
0.00182616	0.370525	0.65	0.49	1	8	0	ENST00000293831	EIF4A1
0.000436653	0.461068	0.295	0.181	1	7	0	ENST00000295324	CDC42EP3
0.00926906	0.310767	0.379	0.309	1	5	0	ENST00000295491	MRPS18C
0.000830132	0.326872	0.324	0.244	1	4	0	ENST00000295685	ARPC2
0.000948903	-0.5125	0.22	0.255	1	2	0	ENST00000295754	TGFBR2
0.00199057	1.64595	0.267	0.249	1	3	0	ENST00000295754	TGFBR2
0.000369452	0.571186	0.324	0.247	1	5	0	ENST00000295754	TGFBR2
0.00073697	0.340039	0.345	0.255	1	4	0	ENST00000296412	ADH5
0.00928983	0.411259	0.318	0.247	1	5	0	ENST00000297151	SLU7
0.00876421	0.324403	0.296	0.19	1	9	0	ENST00000298310	NEMF
0.000314079	0.29035	0.372	0.271	1	4	0	ENST00000299300	CCT2
0.000928684	0.338524	0.759	0.671	1	7	0	ENST00000300026	PPIB
0.00419623	0.484904	0.333	0.222	1	8	0	ENST00000300086	TERF2IP
0.000874485	0.726184	0.271	0.174	1	7	0	ENST00000300952	MIDN
0.00451115	1.07145	0.17	0.285	1	3	0	ENST00000301030	ANKRD11
0.00241827	0.296231	0.506	0.38	1	7	0	ENST00000301457	NDUFA7
0.00410228	0.537911	0.393	0.284	1	8	0	ENST00000301788	POLR2G
0.00765977	0.609566	0.416	0.284	1	11	0	ENST00000301788	POLR2G
0.000129687	-0.321802	0.333	0.373	1	1	0	ENST00000302217
0.00303281	0.391385	0.355	0.277	1	5	0	ENST00000302979	POLR1D
4.64339e-05	0.526738	0.219	0.402	1	3	0	ENST00000303221	EMB
0.00903975	0.394221	0.59	0.466	1	8	0	ENST00000303305	PA2G4
2.97528e-05	0.265509	0.264	0.207	1	2	0	ENST00000303575	TMED10
0.00296985	0.282185	0.517	0.447	1	5	0	ENST00000303731	TRAPPC1
0.000731322	-0.256916	0.308	0.348	1	0	0	ENST00000304385	TMEM154
0.00542433	0.670326	0.345	0.259	1	6	0	ENST00000304677	RNASE6
7.65966e-05	0.875763	0.427	0.26	1	11	0	ENST00000304677	RNASE6
0.000219543	0.47334	0.536	0.382	1	7	0	ENST00000305786	CYCS
0.000371247	0.375406	0.825	0.736	1	7	0	ENST00000306072	ISG20
0.000348796	0.268584	0.658	0.554	1	4	0	ENST00000308961	NDUFA11
0.00374028	0.284336	0.846	0.747	1	8	0	ENST00000309579	ATP5MK
0.000243955	0.338148	0.307	0.219	1	4	0	ENST00000310144	PSMC5
0.00031324	0.456407	0.259	0.132	1	9	0	ENST00000310396	CPED1
4.69333e-05	0.334271	0.805	0.652	1	6	0	ENST00000311507	PLAC8
0.00316025	0.384301	0.632	0.504	1	8	0	ENST00000311549	RPL21
0.00291385	0.2767	0.56	0.476	1	5	0	ENST00000311604	LSP1
0.000146074	0.271289	0.964	0.879	1	7	0	ENST00000311672	UQCRH
0.00372066	0.343858	0.639	0.48	1	9	0	ENST00000314583	HCLS1
0.000913443	0.341563	0.889	0.766	1	8	0	ENST00000314675	UBXN11
0.00428004	0.631521	0.269	0.164	1	9	0	ENST00000316963	LYPLA1
0.00998914	0.299809	0.684	0.604	1	8	0	ENST00000317881	SLC25A5
0.000927509	0.324606	0.528	0.447	1	4	0	ENST00000318066	UBE2N
0.00249704	-0.487264	0.379	0.454	1	5	0	ENST00000318066	UBE2N
0.00163591	0.397708	0.465	0.353	1	6	0	ENST00000318388	NDUFV2
0.000769407	0.517444	0.663	0.506	1	11	0	ENST00000318607	PABPC1
0.00453464	0.269107	0.584	0.501	1	5	0	ENST00000318950	SWAP70
0.00349435	0.41815	0.319	0.217	1	7	0	ENST00000319074	C14orf119
0.000164738	0.334595	0.759	0.587	1	7	0	ENST00000319248	PRDX1
0.00444396	0.319424	0.265	0.199	1	4	0	ENST00000319285	DCTPP1
0.00197328	0.713008	0.259	0.15	1	9	0	ENST00000321358	YBX1
0.00603017	0.271499	0.759	0.687	1	7	0	ENST00000322028	POLR2L
0.000169562	1.86941	0.29	0.264	1	3	0	ENST00000324198	GRK3
0.00456746	0.266702	0.336	0.262	1	5	0	ENST00000324198	GRK3
0.000638084	-0.268549	0.352	0.389	1	0	0	ENST00000325239	WDFY4
0.00486313	0.458574	0.313	0.226	1	7	0	ENST00000327492	TOB2
0.00290214	0.357987	0.535	0.477	1	5	0	ENST00000327839	CLECL1P
0.003861	0.297724	0.769	0.618	1	8	0	ENST00000329559	NDUFB1
0.00683284	0.416813	0.286	0.224	1	4	0	ENST00000329970	GTF3C6
0.000308452	0.428487	0.298	0.211	1	4	0	ENST00000330540	CD86
6.82345e-05	0.979524	0.374	0.213	1	10	0	ENST00000330540	CD86
0.000230619	0.292924	0.849	0.71	1	7	0	ENST00000330927	EVI2B
0.00145257	0.343761	0.283	0.208	1	4	0	ENST00000333130	MRPL40
0.00249978	0.451609	0.278	0.208	1	5	0	ENST00000333130	MRPL40
0.000785486	0.9488	0.326	0.182	1	11	0	ENST00000334270	TTF1
2.46257e-05	0.271062	0.378	0.342	1	0	0	ENST00000335514	ATP5IF1
0.00289829	0.416725	0.367	0.264	1	7	0	ENST00000336133	SARNP
0.000599781	0.385092	0.385	0.293	1	5	0	ENST00000336273	MTDH
0.000438416	0.269633	0.702	0.603	1	4	0	ENST00000337147	EZR
5.76344e-05	0.51062	0.729	0.605	1	7	0	ENST00000337147	EZR
0.0026792	0.583617	0.404	0.271	1	11	0	ENST00000337682	SINHCAF
0.00709917	0.369002	0.528	0.382	1	11	0	ENST00000338970	RPL14
0.00100851	0.41373	0.697	0.527	1	11	0	ENST00000339647	UBC
0.00889231	0.315876	0.352	0.285	1	5	0	ENST00000340385	PRDX6
0.00071123	0.276864	0.343	0.227	1	7	0	ENST00000340635	PDE4D
0.000274842	0.563158	0.37	0.277	1	5	0	ENST00000340855	IDS
0.00189815	0.277279	0.566	0.429	1	7	0	ENST00000341423	HMGB1
0.00108176	0.285416	0.578	0.483	1	4	0	ENST00000341942	LAMTOR4
0.0028242	0.33874	0.5	0.376	1	7	0	ENST00000343139	HLA-DQA1
0.000664061	0.282309	0.466	0.377	1	4	0	ENST00000344843	MRPL20
0.00324921	1.49824	0.366	0.413	1	3	0	ENST00000346872	IKZF3
0.00860505	0.276122	0.327	0.265	1	4	0	ENST00000347519	CHMP4A
0.00415826	0.36304	0.434	0.315	1	7	0	ENST00000353107	POLR2K
0.00101528	-0.517605	0.273	0.3	1	2	0	ENST00000354416	SEPTIN6
0.00017239	0.642702	0.319	0.198	1	7	0	ENST00000355327	THSD4
0.000230232	-0.256559	0.302	0.345	1	0	0	ENST00000355704	TBC1D22A
0.00811279	1.51372	0.315	0.332	1	3	0	ENST00000355704	TBC1D22A
0.00122777	0.390857	0.26	0.186	1	4	0	ENST00000355937	PRELID3B
0.00947289	0.379911	0.53	0.418	1	8	0	ENST00000355938	ATP5MC1
0.000671993	0.589221	0.259	0.158	1	7	0	ENST00000356126	PSMD12
0.00471939	0.525478	0.359	0.244	1	8	0	ENST00000356971	CILK1
0.00308882	0.277325	0.442	0.374	1	4	0	ENST00000356978	CALM1
0.000402172	-0.580659	0.254	0.35	1	5	0	ENST00000357066	MOB3A
1.97216e-05	0.626842	0.488	0.344	1	7	0	ENST00000357066	MOB3A
0.000570546	0.34836	0.633	0.556	1	5	0	ENST00000357156	DYNLRB1
8.62697e-05	1.86221	0.267	0.23	1	3	0	ENST00000357258	ZBTB20
0.00604085	0.807855	0.298	0.495	1	3	0	ENST00000357604	UPF2
0.000698179	0.514076	0.648	0.485	1	9	0	ENST00000357604	UPF2
0.00877136	0.357702	0.283	0.224	1	4	0	ENST00000358227	DMAC1
0.000233292	-0.44703	0.229	0.266	1	1	0	ENST00000359570	INPP5D
0.00564865	0.531432	0.361	0.245	1	9	0	ENST00000361189	PJA2
7.39202e-05	0.359	0.363	0.259	1	4	0	ENST00000361272	CNOT7
5.61007e-05	0.457445	0.548	0.372	1	7	0	ENST00000361365	EIF1AY
2.15873e-05	-0.386161	0.994	0.99	1	7	0	ENST00000361390	MT-ND1
7.1468e-05	-0.254234	0.997	0.999	1	5	0	ENST00000361739	MT-CO2
0.00039622	-0.271189	1	0.999	1	6	0	ENST00000361739	MT-CO2
0.000107872	-0.251484	0.997	0.999	1	5	0	ENST00000361789	MT-CYB
0.00620608	-0.26143	1	0.999	1	6	0	ENST00000361789	MT-CYB
5.44416e-05	0.535501	0.38	0.238	1	7	0	ENST00000361842	XAF1
0.000823003	0.771192	0.382	0.239	1	11	0	ENST00000361842	XAF1
0.00190614	-0.274916	1	0.999	1	5	0	ENST00000361899	MT-ATP6
8.35628e-05	0.271912	0.85	0.762	1	4	0	ENST00000366815	H3-3A
0.00010545	0.734168	0.295	0.178	1	7	0	ENST00000366928	LYPLAL1
0.000350859	1.78293	0.264	0.232	1	3	0	ENST00000366997	LPGAT1
0.00295902	0.368546	0.371	0.232	1	11	0	ENST00000366997	LPGAT1
0.00500955	0.32367	0.596	0.486	1	7	0	ENST00000367075	EZR
0.00856687	-0.474722	0.535	0.626	1	10	0	ENST00000367091	FCMR
0.000164338	0.442455	0.307	0.217	1	4	0	ENST00000367156	KLHDC8A
0.00843159	0.396519	0.307	0.219	1	7	0	ENST00000367156	KLHDC8A
0.00015702	-0.271257	0.356	0.397	1	0	0	ENST00000367941	STX7
2.64647e-05	0.344698	0.743	0.646	1	5	0	ENST00000368097	TAGLN2
0.00655967	0.332032	0.723	0.648	1	7	0	ENST00000368097	TAGLN2
0.000433588	0.747139	0.25	0.131	1	9	0	ENST00000368141	MNDA
3.3951e-05	1.07948	0.281	0.131	1	11	0	ENST00000368141	MNDA
0.000531867	0.785452	0.278	0.152	1	9	0	ENST00000368170	CD1C
0.000173959	1.13015	0.292	0.152	1	11	0	ENST00000368170	CD1C
0.00718029	0.373514	0.708	0.586	1	11	0	ENST00000368176	FCRL1
0.00243414	0.264991	0.431	0.356	1	4	0	ENST00000368305	LAMTOR2
0.000199255	0.601514	0.5	0.356	1	7	0	ENST00000368305	LAMTOR2
0.000395214	0.550904	0.521	0.356	1	8	0	ENST00000368305	LAMTOR2
3.41566e-05	0.59662	0.134	0.265	1	3	0	ENST00000368655	GATAD2B
4.57811e-05	0.458987	0.889	0.743	1	10	0	ENST00000368716	S100A4
0.00596608	0.276289	0.899	0.743	1	11	0	ENST00000368716	S100A4
0.00653476	0.343304	0.685	0.544	1	9	0	ENST00000368719	S100A6
0.00891532	0.265202	0.257	0.234	1	1	0	ENST00000368884	PSMD4
0.00282557	0.273501	0.667	0.483	1	9	0	ENST00000368985	CTSS
0.00182335	0.831647	0.343	0.211	1	10	0	ENST00000369314	POLR3GL
0.000290943	-0.293828	0.304	0.34	1	1	0	ENST00000369577	ZNF292
0.00274401	0.275288	0.322	0.245	1	4	0	ENST00000369709	RAP1A
0.00648905	0.352068	0.343	0.246	1	7	0	ENST00000369709	RAP1A
0.00686228	0.263995	0.265	0.205	1	4	0	ENST00000370008	STXBP3
0.00124892	0.337484	0.333	0.247	1	4	0	ENST00000371419	PFDN4
0.00245279	0.457332	0.292	0.22	1	4	0	ENST00000371442	RNF113A
0.0061247	-0.317895	0.242	0.269	1	1	0	ENST00000371621	PTPN1
0.00493232	0.299718	0.639	0.503	1	7	0	ENST00000371646	HSP90AB1
2.36402e-05	-0.338517	0.26	0.303	1	1	0	ENST00000371727	EPS15
0.00473853	0.482945	0.326	0.202	1	11	0	ENST00000371998	NCOA3
0.00101369	0.362992	0.349	0.233	1	7	0	ENST00000372734	ADK
0.000442807	0.256848	0.295	0.203	1	4	0	ENST00000372858	PABPC4
0.00723267	0.336251	0.651	0.577	1	5	0	ENST00000373212	SH3BGRL
0.00505906	0.478428	0.271	0.188	1	7	0	ENST00000373337	TMEM35B
0.000736864	0.625428	0.305	0.208	1	6	0	ENST00000373358	PBDC1
0.0083831	-0.300419	0.249	0.272	1	1	0	ENST00000373408	CCDC167
0.000296875	0.665218	0.461	0.307	1	11	0	ENST00000373586	EIF3I
0.00294819	0.30709	0.44	0.366	1	4	0	ENST00000373715	SRSF3
0.00792021	0.304488	0.465	0.367	1	6	0	ENST00000373715	SRSF3
0.00118131	1.92261	0.278	0.266	1	3	0	ENST00000373719	OGT
0.000450189	0.388602	0.494	0.343	1	7	0	ENST00000374077	ROMO1
0.000381352	0.298903	0.389	0.291	1	4	0	ENST00000374358	TMEM50A
0.000374311	0.63349	0.687	0.504	1	10	0	ENST00000374517	TXN
0.00336684	0.575142	0.479	0.362	1	8	0	ENST00000375706
0.00187358	0.529592	0.303	0.171	1	11	0	ENST00000375746	SYK
0.000166885	0.625736	0.287	0.2	1	5	0	ENST00000375751	SYK
7.00452e-05	0.603181	0.315	0.201	1	6	0	ENST00000375751	SYK
0.000790998	0.953404	0.337	0.202	1	11	0	ENST00000375751	SYK
0.00443798	0.305538	0.269	0.158	1	9	0	ENST00000376236	APBB1IP
0.00107741	0.315225	0.711	0.586	1	7	0	ENST00000376327	PLP2
0.000666217	0.488442	0.761	0.586	1	8	0	ENST00000376327	PLP2
0.000136325	0.270463	0.789	0.671	1	5	0	ENST00000376414	GPR183
0.004338	0.819733	0.333	0.222	1	8	0	ENST00000377384	ZNG1E
0.000129326	0.333125	0.867	0.718	1	7	0	ENST00000378024	AHNAK
0.00643501	-0.627105	0.212	0.348	1	10	0	ENST00000378060	VPS36
0.000313756	0.322519	0.349	0.255	1	5	0	ENST00000379096	TPD52
5.31406e-05	-0.343454	0.285	0.331	1	0	0	ENST00000379516	SNX2
0.000162822	1.70984	0.324	0.316	1	3	0	ENST00000379516	SNX2
0.00731791	0.441537	0.426	0.315	1	9	0	ENST00000379516	SNX2
0.00672096	0.287334	0.566	0.451	1	7	0	ENST00000379638	REEP5
0.000198693	0.450451	0.381	0.281	1	4	0	ENST00000379847	NDUFB6
0.000318574	0.376117	0.324	0.233	1	5	0	ENST00000380629	BNIP3L
0.00859599	0.442775	0.354	0.236	1	10	0	ENST00000380629	BNIP3L
0.000145272	0.608532	0.361	0.203	1	9	0	ENST00000380636	TMSB4X
0.00391641	0.297783	0.275	0.191	1	6	0	ENST00000380916	ZDHHC21
0.000654341	0.577746	0.301	0.195	1	7	0	ENST00000381323	CYRIA
0.000478442	0.803719	0.263	0.135	1	10	0	ENST00000382374	MICU2
2.39671e-05	-0.403384	0.216	0.259	1	1	0	ENST00000389793	LYST
0.000219863	0.973281	0.404	0.244	1	10	0	ENST00000389793	LYST
0.00028541	-1.64174	0.333	0.481	1	10	0	ENST00000390239	IGKJ4
0.000416351	1.13874	0.256	0.144	1	8	0	ENST00000390241	IGKJ2
0.00662987	-2.46494	0.197	0.284	1	8	0	ENST00000390247	IGKV3-7
0.00913895	-0.855135	0.172	0.284	1	10	0	ENST00000390247	IGKV3-7
0.0015211	0.389051	0.28	0.205	1	4	0	ENST00000391970	PTPRC
0.00032953	1.28735	0.429	0.484	1	3	0	ENST00000392045	SP140
0.000347146	1.18787	0.449	0.515	1	3	0	ENST00000392048	SP110
0.00115899	0.41388	0.63	0.511	1	9	0	ENST00000392048	SP110
0.000579521	0.313558	0.463	0.361	1	4	0	ENST00000392246	SUMO1
0.00669264	0.288436	0.381	0.307	1	4	0	ENST00000392508	DYNLL1
0.00910445	0.422189	0.417	0.309	1	9	0	ENST00000392508	DYNLL1
3.18137e-05	0.281516	0.817	0.71	1	5	0	ENST00000392795	CD79B
0.0082625	0.291863	0.855	0.712	1	8	0	ENST00000392795	CD79B
0.00918303	0.434357	0.417	0.295	1	9	0	ENST00000393599	CDKN2D
0.00336736	0.288845	0.327	0.254	1	4	0	ENST00000394071	MIDEAS
0.00731592	0.298731	0.355	0.255	1	7	0	ENST00000394071	MIDEAS
0.00471247	0.271939	0.263	0.193	1	4	0	ENST00000394295	ANXA4
0.00880394	0.378739	0.277	0.194	1	7	0	ENST00000394295	ANXA4
0.00691457	0.251542	0.301	0.234	1	4	0	ENST00000395323	LBH
0.00121169	0.503072	0.426	0.288	1	9	0	ENST00000395422	CHCHD2
0.00293112	0.594191	0.494	0.364	1	11	0	ENST00000395535	SEC61G
0.00671037	0.679286	0.364	0.632	1	3	0	ENST00000395957	YWHAZ
0.00089387	0.344963	0.538	0.442	1	5	0	ENST00000396776	GAPT
0.0077053	0.35681	0.394	0.321	1	5	0	ENST00000397149	SMU1
0.0056495	0.334759	0.316	0.248	1	4	0	ENST00000397261	ARPC4
0.00647929	0.453922	0.26	0.182	1	6	0	ENST00000398576	LCP1
0.0015704	0.884536	0.315	0.185	1	11	0	ENST00000398606	GSTP1
0.00666816	0.608656	0.449	0.317	1	11	0	ENST00000398884	TOMM6
0.000810585	-0.3179	0.295	0.328	1	1	0	ENST00000399503	MAP3K1
3.9753e-05	-0.289302	0.311	0.36	1	0	0	ENST00000399788	KDM5A
0.00241746	0.464821	0.287	0.171	1	9	0	ENST00000399799	ROCK1
0.000258731	1.23066	0.283	0.155	1	10	0	ENST00000399916	RUNX3
0.00272822	0.938737	0.27	0.156	1	11	0	ENST00000400087	ATP5PF
0.00148827	0.452763	0.305	0.206	1	6	0	ENST00000400485	MORC3
0.000110145	0.655759	0.419	0.252	1	8	0	ENST00000404735	RPS27A
0.00405533	0.682899	0.253	0.413	1	3	0	ENST00000406337	KAT6A
3.36319e-05	-0.617454	0.286	0.383	1	4	0	ENST00000408968	IFITM1
0.000732187	0.525886	0.5	0.376	1	7	0	ENST00000408968	IFITM1
0.00821766	0.251597	0.504	0.377	1	8	0	ENST00000408968	IFITM1
0.00143671	0.351084	0.33	0.251	1	4	0	ENST00000409393	CRIP1
0.000174584	0.465255	0.343	0.25	1	5	0	ENST00000409393	CRIP1
0.00552403	0.332105	0.355	0.252	1	7	0	ENST00000409393	CRIP1
6.7266e-05	1.98001	0.25	0.207	1	3	0	ENST00000409592	DOCK10
0.00219403	0.516026	0.535	0.376	1	10	0	ENST00000409921	CAPG
0.0064005	-0.253295	0.224	0.253	1	1	0	ENST00000411529	HNRNPA3
0.00697463	0.379047	0.301	0.208	1	7	0	ENST00000411646	SMIM26
0.00087882	1.02846	0.273	0.155	1	10	0	ENST00000411993	HDAC9
0.00279869	0.284004	0.29	0.261	1	1	0	ENST00000414075	GAS5
0.00693183	-0.618441	0.175	0.272	1	7	0	ENST00000414075	GAS5
0.000375926	0.456369	0.268	0.192	1	4	0	ENST00000415136	DDOST
0.000113386	-0.696648	0.602	0.672	1	7	0	ENST00000415888	RALGPS2
3.30212e-05	0.49247	0.705	0.539	1	7	0	ENST00000418115	RHOA
0.00372262	0.353968	0.701	0.54	1	8	0	ENST00000418115	RHOA
0.00507436	0.420837	0.687	0.541	1	10	0	ENST00000418115	RHOA
0.00520397	0.470416	0.265	0.182	1	7	0	ENST00000418931	HLA-DPB1
0.00939425	0.371554	0.786	0.705	1	8	0	ENST00000419277	HLA-DPA1
0.000607471	0.256317	0.445	0.345	1	4	0	ENST00000422622	SSPN
0.000140694	0.715831	0.525	0.347	1	10	0	ENST00000422622	SSPN
0.000144272	0.253845	0.439	0.412	1	0	0	ENST00000423313	KIAA0040
8.14452e-05	0.525955	0.535	0.418	1	6	0	ENST00000423313	KIAA0040
3.47304e-05	-0.332358	0.343	0.387	1	1	0	ENST00000428648	VOPP1
0.000155709	0.298244	0.462	0.37	1	5	0	ENST00000428648	VOPP1
0.000630442	0.312589	0.648	0.532	1	5	0	ENST00000428908	BANK1
0.00286624	0.320431	0.685	0.535	1	11	0	ENST00000428908	BANK1
0.00519347	0.333329	0.596	0.503	1	7	0	ENST00000429133	XRCC5
0.0008402	0.390088	0.416	0.281	1	7	0	ENST00000429243	PRR13
0.000100157	0.630792	0.29	0.181	1	6	0	ENST00000429730	LINC01857
0.00152109	-0.334015	0.281	0.31	1	1	0	ENST00000432306	VTI1A
0.00838826	1.54736	0.318	0.338	1	3	0	ENST00000436598	OSBPL10-AS1
0.00585442	-0.325703	0.272	0.3	1	0	0	ENST00000442267	TBC1D9
0.00056186	0.79392	0.253	0.132	1	10	0	ENST00000442697	DNAJB14
3.07572e-05	-0.294227	0.622	0.651	1	1	0	ENST00000443035	DENND4A
0.00307905	0.701142	0.273	0.163	1	10	0	ENST00000443387	ZNF146
0.000624514	-0.922981	0.313	0.467	1	10	0	ENST00000443565	LINC01781
0.00299832	0.736875	0.337	0.217	1	11	0	ENST00000444739	CASP4
0.000320672	0.291633	0.56	0.463	1	4	0	ENST00000447686	LIX1L-AS1
0.00435026	0.329282	0.759	0.64	1	9	0	ENST00000449573
0.00540423	0.344363	0.392	0.277	1	7	0	ENST00000450169	LSM5
0.00203918	0.251419	0.29	0.194	1	6	0	ENST00000451407	INPP5D
0.0077709	0.544648	0.278	0.179	1	9	0	ENST00000451826	LINC00571
8.05593e-05	1.4425	0.389	0.403	1	3	0	ENST00000452345	SP100
0.000213687	1.42614	0.426	0.488	1	3	0	ENST00000453677	KMT2E-AS1
0.000753513	0.341909	0.376	0.29	1	5	0	ENST00000454498	CSGALNACT1
0.00481341	-0.840964	0.199	0.295	1	7	0	ENST00000454498	CSGALNACT1
0.00489893	0.535697	0.427	0.292	1	11	0	ENST00000454498	CSGALNACT1
0.00108342	0.987799	0.263	0.15	1	10	0	ENST00000455357
0.000195565	0.355773	0.258	0.227	1	0	0	ENST00000455836	ERP29
3.05356e-05	0.260045	0.266	0.225	1	1	0	ENST00000455836	ERP29
0.00450008	-0.272736	0.236	0.264	1	1	0	ENST00000461436	MBNL1
0.00363531	0.587293	0.263	0.15	1	10	0	ENST00000462000	OLA1
2.07624e-05	-0.318756	0.42	0.461	1	1	0	ENST00000464827	ST6GAL1
0.000785173	0.776057	0.417	0.29	1	9	0	ENST00000465139	ANP32A
0.000141484	2.07717	0.256	0.216	1	3	0	ENST00000467716	C1GALT1
0.00301764	0.317012	0.3	0.216	1	6	0	ENST00000467716	C1GALT1
0.000212351	0.613866	0.331	0.213	1	7	0	ENST00000468626	LYST
0.000107184	0.590741	0.337	0.216	1	7	0	ENST00000472022	KLF12
0.00183528	-0.608259	0.226	0.305	1	5	0	ENST00000472053
0.000286064	-1.0036	0.19	0.304	1	6	0	ENST00000472053
0.000249325	0.805927	0.465	0.3	1	10	0	ENST00000472053
0.00230468	1.7959	0.304	0.302	1	3	0	ENST00000472310	MCUB
0.00704646	-0.616002	0.384	0.504	1	10	0	ENST00000474582	RPS8
0.000151236	-1.64492	0.146	0.334	1	11	0	ENST00000475724	LYPLAL1
0.000262338	0.310011	0.765	0.65	1	6	0	ENST00000475947	SNHG29
4.58893e-05	-0.853507	0.41	0.53	1	7	0	ENST00000477383
0.00170788	0.343172	0.287	0.163	1	9	0	ENST00000477925	SRPK2
0.00718863	0.821973	0.273	0.163	1	10	0	ENST00000477925	SRPK2
0.00787763	0.645311	0.343	0.225	1	10	0	ENST00000478547	EIF3D
0.000124236	-0.348877	0.248	0.29	1	0	0	ENST00000481915	DYNC1LI1
0.00255775	0.335363	0.271	0.199	1	4	0	ENST00000482684	CUTA
0.00408136	0.343742	0.285	0.2	1	6	0	ENST00000482684	CUTA
6.40142e-05	0.893893	0.296	0.157	1	9	0	ENST00000484212	TFEC
0.000512097	0.504117	0.463	0.315	1	9	0	ENST00000485326	FOXP1
0.00681131	-0.299753	0.291	0.318	1	0	0	ENST00000486152	ZBTB20
0.00224398	-0.37349	0.287	0.319	1	1	0	ENST00000486152	ZBTB20
0.000265618	1.8516	0.321	0.309	1	3	0	ENST00000486152	ZBTB20
0.000767734	-0.895381	0.245	0.312	1	4	0	ENST00000486152	ZBTB20
3.03766e-05	1.5661	0.378	0.373	1	3	0	ENST00000487145	CDK14
0.00180081	0.520057	0.519	0.371	1	9	0	ENST00000487145	CDK14
0.00584609	0.312698	0.295	0.229	1	4	0	ENST00000488034	CUTA
0.00438252	0.522032	0.333	0.23	1	8	0	ENST00000488034	CUTA
0.00596896	-0.256404	0.291	0.32	1	0	0	ENST00000489372	JMJD1C
1.97519e-05	1.78457	0.33	0.31	1	3	0	ENST00000489372	JMJD1C
0.00483762	0.317934	0.271	0.203	1	4	0	ENST00000490191	RPS18
0.00106324	0.306383	0.821	0.698	1	8	0	ENST00000491560	ATP5MF
0.00386912	0.467218	0.382	0.243	1	11	0	ENST00000492274	ST7L
4.45257e-05	-0.382886	0.289	0.328	1	1	0	ENST00000493459	MBNL1
0.0036214	-2.64636	0.239	0.285	1	4	0	ENST00000496168	IGKV1-5
0.000172355	0.569481	0.788	0.684	1	10	0	ENST00000496817	S100A6
0.00828341	0.259916	0.809	0.684	1	11	0	ENST00000496817	S100A6
0.00129568	-0.468583	0.375	0.478	1	6	0	ENST00000498020	HLA-DMB
0.00664276	0.497279	0.343	0.22	1	9	0	ENST00000498565	C14orf39
9.56148e-05	0.458069	0.274	0.185	1	4	0	ENST00000502346	TMEM167A
9.54247e-05	0.322547	0.389	0.285	1	4	0	ENST00000503258	PDE4D
0.00774676	0.404945	0.352	0.239	1	9	0	ENST00000503995	ARHGAP24
4.59974e-05	0.75393	0.333	0.181	1	9	0	ENST00000504123	CNOT6L
2.54221e-05	-0.609705	0.627	0.705	1	7	0	ENST00000504409	LINC02397
0.00480358	0.441938	0.307	0.217	1	7	0	ENST00000504921	MEF2C
0.00107196	0.360198	0.257	0.181	1	5	0	ENST00000506510	PDE4D
0.000436182	0.669547	0.289	0.181	1	7	0	ENST00000506510	PDE4D
0.00283918	0.630297	0.303	0.182	1	10	0	ENST00000506510	PDE4D
2.25449e-05	1.88572	0.395	0.393	1	3	0	ENST00000507116	PDE4D
6.62846e-05	0.522509	0.606	0.39	1	10	0	ENST00000507116	PDE4D
0.00173995	-1.27907	0.247	0.395	1	11	0	ENST00000507116	PDE4D
0.00837264	0.33459	0.265	0.203	1	4	0	ENST00000507261	RACK1
0.00644084	-0.436011	0.819	0.826	1	7	0	ENST00000508653	BANK1
0.00370128	0.661594	0.269	0.166	1	9	0	ENST00000510824	OCIAD1
0.000476885	-0.384621	0.424	0.454	1	1	0	ENST00000511245	MARCHF1
0.00148399	0.657274	0.495	0.344	1	10	0	ENST00000511382	PDE4D
0.00604971	0.26821	0.699	0.561	1	7	0	ENST00000511472	COX7C
0.00467069	0.358079	0.854	0.727	1	11	0	ENST00000511653	COPS4
0.00553678	0.396873	0.277	0.187	1	7	0	ENST00000512690	RPS3A
0.00697851	0.355475	0.298	0.233	1	4	0	ENST00000513458	SREK1IP1
0.00858314	0.543342	0.371	0.255	1	11	0	ENST00000518437	THUMPD3-AS1
7.12242e-05	1.95063	0.295	0.264	1	3	0	ENST00000518486	FBXL17
7.43683e-05	-0.277183	0.371	0.423	1	0	0	ENST00000518552
0.000334918	0.754888	0.605	0.81	1	3	0	ENST00000518797	CD74
0.00536182	-0.388469	0.235	0.261	1	1	0	ENST00000519752	ADAM19
6.00118e-05	1.90019	0.287	0.252	1	3	0	ENST00000519752	ADAM19
0.000153336	0.28133	0.28	0.244	1	1	0	ENST00000520348	SNHG6
0.00013314	0.355863	0.345	0.247	1	4	0	ENST00000520517	COX6C
4.56018e-05	2.05559	0.25	0.204	1	3	0	ENST00000522220	PDE7A
0.00159524	0.462178	0.607	0.476	1	8	0	ENST00000524270	SPSB2
0.00552935	0.693788	0.299	0.199	1	8	0	ENST00000525566	TXNRD1
0.0072521	0.68599	0.296	0.199	1	9	0	ENST00000525566	TXNRD1
0.000925804	0.67755	0.436	0.305	1	8	0	ENST00000525675	C11orf98
0.00511381	0.577442	0.287	0.182	1	9	0	ENST00000526639	SNRNP35
0.00818893	0.269532	0.254	0.189	1	5	0	ENST00000529163	RPL8
0.000101863	0.753285	0.333	0.182	1	9	0	ENST00000531523	SNHG9
0.00225361	-0.258086	0.242	0.273	1	1	0	ENST00000533454	UVRAG
7.16975e-05	0.421012	0.471	0.376	1	5	0	ENST00000534668	MS4A1
0.0017285	0.628987	0.475	0.336	1	10	0	ENST00000536562	DENND5B
0.00182379	-0.313482	0.386	0.416	1	1	0	ENST00000538035	RIPOR2
0.00268878	0.655428	0.455	0.302	1	10	0	ENST00000538142	SSPN
5.84338e-05	0.466507	0.325	0.195	1	7	0	ENST00000539019	SSPN
0.000225193	-0.389146	0.338	0.371	1	1	0	ENST00000540479	CALML4
5.14599e-05	-0.326586	0.479	0.51	1	2	0	ENST00000540870	SP110
9.05013e-05	0.301987	0.612	0.501	1	5	0	ENST00000540870	SP110
0.00388531	0.34181	0.652	0.503	1	11	0	ENST00000540870	SP110
3.29497e-05	1.0652	0.281	0.13	1	11	0	ENST00000541196	HCP5
0.00233754	0.368399	0.268	0.199	1	4	0	ENST00000541231	TIMM8B
0.00128307	-0.29836	0.264	0.304	1	2	0	ENST00000543780
0.00693588	0.499929	0.407	0.296	1	9	0	ENST00000543780
0.00205779	-0.635928	0.152	0.3	1	10	0	ENST00000543780
0.00738413	0.34181	0.616	0.472	1	10	0	ENST00000544440	MYCBP2
0.00664194	0.780108	0.17	0.277	1	3	0	ENST00000546455	PCED1B
0.00867072	0.324481	0.327	0.27	1	5	0	ENST00000546455	PCED1B
3.65633e-05	0.268511	0.994	0.903	1	7	0	ENST00000547649	MYL6
0.00600953	0.410862	0.337	0.235	1	7	0	ENST00000547704	NAP1L1
0.00640607	0.251957	0.549	0.478	1	4	0	ENST00000549115	CHURC1
0.000224128	-0.307348	0.213	0.253	1	0	0	ENST00000549235	FUT8
0.000107924	1.98566	0.273	0.239	1	3	0	ENST00000549235	FUT8
0.00672262	0.268187	0.54	0.457	1	4	0	ENST00000550487	COX14
0.00869505	0.342168	0.352	0.285	1	5	0	ENST00000553300	HNRNPC
0.00852786	-0.288239	0.233	0.256	1	1	0	ENST00000553754
0.000250913	0.346463	0.336	0.245	1	4	0	ENST00000553754
0.000882329	0.296561	0.446	0.357	1	5	0	ENST00000555558	IFI27L2
0.00387652	0.282063	0.289	0.218	1	4	0	ENST00000555736
0.0048247	0.254046	0.678	0.596	1	4	0	ENST00000557016	ERH
0.00912168	-0.257669	0.237	0.264	1	0	0	ENST00000559276	USP3
0.000597276	0.575253	0.283	0.18	1	7	0	ENST00000560997	SNX22
0.00219667	-0.292366	0.224	0.256	1	0	0	ENST00000561381	USP3
0.000599043	-0.328345	0.222	0.256	1	1	0	ENST00000561381	USP3
7.11777e-05	0.341935	0.898	0.776	1	9	0	ENST00000561775	RPL4
0.00244051	0.289886	0.295	0.195	1	7	0	ENST00000565617	ZNNT1
0.00528374	0.257018	0.496	0.408	1	4	0	ENST00000567229	RPL4
0.00619551	0.257654	0.254	0.188	1	4	0	ENST00000571133	RSL1D1
0.00532271	0.259166	0.808	0.733	1	10	0	ENST00000573283	ACTG1
0.000619593	0.371502	0.753	0.628	1	7	0	ENST00000574081	SCIMP
2.06885e-05	0.815621	0.173	0.337	1	3	0	ENST00000576628	ACAP1
0.000384884	0.456119	0.452	0.328	1	7	0	ENST00000576628	ACAP1
0.000669232	-0.527573	0.394	0.473	1	5	0	ENST00000579003	MIR142HG
0.00809559	0.253077	0.572	0.468	1	7	0	ENST00000579003	MIR142HG
0.00457513	-0.5264	0.41	0.483	1	6	0	ENST00000582401	TXNIP
0.00563511	0.776382	0.296	0.198	1	9	0	ENST00000583931	ANP32E
0.000270623	0.483495	0.289	0.171	1	7	0	ENST00000584717	CCDC57
0.00389246	0.529004	0.25	0.146	1	9	0	ENST00000586518	H3-3B
0.00172544	0.261996	0.819	0.669	1	7	0	ENST00000588234	C19orf53
0.00523369	0.366711	0.778	0.671	1	8	0	ENST00000588234	C19orf53
0.000200307	0.279464	0.934	0.822	1	7	0	ENST00000589417	H3-3B
0.00667584	-0.412703	0.267	0.292	1	1	0	ENST00000589955	BCL2
0.00504925	0.377251	0.538	0.393	1	8	0	ENST00000591899	UQCR11
0.00468599	0.369335	0.349	0.243	1	7	0	ENST00000595545	FBL
0.0055339	0.390092	0.295	0.21	1	6	0	ENST00000596315	EMP3
0.00840359	0.446277	0.422	0.323	1	7	0	ENST00000601116
0.000516056	-0.890784	0.152	0.327	1	10	0	ENST00000601116
0.000473441	0.456346	0.355	0.23	1	7	0	ENST00000602172	CARD8-AS1
0.00100856	0.590317	0.37	0.231	1	9	0	ENST00000602172	CARD8-AS1
0.00160175	0.317699	0.304	0.22	1	4	0	ENST00000602252	RPS11
0.00191861	0.573512	0.325	0.222	1	7	0	ENST00000602252	RPS11
0.000388244	0.960208	0.354	0.222	1	10	0	ENST00000602252	RPS11
0.00814514	0.271356	0.392	0.295	1	7	0	ENST00000602520	SNHG8
0.00465982	-0.306092	0.281	0.31	1	1	0	ENST00000603037	FTX
0.000542018	-0.466014	0.318	0.353	1	2	0	ENST00000608190
3.86934e-05	0.703289	0.361	0.199	1	9	0	ENST00000608684
0.000547772	0.729762	0.193	0.338	1	3	0	ENST00000608933	PPM1K
6.06189e-05	0.443243	0.274	0.186	1	4	0	ENST00000611116	TRAC
4.45596e-05	0.643606	0.319	0.187	1	7	0	ENST00000611116	TRAC
3.58906e-05	-0.978655	0.168	0.263	1	4	0	ENST00000612282
0.00201773	-0.902144	0.196	0.262	1	5	0	ENST00000612282
0.00944275	-0.946004	0.148	0.261	1	9	0	ENST00000612282
0.000617707	-2.11006	0.112	0.261	1	11	0	ENST00000612282
0.000851959	0.672429	0.296	0.17	1	9	0	ENST00000613047	DIPK1A
0.00283706	-0.36019	0.735	0.768	1	7	0	ENST00000613788	CD48
0.000241621	0.383132	0.53	0.377	1	7	0	ENST00000614145	MRPS21
0.000122103	0.289311	0.685	0.568	1	5	0	ENST00000616316	IFITM2
0.000137483	0.298067	0.952	0.857	1	7	0	ENST00000616760	CLIC1
0.00666739	0.389542	0.404	0.305	1	7	0	ENST00000616787
0.000516627	0.287765	0.488	0.34	1	7	0	ENST00000617763	NDUFA6
0.000122544	0.364058	0.339	0.243	1	4	0	ENST00000620514	HMGN3
3.25178e-05	0.583124	0.398	0.244	1	7	0	ENST00000620514	HMGN3
0.00667507	0.311396	0.735	0.625	1	8	0	ENST00000621421	SAP18
0.000701291	0.422189	0.301	0.19	1	7	0	ENST00000627864	MECP2
7.32627e-05	1.73345	0.341	0.33	1	3	0	ENST00000629847	MEF2C
0.00891462	1.58798	0.267	0.264	1	3	0	ENST00000632133
0.00346112	0.357424	0.343	0.239	1	7	0	ENST00000634222	CPNE5
3.7765e-05	0.940997	0.306	0.161	1	9	0	ENST00000637169	TCF4
0.00378133	0.710915	0.281	0.161	1	11	0	ENST00000637169	TCF4
0.00102853	-0.358626	0.333	0.365	1	1	0	ENST00000637532	ARID1B
0.00063609	0.310716	0.295	0.209	1	4	0	ENST00000642050	PPT1
0.000213616	-0.313438	0.227	0.266	1	0	0	ENST00000642462	ATP8B1
0.000104015	1.95614	0.281	0.252	1	3	0	ENST00000642462	ATP8B1
0.000115469	1.8045	0.264	0.221	1	3	0	ENST00000644715	MTAP
0.00766366	0.597623	0.324	0.222	1	9	0	ENST00000644715	MTAP
0.000779966	0.44102	0.422	0.29	1	7	0	ENST00000645147	GPR174
4.40762e-05	-0.272128	0.635	0.665	1	1	0	ENST00000645517	PRKCB
3.368e-05	0.605529	0.607	0.384	1	11	0	ENST00000648513
0.00767777	0.322484	0.33	0.261	1	5	0	ENST00000648748	FOXP1
0.00468983	0.75262	0.382	0.263	1	11	0	ENST00000648748	FOXP1
0.000656209	-1.05085	0.222	0.364	1	8	0	ENST00000649279	SETBP1
0.000479589	0.292485	0.843	0.705	1	9	0	ENST00000652167	FAM153CP
9.98122e-05	0.275943	0.746	0.643	1	4	0	ENST00000652974	CALM2
0.000380432	0.313768	0.713	0.645	1	5	0	ENST00000652974	CALM2
0.000140914	0.314619	0.849	0.709	1	7	0	ENST00000654795	SNHG5
0.000603719	0.505142	0.331	0.214	1	7	0	ENST00000660416	LINC00342
0.00139025	0.583684	0.265	0.172	1	7	0	ENST00000661844	PART1
0.00358029	0.394908	0.343	0.244	1	7	0	ENST00000666034
0.00346797	0.331777	0.283	0.187	1	7	0	ENST00000666473
0.00147236	-0.9778	0.247	0.353	1	7	0	ENST00000672204	AFF3
0.00134389	0.464775	0.281	0.205	1	5	0	ENST00000672822	AFF3
0.000627448	0.718955	0.3	0.205	1	6	0	ENST00000672822	AFF3
